# Supplementary material
Source: Research Square preprint supplement (doi:10.21203/rs.3.rs-9256156/v1)
Supplement: Supplementary file 1 [file bcd86bf8dc6a2fb1f06c2105.xlsx]

## Sheet: S1
Supplementary Data S1. Protein identification results of P-cadherin and E-cadherin proximal proteins from A431D (E-cadherin/P-cadherin-null) cells expressing P-cad-TurboID or E-cad-TurboID.
Protein IDs	Protein names	Gene names	Term ID (Top10 strength)	Term description (subcellular localization enrichment)	Number of proteins	Razor + unique peptides	Razor + unique peptides E1	Razor + unique peptides E2	Razor + unique peptides E3	Razor + unique peptides P1	Razor + unique peptides P2	Razor + unique peptides P3	Razor + unique peptides T1	Razor + unique peptides T2	Razor + unique peptides T3	Unique peptides E1	Unique peptides E2	Unique peptides E3	Unique peptides P1	Unique peptides P2	Unique peptides P3	Unique peptides T1	Unique peptides T2	Unique peptides T3	Mol. weight [kDa]	Q-value	Score	Sequence coverage E1 [%]	Sequence coverage E2 [%]	Sequence coverage E3 [%]	Sequence coverage P1 [%]	Sequence coverage P2 [%]	Sequence coverage P3 [%]	Sequence coverage T1 [%]	Sequence coverage T2 [%]	Sequence coverage T3 [%]	Intensity E1	Intensity E2	Intensity E3	Average intensity E	Intensity P1	Intensity P2	Intensity P3	Average intensity P	Intensity T1	Intensity T2	Intensity T3	Average intensity T	Fold change P/T
P-cadherin-TurboID unique proteins
Q9NRG9;F8VZ44;H3BU82;F8VUB6	Aladin	AAAS	GOCC:0072686	Mitotic spindle	4	11	6	1	4	5	3	5	2	4	5	6	1	4	5	3	5	2	4	5	59.573	0	38.017	13.7	2.7	9.5	11.4	7.1	11.2	4.8	9.3	11	2150600000	94578000	1215900000	1.15369e+09	2064600000	332560000	1425900000	1.27435e+09	318440000	358070000	1147000000	6.07837e+08	2.09654
A0A0G2JJD3;O95870;A0A0G2JI89;F2Z3G6;F2Z3H2	Alpha/beta hydrolase domain-containing protein 16A	ABHD16A			5	6	4	0	0	5	0	1	2	0	2	4	0	0	5	0	1	2	0	2	67.518	0	16.611	7	0	0	10.1	0	1.5	4.2	0	3.5	357110000	0	0	1.19037e+08	561600000	0	54926000	2.05509e+08	126370000	0	156150000	9.41733e+07	2.18224
P45954	Short/branched chain specific acyl-CoA dehydrogenase, mitochondrial	ACADSB	GOCC:0070013,GOCC:0005739,GOCC:0005759	Intracellular organelle lumen,Mitochondrion,Mitochondrial matrix	1	10	3	4	1	2	7	4	3	3	2	3	4	1	2	7	4	3	3	2	47.485	0	77.204	7.6	21.5	2.3	4.6	29.4	12.7	13	13.9	6.7	227550000	1055700000	99156000	460802000	184210000	2368400000	636170000	1.06293e+09	289740000	752640000	258010000	4.33463e+08	2.45217
A0A1B0GTG3;F8WC59;C9JYZ0;A0A1B0GV31;A0A1B0GU86;Q03154;A0A1B0GVZ3;A0A1B0GVG0;A0A1B0GU36	Aminoacylase-1; N-acyl-L-amino-acid amidohydrolase	ACY1	GOCC:0031982	Vesicle	9	2	0	0	0	0	0	2	0	0	0	0	0	0	0	0	1	0	0	0	12.196	0.0033548	2.402	0	0	0	0	0	31.9	0	0	0	0	0	0	0	0	0	296960000	9.89867e+07	0	0	0	0	#DIV/0!
A0A7I2V3W3;A0A7I2V4B3;Q13443;A0A7I2YQ97;A0A0J9YY58;A0A7I2V2Z6;F8WC54;A0AVL1;A0A7I2V5N8	Disintegrin and metalloproteinase domain-containing protein 9	ADAM9	GOCC:0031982,GOCC:0005925	Vesicle,Focal adhesion	9	4	3	1	0	3	0	0	2	1	0	3	1	0	3	0	0	2	1	0	83.43	0	17.968	8.2	2	0	8.2	0	0	5	3.1	0	260100000	110330000	0	1.23477e+08	644980000	0	0	2.14993e+08	176390000	132670000	0	103020000	2.08691
P48960	Adhesion G protein-coupled receptor E5	ADGRE5	GOCC:0031982,GOCC:0005925	Vesicle,Focal adhesion	1	2	0	0	0	1	0	1	0	0	1	0	0	0	1	0	1	0	0	1	91.868	0	8.5737	0	0	0	2.4	0	2	0	0	2	0	0	0	0	45230000	0	51070000	32100000	0	0	0	0	#DIV/0!
P49189	4-trimethylaminobutyraldehyde dehydrogenase	ALDH9A1			1	3	1	0	0	2	0	0	1	0	0	1	0	0	2	0	0	1	0	0	53.801	0.00063371	4.0529	3	0	0	5.5	0	0	2.4	0	0	85378000	0	0	2.84593e+07	139370000	0	0	4.64567e+07	59525000	0	0	1.98417e+07	2.34137
Q9UM13;D6R9Q5;A0A3B3ISY7;A0A286YEY6;D6RD74;D6RA92;D6RB36	Anaphase-promoting complex subunit 10	ANAPC10	GOCC:1902494,GOCC:1990234	Catalytic complex,Transferase complex	7	3	1	1	0	1	3	0	1	1	0	1	1	0	1	3	0	1	1	0	21.252	0	7.6943	7	7	0	7	21.6	0	7	7	0	142910000	91411000	0	78107000	205130000	277210000	0	160780000	117680000	108010000	0	75230000	2.13718
A0A087WY71;Q96CW1;E9PFW3;C9JJ47;C9JGT8;C9JJD3;C9JTK4;C9JPV8;H7C4C3	AP-2 complex subunit mu	AP2M1	GOCC:0031982	Vesicle	9	22	10	8	11	9	13	11	7	8	6	10	8	11	9	13	11	7	8	6	49.526	0	124.94	25.1	23.5	26	23.3	35.3	26.5	20.3	22.1	16.1	3731700000	2915500000	3672700000	3.43997e+09	5472000000	2960100000	3669700000	4.03393e+09	1730400000	2115500000	2117500000	1987800000	2.02935
M0R0N4;X6R390;M0QYZ2;P53680;M0R1S0;M0QZ21	AP complex subunit sigma	AP2S1	GOCC:0031982	Vesicle	6	2	1	0	1	1	1	1	0	0	1	1	0	1	1	1	1	0	0	1	17.303	0.00063553	4.1089	6.2	0	6.2	6.2	4.9	6.2	0	0	6.2	82806000	0	95702000	5.95027e+07	71790000	122340000	49533000	81221000	0	0	91182000	30394000	2.67227
A0A087WYF7;Q6UXV4	MICOS complex subunit MIC27	APOOL	GOCC:0070013,GOCC:0005739	Intracellular organelle lumen,Mitochondrion	2	2	2	1	0	2	2	1	1	2	0	2	1	0	2	2	1	1	2	0	29.205	0	16.316	12.3	5.2	0	12.3	12.3	5.2	5.2	12.3	0	321080000	104540000	0	1.41873e+08	344740000	158740000	72018000	1.91833e+08	119510000	123720000	0	8.10767e+07	2.36607
B7Z637;Q8IUR7;H7C4J4;C9J8P8;C9JAA7;C9JBY2;G5E9V7;G5E9V6	Armadillo repeat-containing protein 8	ARMC8	GOCC:1902494,GOCC:0070013,GOCC:0031982,GOCC:1990234	Catalytic complex,Intracellular organelle lumen,Vesicle,Transferase complex	8	3	0	0	0	1	0	0	1	0	1	0	0	0	1	0	0	1	0	1	67.185	0.00061996	3.7419	0	0	0	2	0	0	1.8	0	2	0	0	0	0	165070000	0	0	5.50233e+07	30342000	0	35745000	22029000	2.49777
P30530;M0R0W6	Tyrosine-protein kinase receptor UFO	AXL	GOCC:0031982	Vesicle	2	5	3	0	0	3	0	1	1	0	1	3	0	0	3	0	1	1	0	1	98.336	0	10.46	4.8	0	0	5.1	0	1.7	1.9	0	1.3	278850000	0	0	92950000	614510000	0	249090000	2.87867e+08	64211000	0	90656000	5.16223e+07	5.5764
J3KPG5;F8VU39;Q9UIF9;A0A0C4DGI9;H0YII3	Bromodomain adjacent to zinc finger domain protein 2A	BAZ2A	GOCC:1902494,GOCC:0070013	Catalytic complex,Intracellular organelle lumen	5	9	4	0	0	6	2	0	3	0	0	4	0	0	6	2	0	3	0	0	208.07	0	33.404	2.8	0	0	3.6	1.7	0	2	0	0	299060000	0	0	9.96867e+07	658150000	70183000	0	2.42778e+08	249920000	0	0	8.33067e+07	2.91426
Q9BXK5;A0A087WX97;E9PDD6;A0A087WTL4;F2Z2C3;A0A087WW80;F6VJB4;A0A0A0MR90	Bcl-2-like protein 13	BCL2L13	GOCC:0005739	Mitochondrion	8	4	0	1	0	1	3	1	0	2	0	0	1	0	1	3	1	0	2	0	52.723	0	8.2575	0	3.3	0	3.1	10.1	3.1	0	6.4	0	0	143990000	0	4.79967e+07	232330000	230560000	121130000	1.94673e+08	0	246180000	0	82060000	2.37233
Q14692	Ribosome biogenesis protein BMS1 homolog	BMS1	GOCC:0070013	Intracellular organelle lumen	1	5	0	0	4	1	0	3	1	0	1	0	0	4	1	0	3	1	0	1	145.81	0	7.1587	0	0	3.6	0.7	0	2.7	1.2	0	0.7	0	0	491270000	1.63757e+08	65112000	0	463020000	176044000	46423000	0	126350000	57591000	3.0568
Q86WA6;H7C0M3;Q49AI2;B4DML3	Valacyclovir hydrolase	BPHL	GOCC:0005739	Mitochondrion	4	5	0	2	0	0	3	0	0	2	0	0	2	0	0	3	0	0	2	0	32.542	0	12.911	0	8.9	0	0	14.1	0	0	5.8	0	0	149960000	0	4.99867e+07	0	517390000	0	1.72463e+08	0	208040000	0	6.93467e+07	2.48697
Q8WUW1	Protein BRICK1	BRK1			1	3	0	1	0	0	3	0	0	1	1	0	1	0	0	3	0	0	1	1	8.7448	0	5.6494	0	17.3	0	0	38.7	0	0	17.3	17.3	0	213510000	0	71170000	0	368410000	0	1.22803e+08	0	144430000	30649000	5.83597e+07	2.10425
F8W038;Q8IXM2;F8W1H0;H0YIS7	Chromosome 17 open reading frame 49	C17orf49	GOCC:1902494,GOCC:0070013,GOCC:1990234	Catalytic complex,Intracellular organelle lumen,Transferase complex	4	3	1	1	0	2	1	1	1	0	1	1	1	0	2	1	1	1	0	1	16.29	0	6.9347	8.9	19.7	0	28.7	8.3	8.9	19.7	0	8.9	267450000	89175000	0	118875000	568860000	48375000	56204000	2.2448e+08	101210000	0	97941000	6.63837e+07	3.38155
Q9Y426	C2 domain-containing protein 2	C2CD2			1	2	1	0	0	1	0	2	1	0	0	1	0	0	1	0	2	1	0	0	75.532	0	5.956	2.4	0	0	2.4	0	4.7	2.4	0	0	183300000	0	0	61100000	278660000	0	206730000	1.61797e+08	92040000	0	0	30680000	5.27369
P51636	Caveolin-2	CAV2	GOCC:0031982,GOCC:0031234,GOCC:0019897	Vesicle,Extrinsic component of cytoplasmic side of plasma membrane,Extrinsic component of plasma membrane	1	1	0	0	0	0	0	1	0	0	0	0	0	0	0	0	1	0	0	0	18.291	0.002026	2.7854	0	0	0	0	0	9.9	0	0	0	0	0	0	0	0	0	98830000	3.29433e+07	0	0	0	0	#DIV/0!
P45973	Chromobox protein homolog 5	CBX5	GOCC:1902494,GOCC:0070013,GOCC:0031982,GOCC:1990234	Catalytic complex,Intracellular organelle lumen,Vesicle,Transferase complex	1	2	0	0	0	0	1	0	0	0	1	0	0	0	0	1	0	0	0	1	22.225	0.00091463	3.4768	0	0	0	0	6.8	0	6.3	0	5.8	0	0	0	0	0	33701000	0	1.12337e+07	0	0	0	0	#DIV/0!
A0A3B3IRS0;E9PEC4;A0A0A0MT72;Q9BSQ5;C9JUH3	Cerebral cavernous malformations 2 protein	CCM2	GOCC:0005739	Mitochondrion	5	2	0	0	0	0	2	0	0	0	0	0	0	0	0	2	0	0	0	0	28.092	0	5.2301	0	0	0	0	14.1	0	0	0	0	0	0	0	0	0	62233000	0	2.07443e+07	0	0	0	0	#DIV/0!
Q5T8C6;A0A3B3ISD2;Q13042	Cell division cycle protein 16 homolog	CDC16	GOCC:1902494,GOCC:0072686,GOCC:1990234	Catalytic complex,Mitotic spindle,Transferase complex	3	2	0	0	0	0	2	0	0	1	0	0	0	0	0	2	0	0	1	0	54.704	0.00063735	4.1729	0	0	0	0	4.2	0	0	2.5	0	0	0	0	0	0	99806000	0	3.32687e+07	0	45683000	0	1.52277e+07	2.18475
Q9Y5S2	Serine/threonine-protein kinase MRCK beta	CDC42BPB			1	1	0	0	0	1	0	0	0	0	0	0	0	0	1	0	0	0	0	0	194.31	0.0047131	2.3003	0	0.7	0	1	0	0	0	0	0	0	0	0	0	106650000	0	0	35550000	0	0	0	0	#DIV/0!
Q00587;B0QYC6;B0QYC7;B0QYC8	Cdc42 effector protein 1	CDC42EP1	GOCC:0005925	Focal adhesion	4	4	0	1	0	2	3	0	0	1	1	0	1	0	2	3	0	0	1	1	40.294	0	26.276	0	5.1	0	12.3	15.3	0	0	5.1	5.1	0	330760000	0	1.10253e+08	578120000	182490000	0	2.53537e+08	0	202060000	0	6.73533e+07	3.76428
P22223;J3QL41;J3QR60;J3KRQ1;J3QL75	Cadherin-3	CDH3	GOCC:0019897	Extrinsic component of plasma membrane	5	15	0	0	0	6	8	13	0	0	0	0	0	0	6	8	13	0	0	0	91.417	0	226.88	0.8	0	0.8	9.7	14.7	23	0	0	0	0	0	0	0	9147100000	2273100000	27408000000	1.29427e+10	0	0	0	0	#DIV/0!
Q9NXV6;J3KNE1;D6RGD2	CDKN2A-interacting protein	CDKN2AIP	GOCC:0070013,GOCC:0031982,GOCC:1990234	Intracellular organelle lumen,Vesicle,Transferase complex	3	7	4	1	0	5	1	1	3	1	0	4	1	0	5	1	1	3	1	0	61.124	0	22.798	11.6	2.2	0	11.9	2.2	2.2	6	2.2	0	443160000	60649000	0	1.67936e+08	547540000	13945000	56163000	2.05883e+08	204990000	69081000	0	91357000	2.25361
O14578;A0A7I2V4A6;A0A7I2V4I0;A0A7I2V692;A0A7I2V4H7;H7BYJ3;A0A7I2V365;A0A7I2YQJ8;A0A7I2V2G7;A0A7I2V426;F5H4K4	Citron Rho-interacting kinase	CIT			11	13	3	1	0	8	2	0	5	0	0	3	1	0	8	2	0	5	0	0	231.43	0	75.212	1.9	0.9	0	5.3	1.6	0	4	0	0	329740000	77337000	0	1.35692e+08	980540000	277980000	0	4.19507e+08	599020000	0	0	1.99673e+08	2.10096
P08572;A0A3B3IS47	Collagen alpha-2(IV) chain	COL4A2	GOCC:0070013,GOCC:0031982	Intracellular organelle lumen,Vesicle	2	2	1	0	0	2	0	0	1	1	0	1	0	0	2	0	0	1	1	0	167.55	0.00061312	3.5606	0.8	0	0	1.6	0	0	0.8	0.8	0	331340000	0	0	1.10447e+08	1411800000	0	0	470600000	98897000	69716000	0	5.62043e+07	8.37302
A0A7I2V5Z5;Q96D53;M0R0L2;M0R001;A0A7I2V3G8;A0A7I2V544;M0R011;A0A7I2V4Z6;M0R362;A0A7I2V3W7;M0R3F7;A0A7I2V4T3;A0A7I2V3Y0;M0QZZ2	Atypical kinase COQ8B, mitochondrial	COQ8B	GOCC:0005739	Mitochondrion	14	6	5	0	1	5	2	3	1	2	4	5	0	1	5	2	3	1	2	4	48.431	0	96.85	17.7	0	2.3	17.7	7.6	9.4	2.1	7.6	11.5	871130000	0	42484000	304538000	770980000	384150000	160400000	438510000	108260000	262440000	275730000	2.15477e+08	2.03507
A0A3B3IRN8;P24311;A0A3B3ITX0	Cytochrome c oxidase subunit 7B, mitochondrial	COX7B	GOCC:0005739	Mitochondrion	3	2	1	0	0	1	0	0	0	0	0	1	0	0	1	0	0	0	0	0	6.8487	0.0096334	1.9933	11.7	0	0	11.7	0	0	0	0	0	0	0	0	0	113110000	0	0	3.77033e+07	0	0	0	0	#DIV/0!
O75718;C9JP16	Cartilage-associated protein	CRTAP	GOCC:0070013	Intracellular organelle lumen	2	6	0	0	2	0	2	3	1	0	1	0	0	2	0	2	3	1	0	1	46.561	0	11.852	0	0	6.5	0	3.7	9	2	0	2	0	0	168360000	56120000	0	56654000	195860000	8.41713e+07	41021000	0	73961000	3.83273e+07	2.19612
Q9NRF8	CTP synthase 2	CTPS2			1	2	0	2	0	0	1	0	0	2	0	0	2	0	0	1	0	0	2	0	65.677	0	10.269	0	4.6	0	0	2.6	0	0	4.6	0	0	203930000	0	6.79767e+07	0	348880000	0	1.16293e+08	0	161840000	0	5.39467e+07	2.15571
A0A7I2YQT5;A0A7I2V6E3;A0A7I2V466;A0A7I2V2Q8;P53634;A0A7I2V5C5;H0YCY8	Cathepsin C	CTSC	GOCC:0070013,GOCC:0031982	Intracellular organelle lumen,Vesicle	7	2	1	0	0	1	0	0	0	0	0	1	0	0	1	0	0	0	0	0	38.535	0.00061218	3.5373	3.5	0	0	5.8	0	0	0	0	0	64513000	0	0	2.15043e+07	129710000	0	0	4.32367e+07	0	0	0	0	#DIV/0!
H3BSW6;Q2VPK5	Cytoplasmic tRNA 2-thiolation protein 2	CTU2			2	2	0	0	0	0	0	2	0	0	0	0	0	0	0	0	2	0	0	0	63.681	0	5.3995	0	0	0	0	0	4.9	0	0	0	0	0	0	0	0	0	50283000	16761000	0	0	0	0	#DIV/0!
H0YE03;H7C3G7;Q2TBE0	CWF19-like protein 2	CWF19L2			3	2	0	0	0	0	1	0	1	1	0	0	0	0	0	1	0	1	1	0	63.569	0.0020498	2.9425	0	0	0	0	1.4	0	2.5	2.5	0	0	0	0	0	0	5415600000	0	1805200000	24262000	19289000	0	14517000	124.351
Q9BQA9;J3QKZ6;H0Y2X1;J3KTI1;J3KSB6;J3KS78;J3QS53;J3QRZ2;J3QLB7;J3QKS6;J3QRG5;J3KSJ5	Cytochrome b-245 chaperone 1	CYBC1			12	2	0	0	1	0	0	2	1	0	0	0	0	1	0	0	2	1	0	0	20.774	0.002022	2.7661	0	0	4.3	0	0	8.6	4.3	0	0	0	0	47783000	1.59277e+07	0	0	287280000	95760000	113850000	0	0	37950000	2.52332
E9PHG5;Q6UW02;F8WBE2;C9J8K7;Q8WZ13	Cytochrome P450 20A1	CYP20A1			5	3	1	0	1	3	0	1	0	1	0	1	0	1	3	0	1	0	1	0	53.448	0	7.0179	3	0	1.7	7	0	3	0	3	0	26695000	0	0	8.89833e+06	191920000	0	75393000	8.91043e+07	0	63944000	0	2.13147e+07	4.18042
F5H895;A0A0B4J239;F5GXX5;P61803	Dolichyl-diphosphooligosaccharide--protein glycosyltransferase subunit DAD1	DAD1	GOCC:1902494,GOCC:1990234	Catalytic complex,Transferase complex	4	2	0	0	0	0	0	2	0	0	0	0	0	0	0	0	2	0	0	0	7.2883	0.0011898	3.1852	0	0	0	0	0	33.8	0	0	0	0	0	0	0	0	0	369640000	1.23213e+08	0	0	0	0	#DIV/0!
P61962;A0A087WWI6	DDB1- and CUL4-associated factor 7	DCAF7	GOCC:1902494,GOCC:0070013,GOCC:1990234	Catalytic complex,Intracellular organelle lumen,Transferase complex	2	7	2	0	1	3	2	2	1	1	0	2	0	1	3	2	2	1	1	0	38.926	0	12.575	7	0	4.7	9.4	7.6	8.2	4.4	2.3	0	571360000	0	52340000	207900000	579720000	182790000	207900000	323470000	280250000	66418000	0	115556000	2.79925
Q9NPI6;A0A087WT55	mRNA-decapping enzyme 1A	DCP1A			2	4	1	2	0	2	1	0	0	0	1	1	2	0	2	1	0	0	0	1	63.278	0	54.301	3.6	5	0	6.2	2.1	0	0	0	3.6	161490000	145910000	0	1.02467e+08	244780000	140260000	0	1.28347e+08	0	0	169520000	5.65067e+07	2.27135
H0Y9F4;A0A0G2JI85;A0A0G2JNZ7;A0A0A0MSX3;Q08345	Epithelial discoidin domain-containing receptor 1	DDR1			5	1	0	0	0	0	1	0	0	0	0	0	0	0	0	1	0	0	0	0	30.784	0.0065808	2.208	0	0	0	0	3.6	0	0	0	0	0	0	0	0	0	19371000	0	6457000	0	0	0	0	#DIV/0!
H0Y8L8;A0A499FJW5;Q9UJV9	Probable ATP-dependent RNA helicase DDX41	DDX41	GOCC:1902494	Catalytic complex	3	2	1	0	0	1	0	1	0	0	1	1	0	0	1	0	1	0	0	1	19.375	0.00062873	3.9325	6.4	0	0	6.4	0	6.4	0	0	6.9	77080000	0	0	2.56933e+07	104350000	0	63998000	56116000	0	0	74135000	2.47117e+07	2.27083
Q96HY7;H7C1J3;H7C149;C9JWN1	Probable 2-oxoglutarate dehydrogenase E1 component DHKTD1, mitochondrial	DHTKD1	GOCC:0070013,GOCC:0005739,GOCC:0005759	Intracellular organelle lumen,Mitochondrion,Mitochondrial matrix	4	5	0	0	0	2	2	0	1	0	0	0	0	0	2	2	0	1	0	0	103.08	0	32.452	0	0	0	2.7	2.6	0	2.4	0	0	0	0	0	0	231530000	96927000	0	1.09486e+08	41894000	0	0	1.39647e+07	7.84019
H7BXY3;Q7L2E3	ATP-dependent RNA helicase DHX30	DHX30	GOCC:0070013,GOCC:0005739,GOCC:0005759	Intracellular organelle lumen,Mitochondrion,Mitochondrial matrix	2	7	3	3	1	4	2	1	4	1	0	3	3	1	4	2	1	4	1	0	130.55	0	48.344	2.6	2.9	0.9	3.3	1.6	0.9	3.4	0.9	0	530220000	129940000	64314000	2.41491e+08	742790000	106650000	56823000	3.02088e+08	314980000	121550000	0	145510000	2.07606
P15924	Desmoplakin	DSP	GOCC:0031982	Vesicle	1	109	50	24	29	78	19	31	48	14	11	50	24	29	78	19	31	48	14	11	331.77	0	323.31	21	11.3	11.4	29.4	8	12.6	22.2	6.1	4.4	11693000000	2843200000	3042100000	5.85943e+09	26420000000	1625700000	4209600000	1.07518e+10	9890100000	1376300000	923680000	4063360000	2.64603
A0A5F9ZI63;O75530;E9PJK2	Polycomb protein EED	EED	GOCC:1902494,GOCC:0070013,GOCC:1990234	Catalytic complex,Intracellular organelle lumen,Transferase complex	3	4	0	1	0	1	3	0	1	1	0	0	1	0	1	3	0	1	1	0	56.294	0	5.1952	0	1.8	0	2.8	6.2	0	1.8	1.8	0	0	53431000	0	1.78103e+07	78467000	174460000	0	84309000	38942000	52065000	0	3.03357e+07	2.7792
G3V195;B7WPE2;Q32P44;H7C355;G3V1D0;H0Y3M3	Echinoderm microtubule associated protein like 3, isoform CRA_c	EML3	GOCC:0072686	Mitotic spindle	6	2	0	1	0	0	2	1	0	0	1	0	1	0	0	2	1	0	0	1	73.281	0.0012026	3.3188	0	2.4	0	0	4	2.4	0	0	2.4	0	46662000	0	15554000	0	63025000	35247000	3.27573e+07	0	0	24663000	8221000	3.98459
Q9HCM4	Band 4.1-like protein 5	EPB41L5			1	2	0	0	0	1	1	0	0	0	0	0	0	0	1	0	0	0	0	0	81.855	0.00061843	3.7013	0	0	0	2	1.1	0	0	0	0	0	0	0	0	136320000	63356000	0	6.65587e+07	0	0	0	0	#DIV/0!
X6RM00;G8JLD3;X6RLX0;Q8IUD2;K7EPP6;K7EKH8;K7EIZ7;H7C4G9;O15083	ELKS/Rab6-interacting/CAST family member 1	ERC1	GOCC:1902494,GOCC:0031982,GOCC:1990234	Catalytic complex,Vesicle,Transferase complex	9	6	2	2	0	2	0	0	0	2	0	2	2	0	2	0	0	0	2	0	111.97	0	42.335	4.3	2.4	0	3.8	0	0	0	2.6	0	182700000	73655000	0	8.54517e+07	1175900000	0	0	3.91967e+08	0	240780000	0	80260000	4.88371
A0A2R8Y6W8;P19447;A0A2R8Y681	DNA excision repair protein ERCC-3	ERCC3	GOCC:1902494,GOCC:0070013,GOCC:1990234	Catalytic complex,Intracellular organelle lumen,Transferase complex	3	5	2	1	1	3	0	2	2	0	3	2	1	1	3	0	2	2	0	3	91.957	0	36.378	4.5	2.6	1.2	5.5	0	3.8	4.5	0	3.1	443110000	139090000	96055000	226085000	815290000	0	269940000	3.61743e+08	203250000	0	288270000	163840000	2.20791
Q969X5	Endoplasmic reticulum-Golgi intermediate compartment protein 1	ERGIC1			1	2	0	0	0	1	0	2	0	0	1	0	0	0	1	0	2	0	0	1	32.592	0.0075984	2.136	0	0	0	4.8	0	7.9	0	0	4.8	0	0	0	0	86496000	0	192070000	9.28553e+07	0	0	111740000	3.72467e+07	2.49298
E9PS00;Q9Y5Q0	Fatty acid desaturase 3	FADS3			2	2	0	0	0	0	2	0	0	0	0	0	0	0	0	2	0	0	0	0	48.166	0	5.0192	0	0	0	0	8.2	0	0	0	0	0	0	0	0	0	131010000	0	43670000	0	0	0	0	#DIV/0!
H7BXJ4;Q0JRZ9	F-BAR domain only protein 2	FCHO2	GOCC:0031982	Vesicle	2	1	0	0	0	0	1	0	0	0	0	0	0	0	0	1	0	0	0	0	43.42	0.0068046	2.1567	0	0	0	0	2.6	0	0	0	0	0	0	0	0	0	25506000	0	8502000	0	0	0	0	#DIV/0!
Q8N0W3;I3L3J1;I3L106;I3L171;I3L1X0;J3KSP6	L-fucose kinase	FCSK			6	2	0	0	0	0	2	0	0	0	0	0	0	0	0	2	0	0	0	0	117.62	0.0017632	2.9936	0	0	0	0	2.7	0	0	0	0	0	0	0	0	0	78598000	0	2.61993e+07	0	0	0	0	#DIV/0!
H0YJ34;Q96AC1;A0A0U1RRM8;G3V5R2;H0YJB6;G3V281;G3V3J0	Fermitin family homolog 2	FERMT2	GOCC:0031234,GOCC:0005925,GOCC:0019897	Extrinsic component of cytoplasmic side of plasma membrane,Focal adhesion,Extrinsic component of plasma membrane	7	3	1	0	0	0	1	0	0	1	0	1	0	0	0	1	0	0	1	0	73.352	0.0012055	3.343	4.4	0	0	0	1.2	0	0	2.5	0	0	0	0	0	0	159650000	0	5.32167e+07	0	44266000	0	1.47553e+07	3.60661
Q5T196;Q8NFF5	FAD synthase	FLAD1			2	2	0	0	0	2	0	1	0	0	1	0	0	0	2	0	1	0	0	1	50.141	0	22.994	0	0	0	6.6	0	4.6	0	0	4.6	0	0	0	0	423780000	0	91019000	1.716e+08	0	0	61553000	2.05177e+07	8.36351
J3QLD9;E7EMK3;Q14254;K7EKW9	Flotillin-2	FLOT2	GOCC:0031982,GOCC:0005925	Vesicle,Focal adhesion	4	4	0	0	0	3	1	0	2	1	0	0	0	0	3	1	0	2	1	0	47.142	0	9.9963	0	0	0	10	4.7	0	5.4	3.3	0	0	0	0	0	430740000	121760000	0	1.84167e+08	151350000	79586000	0	7.69787e+07	2.39244
Q06787	Synaptic functional regulator FMR1	FMR1	GOCC:0070013,GOCC:0019897	Intracellular organelle lumen,Extrinsic component of plasma membrane	1	2	0	0	0	2	0	1	0	0	0	0	0	0	2	0	1	0	0	0	71.174	0.0020237	2.7778	1.3	5.2	1.3	7.6	4.7	4.3	5.2	7.9	1.3	0	0	0	0	102210000	0	0	34070000	0	0	0	0	#DIV/0!
O14908;K7EM11	PDZ domain-containing protein GIPC1	GIPC1	GOCC:0031982	Vesicle	2	2	1	0	0	0	1	1	1	0	1	1	0	0	0	1	1	1	0	1	36.049	0	6.2047	3.6	0	0	0	4.5	3.6	4.5	0	3.6	96719000	0	0	3.22397e+07	0	88962000	74409000	54457000	0	0	80505000	26835000	2.02933
Q14344	Guanine nucleotide-binding protein subunit alpha-13	GNA13	GOCC:1902494,GOCC:0031234,GOCC:0005925,GOCC:0019897	Catalytic complex,Extrinsic component of cytoplasmic side of plasma membrane,Focal adhesion,Extrinsic component of plasma membrane	1	6	3	3	1	2	4	0	1	1	1	3	3	1	2	4	0	1	1	1	44.049	0	29.872	9.5	11.9	2.7	6.4	20.7	0	2.7	2.7	2.7	492300000	495480000	41515000	3.43098e+08	537890000	917050000	0	484980000	242000000	238820000	74165000	184995000	2.62158
P50148;B1AM21;O95837	Guanine nucleotide-binding protein G(q) subunit alpha	GNAQ	GOCC:1902494,GOCC:0031982,GOCC:0031234,GOCC:0019897	Catalytic complex,Vesicle,Extrinsic component of cytoplasmic side of plasma membrane,Extrinsic component of plasma membrane	3	2	1	0	0	1	2	0	1	0	0	1	0	0	1	2	0	1	0	0	42.142	0.00032626	4.5998	3.9	0	0	3.9	10.3	0	7	3.1	0	50290000	0	0	1.67633e+07	56775000	169090000	0	7.52883e+07	35762000	0	0	1.19207e+07	6.31578
P00505	Aspartate aminotransferase, mitochondrial	GOT2	GOCC:0070013,GOCC:0031982,GOCC:0005759	Intracellular organelle lumen,Vesicle,Mitochondrial matrix	1	3	0	0	0	1	0	3	0	0	2	0	0	0	1	0	3	0	0	2	47.517	0	6.6103	0	0	0	2.8	0	9.5	0	0	6	0	0	0	0	68045000	0	144770000	7.09383e+07	0	0	90702000	30234000	2.34631
A0A2R8Y5P7;P49590;A0A2R8Y3N3;D6RB22;A0A2R8Y6I1;B4DQ67;A0A2R8Y5E8;D6RJE6;A0A6Q8PF07;A0A6Q8PFF2;A0A6Q8PHA5;A0A6Q8PF47;E7ETE2;P12081;A0A2R8Y4X6;A0A6Q8PFG9;A0A6Q8PFN6;B4E1C5;A0A6Q8PHE3;B4DDD8	Histidine--tRNA ligase; Histidine--tRNA ligase, mitochondrial	HARS2	GOCC:0070013,GOCC:0005739,GOCC:0005759	Intracellular organelle lumen,Mitochondrion,Mitochondrial matrix	20	9	4	1	0	4	3	0	2	1	0	4	1	0	4	3	0	2	1	0	57.531	0	24.704	9.2	2.1	0	9.2	8.2	0	5.3	2.9	0	292480000	38682000	0	1.10387e+08	738050000	251080000	0	329710000	196530000	72258000	0	89596000	3.67996
O94927	HAUS augmin-like complex subunit 5	HAUS5	GOCC:0072686	Mitotic spindle	1	2	0	0	0	0	1	0	0	1	1	0	0	0	0	1	0	0	1	1	71.682	0.00062735	3.8799	0	0	0	0	1.4	0	0	2.1	2.1	0	0	0	0	0	275530000	0	9.18433e+07	0	70864000	52798000	4.12207e+07	2.22809
O15379	Histone deacetylase 3	HDAC3	GOCC:1902494,GOCC:0072686	Catalytic complex,Mitotic spindle	1	3	1	0	0	1	2	0	0	1	1	1	0	0	1	2	0	0	1	1	48.847	0	11.925	2.6	0	0	4.4	8.2	0	1.9	2.6	3.5	69904000	0	0	2.33013e+07	85340000	58424000	0	4.79213e+07	0	0	54744000	18248000	2.62611
A0A7P0TAN5;A0A7P0TA78;A0A7P0TAC5;P42858;A0A7P0Z417	Huntingtin	HTT	GOCC:0031982	Vesicle	5	2	0	0	0	1	0	1	0	0	1	0	0	0	1	0	1	0	0	1	318.02	0.00061977	3.7411	0	0	0	0.2	0	0.6	0	0	0.6	0	0	0	0	126420000	0	33935000	5.34517e+07	0	0	27067000	9.02233e+06	5.92437
A0A7I2V634;A0A7I2V4A4;A0A7I2YQS6;A0A7I2V612;A0A7I2V373;A0A7I2V2S1;A0A7I2V4Q3;A0A7I2V610;A0A7I2V3E3;A0A7I2V2P6;A0A7I2YQV5;A0A3B3ISG5;P14735	Insulin-degrading enzyme	IDE	GOCC:0005739	Mitochondrion	13	3	1	1	0	1	1	0	0	1	0	1	1	0	1	1	0	0	1	0	43.614	0.00091047	3.4261	2.1	5.5	0	3.1	2.1	0	0	2.1	0	45334000	50215000	0	3.18497e+07	278740000	29144000	0	102628000	0	48993000	0	16331000	6.28424
Q9UL03;B3KQH5;C9JXP6;C9J885;C9K0V7;C9JVX2;F8WAV7;G5E9X1;A0A1W2PPI5;Q5JSJ4	Integrator complex subunit 6	INTS6			10	4	0	1	1	1	3	1	2	1	1	0	1	1	1	3	1	2	1	1	100.39	0	17.573	0	1.1	1.1	1.1	5.6	1.1	2.9	1.1	1.1	0	130510000	144460000	9.16567e+07	153240000	1418500000	84711000	5.5215e+08	213870000	138100000	0	1.17323e+08	4.70623
H0Y8E4;E9PH70;A0A1W2PPB7;Q9ULH0;H7C584;A0A1W2PPY4	Kinase D-interacting substrate of 220 kDa	KIDINS220	GOCC:0031982	Vesicle	6	2	0	0	0	0	1	0	0	0	1	0	0	0	0	1	0	0	0	1	118.38	0.00062893	3.9374	0	0	0	0	1.1	0	0	0	1.1	0	0	0	0	0	35222000	0	1.17407e+07	0	0	0	0	#DIV/0!
Q9NS87;H7BZT2;C9JKA9	Kinesin-like protein KIF15	KIF15	GOCC:0072686	Mitotic spindle	3	2	0	0	0	0	2	0	0	0	0	0	0	0	0	2	0	0	0	0	160.16	0.0078569	2.1218	0	0	0	0	1.2	0	0	0	0	0	0	0	0	0	910210000	0	3.03403e+08	0	0	0	0	#DIV/0!
H3BRB3;Q14807;H3BTH5	Kinesin-like protein KIF22	KIF22	GOCC:0072686	Mitotic spindle	3	2	1	0	0	2	0	0	0	0	1	1	0	0	2	0	0	0	0	1	67.752	0.00032082	4.2919	2.5	0	0	4.3	0	0	0	0	2.5	50792000	0	0	1.69307e+07	180700000	0	0	6.02333e+07	0	0	32693000	1.08977e+07	5.52718
E9PPJ1;Q8NG31;H0YCZ2	Kinetochore scaffold 1	KNL1	GOCC:0031982	Vesicle	3	3	1	0	0	2	0	0	1	0	0	1	0	0	2	0	0	1	0	0	195.64	0.00063877	4.1917	1	0	0	1.7	0	0	0.6	0	0	55098000	0	0	18366000	186850000	0	0	6.22833e+07	61083000	0	0	20361000	3.05895
Q5T749	Keratinocyte proline-rich protein	KPRP			1	2	0	0	0	0	0	2	0	0	0	0	0	0	0	0	2	0	0	0	64.135	0	15.869	0	0	0	0	0	6.2	0	0	0	0	0	0	0	0	0	248230000	8.27433e+07	0	0	0	0	#DIV/0!
P01116	GTPase KRas	KRAS	GOCC:0005739,GOCC:0031234,GOCC:0005925,GOCC:0019897	Mitochondrion,Extrinsic component of cytoplasmic side of plasma membrane,Focal adhesion,Extrinsic component of plasma membrane	1	2	0	0	0	1	0	0	0	1	0	0	0	0	0	0	0	0	1	0	21.656	0.0022721	2.5963	6.3	6.3	6.3	20.1	6.3	6.3	25.9	19.6	6.3	0	0	0	0	207280000	0	0	6.90933e+07	0	83901000	0	27967000	2.47053
A0A494C108;Q8N9T8	Protein KRI1 homolog	KRI1			2	2	0	0	1	0	0	2	0	0	0	0	0	1	0	0	2	0	0	0	83.251	0.0020546	2.9743	0	0	1.3	0	0	3.4	0	0	0	0	0	0	0	0	0	198390000	66130000	0	0	0	0	#DIV/0!
Q13753	Laminin subunit gamma-2	LAMC2			1	15	8	2	1	9	6	2	3	5	3	8	2	1	9	6	2	3	5	3	130.97	0	88.071	9.1	2.8	1.3	10.7	8.4	2.1	3.8	5.8	3.1	884590000	229580000	66142000	3.93437e+08	1633900000	290750000	112250000	6.78967e+08	255910000	579850000	167340000	3.34367e+08	2.03061
Q4G0J3;D6RFF0;H0YA82;D6R9Z6	La-related protein 7	LARP7	GOCC:1902494,GOCC:1990234	Catalytic complex,Transferase complex	4	9	3	3	0	5	3	0	3	2	0	3	3	0	5	3	0	3	2	0	66.898	0	24.321	7	9.6	0	11.9	7.7	0	8.6	5.8	0	338650000	245820000	0	1.94823e+08	703660000	218340000	0	3.07333e+08	227020000	228700000	0	1.51907e+08	2.02317
X6R8F3;P80188	Neutrophil gelatinase-associated lipocalin	LCN2	GOCC:0031982	Vesicle	2	2	1	0	0	0	1	1	0	0	0	1	0	0	0	1	1	0	0	0	22.788	0	15.25	7.5	0	0	0	8.5	8.5	0	0	0	0	0	0	0	0	60043000	56448000	3.88303e+07	0	0	0	0	#DIV/0!
Q9Y383;V9GZ75;F8WEU3	Putative RNA-binding protein Luc7-like 2	LUC7L2			3	22	3	7	11	3	4	15	3	7	8	1	0	1	1	0	1	1	1	1	46.513	0	125.26	7.9	21.7	26.8	8.2	12.8	33.2	8.9	20.9	20.4	277680000	1184300000	3701800000	1721260000	411930000	602880000	5932100000	2.31564e+09	419620000	854450000	1758500000	1.01086e+09	2.29077
Q14210	Lymphocyte antigen 6D	LY6D			1	2	0	0	0	0	0	2	0	0	0	0	0	0	0	0	2	0	0	0	13.286	0	5.1337	0	0	0	0	0	16.4	0	0	0	0	0	0	0	0	0	120630000	40210000	0	0	0	0	#DIV/0!
Q9Y6D9;C9JKI7	Mitotic spindle assembly checkpoint protein MAD1	MAD1L1	GOCC:0072686	Mitotic spindle	2	2	0	0	1	1	0	0	0	0	0	0	0	1	1	0	0	0	0	0	83.066	0	5.4495	0	0	1.5	2.6	0	0	0	0	0	0	0	0	0	100830000	0	0	33610000	0	0	0	0	#DIV/0!
D6RE80;B4DQT1;B4DVN3;E7ESC7;Q7L5Y9;D6RA86;D6RID6;D6RDW4;D6REW7;D6RIB6	E3 ubiquitin-protein transferase MAEA	MAEA	GOCC:1902494,GOCC:1990234	Catalytic complex,Transferase complex	10	2	0	0	0	1	1	1	0	0	1	0	0	0	1	1	1	0	0	1	20.944	0	17.748	0	0	0	11.5	8.2	11.5	0	0	11.5	0	0	0	0	271060000	25866000	29505000	1.0881e+08	0	0	78926000	2.63087e+07	4.13591
P40926;G3XAL0	Malate dehydrogenase, mitochondrial	MDH2	GOCC:0005739,GOCC:0005759	Mitochondrion,Mitochondrial matrix	2	4	0	1	0	3	0	2	2	1	0	0	1	0	3	0	2	2	1	0	35.503	0	39.831	0	6.5	0	13.3	0	9.8	9.8	3.6	0	0	154880000	0	5.16267e+07	446020000	0	306290000	250770000	313220000	61626000	0	1.24949e+08	2.00698
M0QZQ2;Q71SY5;M0QYR4	Mediator of RNA polymerase II transcription subunit 25	MED25			3	2	1	0	0	1	0	1	1	0	0	1	0	0	1	0	1	1	0	0	84.584	0.0022631	2.5456	2.6	0	0	2.3	0	2.3	2.3	0	0	101460000	0	0	33820000	179850000	0	86346000	88732000	77733000	0	0	25911000	3.42449
A6NJ78;A0A0U1RRF2;B5MC64;A0A0U1RR64;A0A0U1RRD2;F8WD83;A0A0U1RR76;P0C7V9	12S rRNA N4-methylcytidine (m4C) methyltransferase	METTL15	GOCC:0005739,GOCC:0005759	Mitochondrion,Mitochondrial matrix	8	5	1	2	0	2	3	1	0	2	1	1	2	0	2	3	1	0	2	1	46.121	0	28.899	4.9	7.6	0	8.1	10.3	3.2	0	7.9	3.4	50874000	231370000	0	9.40813e+07	138130000	149640000	90383000	126051000	0	105550000	64655000	56735000	2.22175
F8VQX6;H0YI09;Q9H8H3	Methyltransferase-like protein 7A	METTL7A	GOCC:0031982	Vesicle	3	2	1	0	1	0	1	2	0	0	1	1	0	1	0	1	2	0	0	1	20.662	0	7.552	6.7	0	6.7	0	6.7	15	0	0	6.7	90997000	0	104930000	65309000	0	38937000	342290000	1.27076e+08	0	0	122700000	40900000	3.10698
Q5VV89;O14880;Q5VV87	Microsomal glutathione S-transferase 3	MGST3			3	3	0	1	0	0	2	1	0	1	0	0	1	0	0	2	1	0	1	0	18.416	0	19.408	0	14.5	0	0	14.5	4.8	0	14.5	0	0	502140000	0	167380000	0	745220000	648420000	4.64547e+08	0	473100000	0	157700000	2.94576
A0A1C7CYX1;Q6PJG2;A0A0A0MSU2;H7C1L3;C9JYU7	Mitotic deacetylase-associated SANT domain protein	MIDEAS			5	26	18	4	2	21	7	0	9	5	3	18	4	2	21	7	0	9	5	3	120.73	0	293.35	22.2	9	2.8	26.3	12.5	0	16.9	8.2	3.6	4133700000	614760000	89080000	1.61251e+09	5829600000	710410000	0	2.18e+09	1641200000	828690000	552950000	1.00761e+09	2.16353
Q99797	Mitochondrial intermediate peptidase	MIPEP	GOCC:0005739,GOCC:0005759	Mitochondrion,Mitochondrial matrix	1	13	5	2	4	6	1	5	3	0	6	5	2	4	6	1	5	3	0	6	80.64	0	38.803	7.9	3.1	6.6	7.9	2.8	6.7	4.6	0	8.3	825210000	135910000	513800000	491640000	1369700000	129670000	1080200000	8.59857e+08	444170000	0	834530000	4.26233e+08	2.01734
R4GN43;A0A2Y9D025;P56556	Complex I-B14	NDUFA6	GOCC:1902494,GOCC:0005739	Catalytic complex,Mitochondrion	3	2	0	0	0	0	1	0	1	0	0	0	0	0	0	1	0	1	0	0	8.5099	0.0078506	2.1116	0	0	0	0	15.5	0	11.3	0	0	0	0	0	0	0	171550000	0	5.71833e+07	69869000	0	0	2.32897e+07	2.45531
P20929;H0Y786;H7C2B3;H7BZD5	Nebulin	NEB			4	4	1	0	1	3	0	2	0	0	2	1	0	1	3	0	2	0	0	2	772.91	0	5.7533	0.1	0	0.1	0.5	0	0.3	0	0	0.3	686400000	0	289790000	3.25397e+08	5787600000	0	1719700000	2.50243e+09	0	0	894000000	298000000	8.39743
O75323;F8WBI5;H7C333;C9J7B1;C9K068	Protein NipSnap homolog 2	NIPSNAP2	GOCC:0005739	Mitochondrion	5	6	2	0	2	3	6	3	2	3	2	2	0	2	3	6	3	2	3	2	33.742	0	21.177	7.3	0	11.5	12.2	23.8	15	7.3	12.2	10.1	510750000	0	125480000	2.12077e+08	527500000	1933000000	243660000	9.01387e+08	195540000	278530000	160720000	2.11597e+08	4.25993
Q8NC60	Nitric oxide-associated protein 1	NOA1	GOCC:0005739	Mitochondrion	1	12	6	5	1	7	3	4	2	5	1	6	5	1	7	3	4	2	5	1	78.457	0	80.775	11.5	8.5	2.1	14.3	8.5	7.7	4.4	10.7	2.1	1543000000	831080000	118160000	8.30747e+08	2423200000	442600000	288570000	1.05146e+09	399930000	1000100000	111870000	5.03967e+08	2.08636
O60462;C9JH98	Neuropilin-2	NRP2			2	2	0	0	1	0	0	2	0	1	1	0	0	1	0	0	2	0	1	1	104.83	0.0011947	3.2358	0	0	0.9	0	0	2.6	0	0.9	0.9	0	0	41468000	1.38227e+07	0	0	3943400000	1.31447e+09	0	29401000	57433000	2.89447e+07	45.4131
O95747;C9JIG9	Serine/threonine-protein kinase OSR1	OXSR1			2	4	1	1	0	1	1	0	0	1	0	1	1	0	1	1	0	0	1	0	58.022	0	5.5837	2.7	1.7	0	1.7	1.5	0	0	1.7	0	0	65522000	0	2.18407e+07	314520000	29868000	0	114796000	0	49046000	0	1.63487e+07	7.02173
G5E9U9;Q9H0J9	Protein mono-ADP-ribosyltransferase PARP12	PARP12			2	2	0	0	0	1	0	1	0	0	0	0	0	0	1	0	1	0	0	0	47.485	0	5	0	1.9	0	2.1	1.9	6.2	0	1.9	0	0	0	0	0	48374000	0	6196400	1.81901e+07	0	0	0	0	#DIV/0!
Q8NCN5;A8MT40;H3BQG3;H3BUH3;B7ZAR9	Pyruvate dehydrogenase phosphatase regulatory subunit, mitochondrial	PDPR	GOCC:1902494,GOCC:1990234	Catalytic complex,Transferase complex	5	8	4	0	1	6	3	1	3	1	0	4	0	1	6	3	1	3	1	0	99.363	0	25.761	6.3	0	1.5	8.4	4.2	0.8	4.4	1.5	0	821800000	0	88709000	303503000	2879100000	209820000	62930000	1.05062e+09	335290000	84462000	0	1.39917e+08	7.50884
P07737;K7EJ44;I3L3D5	Profilin-1	PFN1	GOCC:0031982,GOCC:0005925	Vesicle,Focal adhesion	3	5	1	2	0	1	1	2	3	1	0	1	2	0	1	1	2	3	1	0	15.054	0	14.952	7.9	22.9	0	7.9	7.9	17.9	29.3	7.9	0	17472000	139200000	0	52224000	25467000	14099000	445210000	161592000	207110000	19528000	0	75546000	2.13899
C9J712;P35080;C9JQ45;C9J2N0	Profilin-2	PFN2			4	1	0	0	0	0	1	1	0	0	0	0	0	0	0	1	1	0	0	0	9.7982	0	4.9774	17.6	17.6	17.6	15.4	29.7	27.5	17.6	17.6	17.6	0	0	0	0	0	68475000	52751000	4.04087e+07	0	0	0	0	#DIV/0!
Q86SQ0;E9PFQ4;A0A1W2PQ63;E9PGF6;A0A1W2PRT1;G5E9V3;A0A1W2PRJ2;E9PDY7	Pleckstrin homology-like domain family B member 2	PHLDB2			8	9	4	0	1	9	0	1	3	1	1	4	0	1	9	0	1	3	1	1	142.16	0	52.605	4.5	0	1.7	10.5	0	1.7	3.6	1	1	633490000	0	72191000	235227000	1717500000	0	44981000	5.87494e+08	307180000	59426000	56046000	140884000	4.17005
Q8N3E9;H0YGF8;F5GXC1;K7EQF2	1-phosphatidylinositol 4,5-bisphosphate phosphodiesterase delta-3	PLCD3			4	7	2	1	1	2	4	3	0	1	2	2	1	1	2	4	3	0	1	2	89.257	0	14.197	2.2	1.8	1.1	2.2	8	4.7	0	1.1	4.3	187920000	62074000	71743000	1.07246e+08	163250000	235320000	199820000	1.99463e+08	0	125860000	145940000	90600000	2.20158
O00411;K7EMH3	DNA-directed RNA polymerase, mitochondrial	POLRMT	GOCC:1902494,GOCC:0005739,GOCC:1990234,GOCC:0005759	Catalytic complex,Mitochondrion,Transferase complex,Mitochondrial matrix	2	4	0	0	0	2	2	0	0	0	0	0	0	0	2	2	0	0	0	0	138.62	0.0006398	4.2335	0	0	0	1.5	2.3	0	0	0	0	0	0	0	0	82398000	97618000	0	6.00053e+07	0	0	0	0	#DIV/0!
P30044	Peroxiredoxin-5, mitochondrial	PRDX5	GOCC:0005739,GOCC:0031982,GOCC:0005759	Mitochondrion,Vesicle,Mitochondrial matrix	1	3	0	0	1	0	1	2	0	1	1	0	0	1	0	1	2	0	1	1	22.086	0	5.1356	0	0	5.1	0	7.5	11.7	0	5.1	5.1	0	0	169900000	5.66333e+07	0	96180000	250650000	115610000	0	57931000	111350000	56427000	2.04884
A0A7I2YQ87;A0A7I2V5H3;O75569;G5E9Q4;A0A7I2V5C2;A0A7I2V3L6;A0A7I2V315;A0A7I2V2P4;F8WEG8;C9JMM3;A0A7I2V593;B4DJC7;A0A7I2V2I8;A0A7I2V3J2;A0A7I2V332	Interferon-inducible double-stranded RNA-dependent protein kinase activator A	PRKRA	GOCC:1902494,GOCC:1990234	Catalytic complex,Transferase complex	15	6	2	5	0	2	4	0	1	3	0	2	5	0	2	4	0	1	3	0	19.52	0	34.632	14.1	43.5	0	14.1	35.6	0	10.7	28.2	0	219480000	675700000	0	2.98393e+08	236300000	813560000	0	3.49953e+08	88060000	420280000	0	1.69447e+08	2.06527
O15091;A0A0A0MTQ0	Mitochondrial ribonuclease P catalytic subunit	PRORP	GOCC:1902494,GOCC:0070013,GOCC:0005739,GOCC:0005759	Catalytic complex,Intracellular organelle lumen,Mitochondrion,Mitochondrial matrix	2	5	1	0	0	3	1	2	1	0	1	1	0	0	3	1	2	1	0	1	67.315	0	19.618	2.4	0	0	6.7	2.7	5.1	2.7	0	2.4	90109000	0	0	3.00363e+07	485200000	83064000	227650000	2.65305e+08	0	0	87220000	2.90733e+07	9.12536
Q13523;H0YDJ3	Serine/threonine-protein kinase PRP4 homolog	PRPF4B	GOCC:1902494,GOCC:0070013	Catalytic complex,Intracellular organelle lumen	2	7	1	2	1	1	1	4	4	2	0	1	2	1	1	1	4	4	2	0	116.99	0	29.611	1	2.6	1	1	1.6	4.9	5.2	2.6	0	75347000	107510000	80754000	8.78703e+07	83461000	144000000	592890000	2.7345e+08	163650000	120880000	0	9.48433e+07	2.88318
P28074;G8JLC2;G3V3K3;H0YJM8	Proteasome subunit beta type-5	PSMB5	GOCC:1902494	Catalytic complex	4	2	0	0	0	1	0	1	0	0	0	0	0	0	1	0	1	0	0	0	28.48	0.0022812	2.6231	0	0	0	5.7	0	3.8	0	0	0	0	0	0	0	75992000	0	45253000	40415000	0	0	0	0	#DIV/0!
A0A087X1Z3;Q9UL46;H0YM70	Proteasome activator complex subunit 2	PSME2	GOCC:1902494	Catalytic complex	3	2	0	0	0	0	1	0	0	0	1	0	0	0	0	1	0	0	0	1	29.126	0	17.138	0	0	0	0	5.1	0	0	0	2.8	0	0	0	0	0	200520000	0	66840000	0	0	57224000	1.90747e+07	3.50412
Q8WUK0;E9PQM0	Phosphatidylglycerophosphatase and protein-tyrosine phosphatase 1	PTPMT1	GOCC:0005739	Mitochondrion	2	5	4	2	1	3	2	3	1	1	2	4	2	1	3	2	3	1	1	2	22.843	0	17.409	25.4	10.9	6.5	20.9	10.9	14.4	6.5	6.5	10.9	996840000	347920000	246430000	5.30397e+08	1124700000	303670000	672000000	7.00123e+08	296890000	245300000	381030000	307740000	2.27505
A0A1B0GVU9;A0A0U1RR66;A0A0U1RQX5;A0A0U1RRC8;A0A1B0GTT3;A0A0U1RQL2;A0A0U1RQX9;A0A0U1RQJ6;A0A0U1RR79;A0A0U1RQQ5;A0A0U1RRJ7	Glutaminyl-tRNA synthetase	QARS1			11	2	0	0	1	0	0	2	2	0	2	0	0	1	0	0	2	2	0	2	83.782	0.00091269	3.4628	13.7	38.9	19.2	14.8	28.9	18.5	18.9	40.6	20.5	0	0	6010000000	2.00333e+09	0	0	11633000000	3.87767e+09	1183800000	0	4298000000	1.82727e+09	2.12211
E7END7;P62820	Ras-related protein Rab-1A	RAB1A	GOCC:0031982	Vesicle	2	3	1	0	0	2	0	1	2	0	0	1	0	0	2	0	1	2	0	0	19.018	0	23.338	16.2	9.2	6.4	23.1	15.6	22.5	32.4	6.4	6.4	175600000	0	0	5.85333e+07	655980000	0	47260000	2.34413e+08	317270000	0	0	1.05757e+08	2.21653
P57735	Ras-related protein Rab-25	RAB25	GOCC:0031982	Vesicle	1	3	0	0	1	0	0	3	0	0	1	0	0	1	0	0	3	0	0	1	23.495	0	5.1895	0	0	5.2	0	0	12.7	0	0	5.2	0	0	197620000	6.58733e+07	0	0	465100000	1.55033e+08	0	0	203860000	6.79533e+07	2.28147
P61020	Ras-related protein Rab-5B	RAB5B	GOCC:0031982	Vesicle	1	2	0	0	0	2	1	0	0	0	0	0	0	0	2	1	0	0	0	0	23.707	0	6.464	9.8	4.7	0	21.9	10.2	0	4.7	4.7	5.1	0	0	0	0	248740000	0	0	8.29133e+07	0	0	0	0	#DIV/0!
Q5HYI8;F8WF50;F8WDC7;C9JXM3;H7C533;F8WAX9	Rab-like protein 3	RABL3			6	4	3	1	3	2	1	3	1	2	1	3	1	3	2	1	3	1	2	1	26.422	0	81.101	18.6	8.9	18.2	13.6	8.9	18.2	8.9	14	8.9	716050000	111470000	594140000	4.73887e+08	941010000	78402000	776090000	5.98501e+08	267100000	150610000	325330000	247680000	2.41643
A8MXE8;A0A1W2PQJ7;Q7Z5J4;J3QLL5	Retinoic acid-induced protein 1	RAI1			4	5	1	0	0	4	0	0	1	0	0	1	0	0	4	0	0	1	0	0	101.43	0	11.809	3	0	0	8.8	0	0	1.7	0	0	59017000	0	0	1.96723e+07	547140000	0	0	182380000	83776000	0	0	2.79253e+07	6.53099
P61224;F5H823;B7ZB78;F5GZG1;E7ESV4;F5H7Y6;A6NIZ1	Ras-related protein Rap-1b	RAP1B	GOCC:0031982	Vesicle	7	1	0	0	0	1	0	0	0	0	0	0	0	0	1	0	0	0	0	0	20.825	0.0098352	1.9516	0	7.6	6	13	7.6	6	7.6	7.6	6	0	0	0	0	93614000	0	0	3.12047e+07	0	0	0	0	#DIV/0!
Q8NBN7	Retinol dehydrogenase 13	RDH13	GOCC:0005739	Mitochondrion	1	3	0	0	0	2	1	0	0	1	0	0	0	0	2	1	0	0	1	0	35.932	0	21.573	0	0	0	10.3	3.9	0	0	3.9	0	0	0	0	0	252040000	0	0	8.40133e+07	0	47256000	0	15752000	5.3335
O94762;J3KTQ2	ATP-dependent DNA helicase Q5	RECQL5	GOCC:1902494,GOCC:0070013,GOCC:1990234	Catalytic complex,Intracellular organelle lumen,Transferase complex	2	3	0	1	1	2	0	1	1	3	1	0	1	1	2	0	1	1	3	1	108.86	0	5.3501	0	1.2	0.7	1.9	0	0.7	0.7	3	0.7	0	70697000	721920000	2.64206e+08	691790000	0	2180500000	957430000	223850000	438490000	542890000	4.01743e+08	2.38319
Q5VTR2;C9J0A5;C9JXC9;C9JWJ4	E3 ubiquitin-protein ligase BRE1A	RNF20	GOCC:1902494,GOCC:0070013,GOCC:1990234	Catalytic complex,Intracellular organelle lumen,Transferase complex	4	8	3	2	1	3	0	0	3	3	1	3	2	1	3	0	0	3	3	1	113.66	0	26.13	5.6	4.4	2.8	5.3	0	1.4	6.1	4.5	1.3	316000000	144170000	74860000	1.78343e+08	1178700000	0	0	392900000	194940000	180440000	126200000	1.67193e+08	2.34997
O15127;H3BV04;H3BN93;H3BUB6;H3BPL9	Secretory carrier-associated membrane protein 2	SCAMP2	GOCC:0031982	Vesicle	5	2	1	0	0	1	0	1	0	0	0	1	0	0	1	0	1	0	0	0	36.648	0	12.558	6.1	0	0	6.1	0	3.6	0	0	0	0	0	0	0	0	0	59781000	19927000	0	0	0	0	#DIV/0!
F8WF48;Q99442;F8WCJ7	Translocation protein SEC62	SEC62			3	3	0	0	1	0	0	3	0	0	1	0	0	1	0	0	3	0	0	1	9.8703	0	5.9308	0	0	14.1	0	0	25.9	0	0	14.1	0	0	37320000	12440000	0	0	410950000	1.36983e+08	0	0	36181000	1.20603e+07	11.3582
H7C561	Splicing factor 1	SF1			1	2	2	0	1	2	1	2	1	1	1	0	0	0	0	0	0	0	0	0	30.159	0	4.9231	18.2	5.2	13.7	18.2	9.6	8.9	9.6	9.6	13.7	341530000	0	195500000	179010000	536200000	59960000	216750000	270970000	105850000	104080000	117010000	108980000	2.48642
A0A0D9SFM0;Q149N8	E3 ubiquitin-protein ligase SHPRH	SHPRH	GOCC:1902494,GOCC:1990234	Catalytic complex,Transferase complex	2	2	0	0	1	1	0	1	1	0	1	0	0	1	1	0	1	1	0	1	193.46	0.0041678	2.3226	0	0	0.7	0.4	0	0.7	0.7	0	0.7	0	0	13018000	4.33933e+06	162150000	0	21893000	6.13477e+07	25724000	0	24652000	16792000	3.65339
G3XAL9;P55011	Solute carrier family 12 member 2	SLC12A2			2	3	3	1	1	1	0	0	0	0	0	3	1	1	1	0	0	0	0	0	124.59	0	13.37	4	2.1	2.1	1.9	0	0	0	0	0	119710000	44788000	26280000	6.35927e+07	67515000	0	0	22505000	0	0	0	0	#DIV/0!
E9PRM7;A0A0J9YWM3;A0A024RCG2;Q96BI1	Solute carrier family 22 member 18	SLC22A18			4	3	1	1	1	2	0	2	1	1	2	1	1	1	2	0	2	1	1	2	34.952	0.00032103	4.3116	3.7	3.7	3.7	7.4	0	5.8	3.7	3.7	7.4	119690000	0	107170000	75620000	284660000	0	123920000	1.36193e+08	0	60288000	121330000	6.05393e+07	2.24967
Q99808	Equilibrative nucleoside transporter 1	SLC29A1			1	2	0	0	0	1	1	0	0	0	0	0	0	0	1	1	0	0	0	0	50.219	0	31.414	0	0	0	5	2.4	0	0	0	0	0	0	0	0	89924000	38436000	0	4.27867e+07	0	0	0	0	#DIV/0!
P19634;B1ALD5	Sodium/hydrogen exchanger 1	SLC9A1	GOCC:0005925	Focal adhesion	2	2	0	0	0	0	2	0	0	0	0	0	0	0	0	2	0	0	0	0	90.762	0	8.9834	0	0	0	0	3.9	0	0	0	0	0	0	0	0	0	101440000	0	3.38133e+07	0	0	0	0	#DIV/0!
G5E975;Q12824;A0A2R8YEE8;A0A0G2JSE9;C9JTA6;A0A2R8Y5N5;A0A0U1RQQ2;A0A0U1RRB8;A0A0G2JRV3;B5MCL5	SWI/SNF-related matrix-associated actin-dependent regulator of chromatin subfamily B member 1	SMARCB1	GOCC:1902494,GOCC:0070013	Catalytic complex,Intracellular organelle lumen	10	4	2	1	0	2	2	1	1	0	1	2	1	0	2	2	1	1	0	1	45.05	0	43.751	9.9	4.1	0	7.4	9.9	3.3	6.6	0	3.3	112810000	56447000	0	56419000	382100000	316250000	121080000	2.73143e+08	121820000	0	178060000	99960000	2.73253
P52788;H7C2R7	Spermine synthase	SMS			2	2	0	2	2	0	0	2	0	0	0	0	2	2	0	0	2	0	0	0	41.268	0.009636	2.0029	0	5.5	5.5	0	0	5.5	0	0	0	0	197190000	298670000	1.65287e+08	0	0	245990000	8.19967e+07	0	0	0	0	#DIV/0!
H0YBT8;H0YAY0;E7EVI4;E7ET87;O75410;A0A0C4DGD3;A0A0C4DGD5;B4E3H6;E5RFM9;R4GMT7	Transforming acidic coiled-coil-containing protein 1	TACC1			10	2	0	0	0	0	0	1	0	0	1	0	0	0	0	0	1	0	0	1	50.447	0.0028193	2.5041	0	0	0	0	0	1.5	0	0	1.5	0	0	0	0	0	0	564850000	1.88283e+08	0	0	29022000	9674000	19.4628
Q6P1X5;H0YEX2	Transcription initiation factor TFIID subunit 2	TAF2	GOCC:1902494,GOCC:0070013,GOCC:1990234	Catalytic complex,Intracellular organelle lumen,Transferase complex	2	2	0	0	0	1	1	0	0	0	0	0	0	0	1	1	0	0	0	0	136.97	0	16.294	0	0	0	1.8	2.3	0	0	0	0	0	0	0	0	77564000	86842000	0	54802000	0	0	0	0	#DIV/0!
Q4KMP7;H3BSE1	TBC1 domain family member 10B	TBC1D10B			2	4	0	1	1	2	1	1	0	3	0	0	1	1	2	1	1	0	3	0	87.198	0	9.5278	0	1.4	2.2	5.6	1.4	2.2	0	6.1	0	0	89448000	170890000	8.67793e+07	749850000	33574000	147870000	3.10431e+08	0	354820000	0	1.18273e+08	2.62469
Q969Z0;C9J7P5;C9IZN7;H7C4R5;C9J5A2;C9J347	FAST kinase domain-containing protein 4	TBRG4	GOCC:0070013,GOCC:0005739,GOCC:0005759	Intracellular organelle lumen,Mitochondrion,Mitochondrial matrix	6	12	3	5	1	6	9	2	6	5	1	3	5	1	6	9	2	6	5	1	70.737	0	43.28	6.7	12	3.5	11.6	19.7	4.6	13	10.6	3.5	3607600000	1476800000	157220000	1.74721e+09	3649500000	3389200000	340660000	2.45979e+09	1653200000	1374700000	283390000	1.10376e+09	2.22855
A0A6Q8PH68;Q9UGU0	Transcription factor 20	TCF20			2	3	3	0	0	2	0	0	1	0	0	3	0	0	2	0	0	1	0	0	135.89	0	20.141	4.4	0	0	2.5	0	0	0.9	0	0	62256000	0	0	20752000	188780000	0	0	6.29267e+07	63802000	0	0	2.12673e+07	2.95884
P21980;A2A299	Protein-glutamine gamma-glutamyltransferase 2	TGM2	GOCC:0005739,GOCC:0031982,GOCC:0005925	Mitochondrion,Vesicle,Focal adhesion	2	3	1	0	0	1	0	0	0	1	0	1	0	0	1	0	0	0	1	0	77.328	0	15.189	2.6	0	0	1.9	0	0	0	1.2	0	71351000	0	0	2.37837e+07	81734000	0	0	2.72447e+07	0	36652000	0	1.22173e+07	2.23
O14925;Q5SRD1	Mitochondrial import inner membrane translocase subunit Tim23	TIMM23	GOCC:0070013	Intracellular organelle lumen	2	3	2	1	2	1	1	2	1	1	2	2	1	2	1	1	2	1	1	2	21.943	0	42.17	12	8.1	12.9	8.1	8.1	12.9	8.1	8.1	12	474540000	172750000	826190000	491160000	488880000	134570000	871000000	498150000	193000000	194900000	356090000	2.47997e+08	2.0087
H0YNT2;A0A0D9SES8;H0YKT5;H0YKN8;H0YL70;Q04726;K7EJR7;H0YNI7;H0YKH0;H0YLW9;H0YLI3;K7EMK7;Q04725;Q04724;Q04727	Transducin-like enhancer protein 3	TLE3			15	2	0	0	0	1	1	0	0	0	0	0	0	0	1	1	0	0	0	0	76.897	0.00033014	4.8067	0	0	0	2.1	1.5	0	0	0	0	0	0	0	0	112100000	50416000	0	54172000	0	0	0	0	#DIV/0!
Q92545;H7BZ05;H7BZV0	Transmembrane protein 131	TMEM131	GOCC:0005739	Mitochondrion	3	4	0	0	0	1	2	0	0	1	0	0	0	0	1	2	0	0	1	0	205.14	0	6.683	0	0	0	1.2	1.8	0	0	1	0	0	0	0	0	133260000	118920000	0	84060000	0	0	0	0	#DIV/0!
H0Y720;Q9UPQ9	Trinucleotide repeat-containing gene 6B protein	TNRC6B			2	5	1	0	0	0	2	0	0	0	3	1	0	0	0	2	0	0	0	3	148.57	0	16.709	0.6	0	0	0	2.2	0	0	0	2.9	12497000	0	0	4.16567e+06	0	228200000	0	7.60667e+07	0	0	94508000	3.15027e+07	2.41461
Q8NFQ8	Torsin-1A-interacting protein 2	TOR1AIP2			1	4	2	2	1	3	2	0	3	1	1	2	2	1	3	2	0	3	1	1	51.263	0	59.413	6.4	7.7	2.3	10	7.7	0	10.9	3.2	3.2	262220000	453240000	42124000	252528000	665060000	361790000	0	3.42283e+08	371520000	49124000	19594000	146746000	2.33249
O94842;A0A669KB71;O94900;O15405	TOX high mobility group box family member 4	TOX4	GOCC:1902494	Catalytic complex	4	5	3	0	1	4	0	0	3	0	0	3	0	1	4	0	0	3	0	0	66.194	0	116.85	9	0	2.1	11.9	0	0	9	0	0	383890000	0	63751000	1.49214e+08	952610000	0	0	3.17537e+08	254600000	0	0	8.48667e+07	3.74159
J3QQJ5;Q9Y2L5;J3QSA1;J3KSL8	Trafficking protein particle complex subunit 8	TRAPPC8			4	2	0	0	0	1	1	0	0	0	0	0	0	0	1	1	0	0	0	0	154.98	0.006799	2.1521	0	0	0	1.2	1.6	0	0	0	0	0	0	0	0	27963000	141040000	0	5.63343e+07	0	0	0	0	#DIV/0!
Q05GC8;Q96PN7	Breast cancer anti-estrogen resistance 2	TRERF1	GOCC:0070013	Intracellular organelle lumen	2	4	1	0	0	2	1	1	0	1	0	1	0	0	2	1	1	0	1	0	134.31	0	18.873	1.1	0	0	3.8	1.4	1.6	0	1.6	0	46580000	0	0	1.55267e+07	272620000	101100000	197470000	1.90397e+08	0	182520000	0	60840000	3.12947
P22314;Q5JRR6	Ubiquitin-like modifier-activating enzyme 1	UBA1	GOCC:1902494,GOCC:0005739	Catalytic complex,Mitochondrion	2	5	1	1	1	3	2	3	0	1	1	1	1	1	3	2	3	0	1	1	117.85	0	34.242	1.4	1.7	1.7	4.8	3.1	4.3	0	1.7	1.7	67034000	168980000	37610000	91208000	248920000	194960000	234030000	225970000	0	131040000	43805000	5.82817e+07	3.87721
H0YA18;D6RGX2;Q9NUQ7;H0Y9B0	Ufm1-specific protease 2	UFSP2			4	2	0	0	0	0	1	1	0	0	0	0	0	0	0	1	1	0	0	0	41.804	0.00062286	3.7949	0	0	0	0	5.7	5.4	0	0	0	0	0	0	0	0	82139000	73506000	5.18817e+07	0	0	0	0	#DIV/0!
P61758	Prefoldin subunit 3	VBP1			1	2	0	0	1	0	1	2	0	0	1	0	0	1	0	1	2	0	0	1	22.626	0.0030882	2.4533	0	0	4.1	0	4.1	9.1	0	0	4.1	0	0	33618000	11206000	0	0	113910000	37970000	0	0	56042000	1.86807e+07	2.03258
Q96RL7	Vacuolar protein sorting-associated protein 13A	VPS13A	GOCC:0070013,GOCC:0005739,GOCC:0031982	Intracellular organelle lumen,Mitochondrion,Vesicle	1	4	1	0	1	1	1	1	1	0	1	1	0	1	1	1	1	1	0	1	360.27	0	8.2004	0.5	0	0.5	0.6	0.4	0.5	0.4	0	0.5	164190000	0	0	54730000	264800000	56889000	76355000	1.32681e+08	25929000	0	93036000	39655000	3.34589
Q4G0F5	Vacuolar protein sorting-associated protein 26B	VPS26B	GOCC:0031982	Vesicle	1	1	0	0	0	0	0	1	0	0	0	0	0	0	0	0	1	0	0	0	39.154	0	7.2131	0	0	0	0	0	3.6	0	0	0	0	0	0	0	0	0	43450000	1.44833e+07	0	0	0	0	#DIV/0!
E9PQR7;Q9UK41	Vacuolar protein sorting-associated protein 28 homolog	VPS28	GOCC:0031982	Vesicle	2	2	0	0	0	0	1	0	0	1	0	0	0	0	0	1	0	0	1	0	18.469	0.0057724	2.2386	0	0	0	0	11.2	0	0	9.3	0	0	0	0	0	0	50847000	0	16949000	0	0	0	0	#DIV/0!
O00308	NEDD4-like E3 ubiquitin-protein ligase WWP2	WWP2	GOCC:1902494,GOCC:1990234	Catalytic complex,Transferase complex	1	2	0	0	0	0	0	1	0	0	1	0	0	0	0	0	1	0	0	1	98.911	0.0022831	2.6297	0	0	0	0	0	3.1	0	0	2.6	0	0	0	0	0	0	331260000	110420000	0	0	13683000	4561000	24.2096
A6NGW1;O95070;E9PS11;E9PIZ0;C9JST7	Protein YIF1A	YIF1A			5	2	1	0	1	2	1	2	1	0	1	1	0	1	2	1	2	1	0	1	26.377	0.00032436	4.5204	5	0	5	11.2	5	11.2	5	0	5	176340000	0	172780000	1.16373e+08	297880000	27579000	510940000	2.788e+08	104110000	0	74397000	5.95023e+07	4.68552
P49750;H0YIQ2;F8VU51;H0YI23	YLP motif-containing protein 1	YLPM1	GOCC:0070013	Intracellular organelle lumen	4	21	10	2	5	15	3	1	11	2	1	10	2	5	15	3	1	11	2	1	241.64	0	307.72	8.3	1.1	3.7	11.2	2.7	0.9	7	1.1	0.9	2763500000	43682000	325290000	1.04416e+09	5372700000	131470000	59354000	1854508000	1987000000	73718000	162700000	7.41139e+08	2.50224
O75844;A0A6Q8PHG9	CAAX prenyl protease 1 homolog	ZMPSTE24			2	2	1	0	0	2	0	1	0	0	0	1	0	0	2	0	1	0	0	0	54.812	0.00033091	4.8396	2.7	0	0	4.4	0	2.7	0	0	0	0	0	0	0	61726000	0	15471000	2.57323e+07	0	0	0	0	#DIV/0!
H3BLX4;Q96JM2	Zinc finger protein 462	ZNF462			2	2	1	0	0	1	0	0	0	0	0	1	0	0	1	0	0	0	0	0	165.69	0	11.016	1.3	0	0	1.8	0	0	0	0	0	0	0	0	0	203810000	0	0	6.79367e+07	0	0	0	0	#DIV/0!
A0A0C4DFM2;Q6ZN55	Zinc finger protein 574	ZNF574			2	5	2	1	0	3	1	0	1	0	0	2	1	0	3	1	0	1	0	0	108.7	0	11.365	2.5	1	0	3.3	1.5	0	1	0	0	103630000	30095000	0	44575000	207030000	17594000	0	7.48747e+07	107210000	0	0	3.57367e+07	2.09518
P-cadherin-TurboID and E-cadherin-TurboID shared proteins
P78363;A0A3B3IRV8;F6TT59	Retinal-specific phospholipid-transporting ATPase ABCA4	ABCA4			3	2	2	0	0	1	0	0	0	0	0	2	0	0	1	0	0	0	0	0	255.94	0.0036202	2.3506	0.8	0	0	0.3	0	0	0	0	0	224740000	0	0	7.49133e+07	353990000	0	0	1.17997e+08	0	0	0	0	#DIV/0!
Q9NRK6	ATP-binding cassette sub-family B member 10, mitochondrial	ABCB10			1	3	2	1	0	1	0	1	0	2	0	2	1	0	1	0	1	0	2	0	79.147	0	6.9985	3.8	1.6	0	1.6	0	2.2	0	2.8	0	128270000	38930000	0	5.57333e+07	60430000	0	86731000	4.90537e+07	0	43702000	0	1.45673e+07	3.36737
Q13085;Q59FY4;A0A0C4DGT1;S4R3S7;F8W8T8;H0YGH5;A0A087WWN5;A0A087X2F8;A0A087X126;A0A087WYS8;A0A087WYK6	Acetyl-CoA carboxylase 1	ACACA			11	107	26	31	80	26	29	95	21	36	62	23	28	69	23	26	80	19	33	52	265.55	0	323.31	14.4	18.2	37.6	13.9	15.5	43.6	13.1	21.7	31.3	6120100000	6292600000	85161000000	3.25246e+10	7314500000	3821800000	146130000000	52422100000	3785200000	9201300000	32276000000	15087500000	3.47454
F8W1I9;Q6JQN1	Acyl-CoA dehydrogenase family member 10	ACAD10			2	2	1	2	1	1	1	1	1	1	1	1	2	1	1	1	1	1	1	1	80.464	0	21.173	2.3	3.8	2.3	2.3	2.3	2.3	1.5	1.5	2.3	139660000	367900000	70100000	1.92553e+08	205490000	287170000	286840000	2.59833e+08	34113000	82273000	155690000	90692000	2.86501
Q9NPJ3	Acyl-coenzyme A thioesterase 13	ACOT13			1	2	1	1	1	1	0	1	0	0	0	1	1	1	1	0	1	0	0	0	14.96	0	5.9156	8.6	8.6	8.6	12.9	0	8.6	0	0	0	417260000	255280000	224840000	2.99127e+08	178810000	0	188000000	122270000	0	0	0	0	#DIV/0!
H7C5A7;O14734;A0A494C0N6;E9PJN0;H0Y698;Q9BR14;E9PMC4;E9PIS4;E9PRD4	Acyl-coenzyme A thioesterase 8	ACOT8			9	3	2	2	0	2	1	1	2	1	1	2	2	0	2	1	1	2	1	1	23.333	0	12.847	18.7	15.3	0	18.7	7.7	7.7	15.3	7.7	7.7	1549100000	160060000	0	569720000	1498200000	72677000	62099000	5.44325e+08	161620000	108560000	45698000	1.05293e+08	5.16964
Q15067;K7ENF1;K7ESC7;I3L2U4;K7ELT1;I3L0T4	Peroxisomal acyl-coenzyme A oxidase 1	ACOX1			6	9	1	5	0	3	2	1	0	2	0	1	5	0	3	2	1	0	2	0	74.423	0	46.502	3.9	11.7	0	10.6	4.5	2.3	0	5.3	0	92648000	636780000	0	2.43143e+08	775470000	58721000	146080000	326757000	0	209500000	0	6.98333e+07	4.6791
A8MQ02;J3KN01;P55196;Q5TIG5;H0Y7R8;H0Y8L4;H0Y948;H0Y8U8;H0Y9I0;F8W9I4;E9PFY5;H0YA98	Afadin	AFDN	GOCC:0005912,GOCC:0044291	Adherens junction,Cell-cell contact zone	12	40	16	15	33	13	11	21	11	15	6	16	15	33	13	11	21	11	15	6	201.8	0	281.55	11.5	10.5	25.6	10	9.7	16.8	8.6	12	4.7	4599100000	1796500000	13170000000	6.52187e+09	3858300000	1072800000	4866500000	3.26587e+09	1298000000	1660200000	683340000	1.21385e+09	2.69051
O15120	1-acyl-sn-glycerol-3-phosphate acyltransferase beta	AGPAT2			1	2	0	1	1	1	0	1	0	1	0	0	1	1	1	0	1	0	1	0	30.914	0.00063613	4.1345	0	2.9	5	5	0	5	0	2.9	0	0	97185000	102970000	6.67183e+07	105410000	0	87017000	6.41423e+07	0	60862000	0	2.02873e+07	3.16169
Q5TGY3	AT-hook DNA-binding motif-containing protein 1	AHDC1			1	6	3	0	0	4	1	0	1	0	1	3	0	0	4	1	0	1	0	1	168.35	0	52.097	3.6	0	0	4.7	0.7	0	0.7	0	1.3	207980000	0	0	6.93267e+07	375060000	113660000	0	1.62907e+08	42594000	0	44953000	2.91823e+07	5.58237
A0A7P0T893;O43823;M0QX51;A0A7P0TBC8	A-kinase anchor protein 8	AKAP8			4	9	4	1	4	5	0	4	6	1	2	4	1	4	5	0	4	6	1	2	74.846	0	126.52	13.8	2.9	13.8	15.5	0	10.2	16.1	1.2	7.8	1198800000	5641100	940780000	715073700	2059300000	0	669830000	909710000	493860000	30571000	454020000	3.2615e+08	2.78924
F8VP50;P05091	Aldehyde dehydrogenase, mitochondrial	ALDH2			2	2	1	0	0	1	0	0	0	0	0	1	0	0	1	0	0	0	0	0	28.372	0	6.0634	6.5	0	0	5.4	0	0	0	0	0	113320000	0	0	3.77733e+07	64167000	0	0	21389000	0	0	0	0	#DIV/0!
P30038;Q5TF55	Delta-1-pyrroline-5-carboxylate dehydrogenase, mitochondrial	ALDH4A1			2	3	1	0	0	2	1	0	1	0	0	1	0	0	2	1	0	1	0	0	61.719	0	19.582	2.7	0	0	6.4	2.1	0	2.1	0	0	158240000	0	0	5.27467e+07	375460000	49214000	0	141558000	44803000	0	0	1.49343e+07	9.4787
Q9BV10;H7C4I6;H7C5R7	Dol-P-Man:Man(7)GlcNAc(2)-PP-Dol alpha-1,6-mannosyltransferase	ALG12			3	2	1	1	1	2	0	0	0	1	0	1	1	1	2	0	0	0	1	0	54.654	0.0006402	4.2457	2	2	2	3.9	0	0	0	2	0	76224000	77310000	52545000	68693000	64807000	0	0	2.16023e+07	0	0	0	0	#DIV/0!
Q9H553	Alpha-1,3/1,6-mannosyltransferase ALG2	ALG2			1	3	0	0	1	3	0	2	0	0	0	0	0	1	3	0	2	0	0	0	47.091	0.0012096	3.379	0	0	1.9	8.4	0	4.8	0	0	0	0	0	44274000	14758000	308840000	0	145060000	151300000	0	0	0	0	#DIV/0!
Q12955;A0A087WTF3;A0A087WZ65;H0Y3A4;A0A087WWI5;H0YA66;H0YAH5;A0A087WTE8;A0A087WVC2;B1AQT1;H0Y9E9;A0A087WZ26;D6RHY3;A0A087X0B4	Ankyrin-3	ANK3	GOCC:0016328,GOCC:0044291	Lateral plasma membrane,Cell-cell contact zone	14	11	0	0	11	0	0	1	0	0	0	0	0	10	0	0	1	0	0	0	480.4	0	38.09	0	0	3	0	0	0.3	0	0	0	0	0	1829700000	609900000	0	0	110490000	36830000	0	0	0	0	#DIV/0!
H0YM23;O75179;H0YLQ3	Ankyrin repeat domain-containing protein 17	ANKRD17			3	2	1	1	0	1	0	0	0	0	0	1	1	0	1	0	0	0	0	0	263.25	0	7.5434	3.1	1	0.7	0.4	1.1	0	0.8	1.8	2	133520000	30665000	0	5.47283e+07	28819000	0	0	9.60633e+06	0	0	0	0	#DIV/0!
O43299;A0A3B3IRY2;A0A3B3ITJ1;A0A3B3IS81;A0A3B3ISJ0	AP-5 complex subunit zeta-1	AP5Z1			5	2	1	2	1	0	1	0	0	1	1	1	2	1	0	1	0	0	1	1	88.604	0	6.4921	1.1	2.9	1.7	0	1.1	0	0	1.7	1.7	24707000	108860000	44284000	5.92837e+07	0	17444000	0	5.81467e+06	0	0	0	0	#DIV/0!
P25054;A0A2Q2SV78;E9PFT7;D6RFL6;R4GMU6;E7EMH9	Adenomatous polyposis coli protein	APC	GOCC:0043296,GOCC:0016342,GOCC:0016328	Apical junction complex,Catenin complex,Lateral plasma membrane	6	5	0	0	4	1	0	1	0	0	0	0	0	4	1	0	1	0	0	0	311.64	0	13.433	0	0	2.1	0.8	0	0.6	0	0	0	0	0	192740000	6.42467e+07	69794000	0	0	2.32647e+07	0	0	0	0	#DIV/0!
H7C393;C9JIF9;P13798;C9JLK2;H7C1U0;F8WEH5	Acyl-peptide hydrolase	APEH			6	3	3	0	0	3	0	0	1	0	0	3	0	0	3	0	0	1	0	0	31.904	0	9.5185	13	0	0	13	0	0	5.3	0	0	438320000	0	0	1.46107e+08	385120000	0	0	1.28373e+08	93488000	0	0	3.11627e+07	4.11946
P62330	ADP-ribosylation factor 6	ARF6			1	4	1	1	3	2	1	0	0	1	0	1	1	3	2	1	0	0	1	0	20.082	0	6.9317	6.3	4.6	17.1	18.3	4.6	0	0	6.3	0	0	123530000	167040000	9.68567e+07	173610000	88735000	0	8.74483e+07	0	53708000	0	1.79027e+07	4.88465
A0A5F9ZH78;P05089	Arginase-1	ARG1			2	2	0	0	2	0	0	2	0	0	0	0	0	2	0	0	2	0	0	0	25.66	0.0012066	3.3546	0	0	7.6	0	0	7.6	0	0	0	0	0	672250000	2.24083e+08	0	0	1295900000	4.31967e+08	0	0	0	0	#DIV/0!
Q9NWB6	Arginine and glutamate-rich protein 1	ARGLU1			1	14	0	1	7	0	0	13	0	0	3	0	1	7	0	0	13	0	0	3	33.216	0	56.729	0	2.9	20.5	0	0	34.4	0	0	11.7	0	85919000	3093300000	1.05974e+09	0	0	7733900000	2.57797e+09	0	0	534770000	1.78257e+08	14.4621
Q1RLN5;Q8IWW6;H0Y5D8	ARHGAP12 protein; Rho GTPase-activating protein 12	ARHGAP12			3	2	1	1	0	1	0	0	0	0	0	1	1	0	1	0	0	0	0	0	90.873	0	6.1511	1.1	1.9	0	1.1	0	0	0	0	0	92435000	61208000	0	5.12143e+07	69321000	0	0	23107000	0	0	0	0	#DIV/0!
A0A7P0TAS2;Q5T5U3;A0A087WW76;A0A452Q6Z5;A0A1B0GV73;E7ESW5;A0A1B0GTZ9;Q5JSD8;H0Y5T2;H0Y468	Rho GTPase-activating protein 21	ARHGAP21			10	18	1	1	16	1	0	12	0	0	1	1	1	16	1	0	12	0	0	1	218.52	0	171.45	0.9	0.7	13.7	0.5	0	9	0	0	0.7	51740000	166210000	2629200000	949050000	27257000	0	957120000	3.28126e+08	0	0	38380000	1.27933e+07	25.6482
Q8N2F6;A0A0J9YWR7;H7C2M7;A0A0J9YXE4;H7BXQ8;C9J5N7;A0A0J9YY38;A0A0J9YXV5	Armadillo repeat-containing protein 10	ARMC10			8	4	0	0	1	1	0	2	1	0	0	0	0	1	1	0	2	1	0	0	37.54	0.00032331	4.4804	0	0	3.8	3.2	0	5.8	5	0	0	0	0	410030000	1.36677e+08	20965000	0	824600000	281855000	75650000	0	0	2.52167e+07	11.1773
A0A5F9ZHM8;F8W943;P04424;A0A5F9ZI35;A0A5F9ZHC6	Argininosuccinate lyase	ASL			5	2	0	0	1	0	0	1	0	0	0	0	0	0	0	0	1	0	0	0	38.707	0	5.4565	0	0	2.6	0	0	4	0	0	0	0	0	130610000	4.35367e+07	0	0	22665000	7555000	0	0	0	0	#DIV/0!
H7C152;Q7Z3C6;H7C1G6	Autophagy-related protein 9A	ATG9A			3	2	1	0	0	1	1	1	0	0	0	1	0	0	1	1	1	0	0	0	26.865	0.001198	3.2806	5.5	0	0	5.5	9.8	5.5	0	0	0	293630000	0	0	9.78767e+07	124560000	0	27464000	5.06747e+07	0	0	0	0	#DIV/0!
A0A2R8YDN7;A0A2R8Y635;Q9H7F0;H7C1U7	Cation-transporting ATPase	ATP13A3			4	3	2	0	1	2	0	1	0	0	1	2	0	1	2	0	1	0	0	1	138.82	0	5.3325	2.7	0	1	1.8	0	1	0	0	1	182610000	0	120200000	1.00937e+08	177390000	0	84717000	87369000	0	0	86515000	2.88383e+07	3.02961
P23634	Plasma membrane calcium-transporting ATPase 4	ATP2B4			1	4	0	0	1	1	2	2	0	0	0	0	0	1	1	2	2	0	0	0	137.92	0	16.017	5.6	3.2	6.2	7	6.7	6.4	2.4	3.2	4.6	0	0	59107000	1.97023e+07	50788000	124380000	200650000	1.25273e+08	0	0	0	0	#DIV/0!
A0A1B0GVC7;A0A1B0GU12;B7Z413;A0A1B0GTU8;A0A1B0GVB9;A0A1B0GVW0;A0A1C7CYW4;O75787;A0A1B0GWD6;A0A1B0GVI9;A0A1B0GWJ8;H7C3E1;B7Z1I9;A0A1B0GTB0;A0A1B0GUT7;A0A1B0GUV3;A0A1B0GVZ1;H7C240;A0A1B0GW13;A0A1B0GV60	ATPase H(+)-transporting lysosomal accessory protein 2	ATP6AP2			20	3	2	0	0	2	0	0	1	0	0	2	0	0	2	0	0	1	0	0	27.54	0	29.774	11.2	0	0	11.2	0	0	8.3	0	0	294370000	0	0	9.81233e+07	451780000	0	0	1.50593e+08	128750000	0	0	4.29167e+07	3.50897
Q9NQS1;H0YKR0	Cell death regulator Aven	AVEN			2	2	1	1	0	1	0	0	0	0	0	1	1	0	1	0	0	0	0	0	38.506	0.00062093	3.7726	2.8	6.1	0	2.8	0	0	0	0	0	83122000	99527000	0	60883000	70166000	0	0	2.33887e+07	0	0	0	0	#DIV/0!
Q9NRL2;A0A087WWN7	Bromodomain adjacent to zinc finger domain protein 1A	BAZ1A			2	7	4	1	0	3	2	1	1	1	0	4	1	0	3	2	1	1	1	0	178.7	0	40.778	3.3	1.5	0	2.5	2.2	0.5	1.5	1.5	0	3545300000	158170000	0	1234490000	41636000000	76696000	13522000000	1.84116e+10	239000000	176400000	0	1.38467e+08	132.967
A0A087WZX0;Q86UU0	B-cell CLL/lymphoma 9-like protein	BCL9L			2	2	1	0	0	2	0	0	0	1	0	1	0	0	2	0	0	0	1	0	153.09	0	9.4785	1.1	0	0	2.1	0	0	0	1	0	158300000	0	0	5.27667e+07	210390000	0	0	70130000	0	0	0	0	#DIV/0!
Q13895;H7BY94	Bystin	BYSL			2	2	0	1	0	0	1	1	0	0	0	0	1	0	0	1	1	0	0	0	49.601	0	5.017	0	2.1	0	0	2.1	4.1	0	0	0	0	62384000	0	2.07947e+07	0	66241000	61190000	42477000	0	0	0	0	#DIV/0!
A1L170;F8W6W0	Uncharacterized protein C1orf226	C1orf226			2	4	1	1	3	0	2	2	0	1	1	1	0	3	0	1	2	0	1	1	29.057	0	95.942	6.2	12.9	20.6	0	19.1	12.5	0	6.2	6.2	173180000	114150000	1038300000	4.41877e+08	0	229000000	362730000	1.97243e+08	0	128130000	163520000	9.72167e+07	2.0289
Q5T0Z8	Uncharacterized protein C6orf132	C6orf132			1	8	2	1	1	2	2	1	0	1	0	2	1	1	2	2	1	0	1	0	124.03	0	12.064	2.1	1.8	1.2	2.6	4.4	0.6	0	1	0	264060000	64211000	117610000	148627000	342880000	182110000	356330000	2.93773e+08	0	56493000	0	18831000	15.6005
Q08AD1	Calmodulin-regulated spectrin-associated protein 2	CAMSAP2			1	2	0	2	0	0	1	0	0	0	0	0	2	0	0	1	0	0	0	0	168.09	0.0052501	2.2739	0	1.9	0	0	0.9	0	0	0	0	0	67621000	0	2.25403e+07	0	24185000	0	8.06167e+06	0	0	0	0	#DIV/0!
A0A2U3TZN6;A0A2U3TZM4;A0A2U3TZM1;A0A2R8YE77;A0A2R8YEK3;O14936;A0A2R8Y6F8;A0A7I2RJN6;A0A2R8YFN5;Q5JS79;A0A2R8YEJ7;A0A2R8Y3B3;A0A2R8Y6D8;Q5JS72;A0A2R8YGH2;A0A2R8Y4K4	Peripheral plasma membrane protein CASK	CASK	GOCC:0005604	Basement membrane	16	6	2	2	2	2	3	2	0	2	1	2	2	2	2	3	2	0	2	1	100.2	0	11.717	2.4	3.9	2.4	2.4	3.5	2	0	2.2	0.8	179540000	272200000	312960000	254900000	214030000	237780000	88641000	1.8015e+08	0	110700000	67722000	59474000	3.02906
P30260;G5EA36;I3L394;F6QPS0;I3L2Z8;I3L328;I3L3H6	Cell division cycle protein 27 homolog	CDC27			7	9	5	2	0	6	2	1	1	2	3	5	2	0	6	2	1	1	2	3	91.866	0	46.775	7.9	3.2	0	11.4	3.6	1.8	1.8	3.6	4.4	1494100000	125560000	0	5.39887e+08	1408100000	202850000	91545000	5.67498e+08	228190000	281840000	218130000	242720000	2.33808
Q6DT37;H0YLY0	Serine/threonine-protein kinase MRCK gamma	CDC42BPG			2	7	2	3	2	2	0	0	0	3	0	2	2	2	2	0	0	0	3	0	172.46	0	8.8872	2.3	2.3	1.8	1.7	0	0	0	2.5	0	778490000	185560000	959630000	6.41227e+08	826260000	0	0	275420000	0	197370000	0	65790000	4.18635
P12830;H3BNC6;H3BVI7;J3QKP1	Cadherin-1	CDH1	GOCC:0043296,GOCC:0005912,GOCC:0016342,GOCC:0016328	Apical junction complex,Adherens junction,Catenin complex,Lateral plasma membrane	4	17	11	11	15	0	0	1	0	0	0	10	11	14	0	0	0	0	0	0	97.455	0	271.25	16.2	17.2	17.8	0	0	0.8	0	0	0	9588900000	6301500000	90391000000	3.54271e+10	0	0	190020000	63340000	0	0	0	0	#DIV/0!
Q00535	Cyclin-dependent-like kinase 5	CDK5			1	3	1	2	0	1	1	0	0	1	0	1	2	0	1	1	0	0	1	0	33.304	0	5.1325	8.9	9.6	2.7	8.9	5.5	2.7	0	5.5	2.7	29644000	115340000	0	48328000	70275000	40391000	0	3.68887e+07	0	37612000	0	1.25373e+07	2.94231
F8WCI3;A0A0A0MRG9;Q96SN8;F8WBJ0;F8WF55;B1AMJ5	CDK5 regulatory subunit-associated protein 2	CDK5RAP2			6	3	2	0	1	3	0	0	0	0	0	2	0	1	3	0	0	0	0	0	86.512	0	6.9502	2.4	0	1.2	4.4	0	0	0	0	0	193100000	0	30025000	74375000	143880000	0	0	47960000	0	0	0	0	#DIV/0!
Q03701;C9J9W7	CCAAT/enhancer-binding protein zeta	CEBPZ			2	7	0	0	5	0	0	3	0	0	5	0	0	5	0	0	3	0	0	5	120.97	0	24.627	0	0	5.9	0	0	3.1	0	0	5.4	0	0	1629300000	543100000	0	0	1622600000	5.40867e+08	0	0	327820000	1.09273e+08	4.94967
A0A2R8Y4C1;A8MST6;A0A2R8Y5W6;A0A2R8YCP0;A0A2R8Y7A4;A0A2R8Y589;A0A2R8Y7U5;A0A2U3TZI9;A0A2R8Y432;Q5JTW2	Centrosomal protein of 78 kDa	CEP78			10	2	1	1	0	1	1	1	0	0	0	1	1	0	1	1	1	0	0	0	75.884	0.0052515	2.2745	1.5	1.9	0	1.5	1.5	1.5	0	0	0	116360000	14374000	0	43578000	78722000	49472000	40535000	56243000	0	0	0	0	#DIV/0!
Q9UFW8;C9JUJ0	CGG triplet repeat-binding protein 1	CGGBP1			2	2	1	2	0	1	0	0	0	0	0	1	2	0	1	0	0	0	0	0	18.82	0.0028129	2.4779	5.4	12	0	5.4	0	0	0	0	0	166180000	115180000	0	9.37867e+07	143930000	0	0	4.79767e+07	0	0	0	0	#DIV/0!
Q13111;K7EJF1;K7EPA1	Chromatin assembly factor 1 subunit A	CHAF1A			3	4	0	1	0	1	2	0	0	0	0	0	1	0	1	2	0	0	0	0	106.91	0	8.2378	0	2.7	0	1	5	0	0	0	0	0	145220000	0	4.84067e+07	105220000	111820000	0	7.23467e+07	0	0	0	0	#DIV/0!
Q9P2D1;H3BTW3;Q3L8U1;A0A087WU44	Chromodomain-helicase-DNA-binding protein 7	CHD7			4	2	2	0	0	2	0	0	0	0	0	2	0	0	2	0	0	0	0	0	335.92	0.00064	4.2452	0.8	0	0	0.8	0.3	0	0	0	0	245750000	0	0	8.19167e+07	257990000	0	0	8.59967e+07	0	0	0	0	#DIV/0!
A0A2R8Y840;Q9HCK8;A0A2R8YFT4;A0A2R8Y808;A0A2R8Y4P3;H0YJG4;A0A2R8YFI9	Chromodomain-helicase-DNA-binding protein 8	CHD8			7	4	2	1	1	2	1	0	1	1	1	2	1	1	2	0	0	1	1	1	225.91	0	13.739	1.9	0.6	0.8	1.9	0.5	0	0.6	0.6	0.8	288120000	154130000	71270000	1.71173e+08	311260000	33167000	0	114809000	0	77609000	69177000	4.89287e+07	2.34646
Q96JQ2;G3V3D8	Calmin	CLMN			2	6	0	0	3	0	1	2	0	1	1	0	0	3	0	1	2	0	1	1	111.65	0	10.176	0	0	4.3	0	0.8	2.6	0	1.3	0.9	0	0	384600000	128200000	0	23636000	193870000	72502000	0	71889000	29139000	33676000	2.15293
A0A3B3ISV3;P02462;P29400	Collagen alpha-1(IV) chain	COL4A1	GOCC:0005604	Basement membrane	3	2	2	0	0	2	1	0	1	1	0	2	0	0	2	1	0	1	1	0	39.731	0	38.961	7.5	0	0	7.5	3.9	0	3.9	3.9	0	407230000	0	0	1.35743e+08	380920000	0	0	1.26973e+08	79271000	54064000	0	44445000	2.85686
H7BXT2;Q9BSW2;H0YFI5	EF-hand calcium-binding domain-containing protein 4B	CRACR2A			3	2	0	0	1	0	1	1	0	0	0	0	0	1	0	1	1	0	0	0	23.29	0.0033529	2.3995	0	0	4	0	3.5	3.5	0	0	0	0	0	42753000	14251000	0	0	100080000	33360000	0	0	0	0	#DIV/0!
A0A7I2V425;A0A7I2V2I3;A0A7I2V5A7;A0A7I2V5G7;A0A7I2V3F0;A0A7I2V3M9;A0A6Q8PGS3;A0A6Q8PHN8;A0A7I2V4L2;A0A6Q8PF96;A0A6Q8PF61;A0A7I2V5W3;E5RGA5;E5RI67;A0A7I2V4U4;A0A7I2YQE8;A0A7I2V3W2;A0A7I2V3F6;A0A7I2V5J7;F2Z2M5;A0A7I2V571;A0A7I2V3G6;A0A7I2YQX1;A0A7I2V2P7;A0A7I2V3Q0;A0A7I2V450;A0A7I2V5P5;A0A7I2V5J9;A0A7I2V398;A0A7I2YQH9;A0A7I2V3Z9;A0A7I2V5L8;A0A7I2V5N5;A0A7I2V372;A0A7I2PHE7;A0A7I2V4R5;A0A7I2V3V5;Q1MS…	Centrosome and spindle pole-associated protein 1	CSPP1			38	2	2	0	0	2	0	0	0	0	0	2	0	0	2	0	0	0	0	0	38.138	0	7.9189	10	0	0	10	0	0	0	0	0	254450000	0	0	8.48167e+07	203760000	0	0	67920000	0	0	0	0	#DIV/0!
P04080;A0A1W2PS52	Cystatin-B	CSTB			2	2	0	1	0	0	0	1	0	0	0	0	1	0	0	0	1	0	0	0	11.139	0.0022689	2.5807	0	12.2	0	0	0	12.2	0	0	0	0	62367000	0	20789000	0	0	121870000	4.06233e+07	0	0	0	0	#DIV/0!
P35221;G3XAM7;E5RIB1;E5RJ41;E5RG03;E5RGY6;E5RHV7;E5RGY7;E5RIE0;E5RJL0;E5RGD2;E5RFM3;E5RJP7;E5RFM5;E5RFG3;E5RFK9;H0YBB8;A0A087WZL6;E5RGU3;E5RHJ5;E5RJZ2;E5RIT8;B9A010;E5RGG4;E5RJ43;E5RGS1;REV__Q9P2T0;Q9UI47	Catenin alpha-1	CTNNA1	GOCC:0005912,GOCC:0016342	Adherens junction,Catenin complex	28	92	56	60	82	49	42	75	0	0	0	46	51	65	40	34	59	0	0	0	100.07	0	323.31	66.1	77.4	81.1	61.9	54.1	79.8	0	0	0	111720000000	75383000000	628490000000	2.71864e+11	68414000000	16246000000	269190000000	117950000000	0	0	0	0	#DIV/0!
P26232;A0A0A0MRI5;A0A0A0MTJ6;C9J144;C9IZ88	Catenin alpha-2	CTNNA2	GOCC:0005912,GOCC:0016342	Adherens junction,Catenin complex	5	2	1	1	2	1	1	2	0	0	0	1	1	2	1	1	2	0	0	0	105.31	0	27.078	11.1	11.3	17.8	10.8	10.6	17	0	0	0	8185100000	1415300000	20084000000	9894800000	4529300000	838880000	10526000000	5298060000	0	0	0	0	#DIV/0!
A0A2R8YCH5;A0A2R8Y5A3;P35222;A0A2R8Y804;A0A2R8Y543;B4DGU4;A0A2R8Y7Z0;A0A2R8Y750;A0A2R8Y5C3;A0A2R8Y5Z1;A0A2R8Y6G0;A0A2R8Y815;A0A2R8YG06;C9IZ65	Catenin beta-1	CTNNB1	GOCC:0005912,GOCC:0016342,GOCC:0016328,GOCC:0044291	Adherens junction,Catenin complex,Lateral plasma membrane,Cell-cell contact zone	14	32	18	21	28	11	9	22	0	0	0	18	21	28	11	9	22	0	0	0	85.267	0	323.31	29.9	43	48.8	22.2	17.8	42.9	2.3	2.3	2.3	13147000000	14325000000	99629000000	42367000000	4884900000	934850000	18214000000	8011250000	0	0	0	0	#DIV/0!
A0A669KB05;A0A669KB62	Catenin delta-1	CTNND1	GOCC:0043296,GOCC:0005912,GOCC:0016342,GOCC:0005915	Apical junction complex,Adherens junction,Catenin complex,Zonula adherens	2	70	45	50	50	41	41	44	26	33	20	2	1	2	2	0	1	0	1	0	102.29	0	323.31	50.2	59.7	53.9	49.4	45.6	51.8	36.7	47	27.3	46486000000	36533000000	77511000000	53510000000	40344000000	17849000000	31460000000	2.98843e+10	9699800000	13478000000	4200600000	9.12613e+09	3.27459
A0A590UJ21;A0A0C4DGX4;A0A590UJ50;Q13616;A0A590UJ56;A0A590UK34;A0A590UJR3;A0A590UJC4;A0A590UJA0	Cullin-1	CUL1			9	5	0	2	1	1	2	2	0	1	0	0	2	1	1	2	2	0	1	0	84.333	0	17.082	0	4.2	2.5	2.2	4.2	3.6	0	2.2	0	0	144090000	0	48030000	62838000	117150000	142840000	1.07609e+08	0	56884000	0	1.89613e+07	5.6752
J3KRZ4;J3KS22;Q7Z4W1;J3QS45;J3KSZ5;J3QL34;J3QS36	L-xylulose reductase	DCXR			7	2	0	0	1	1	0	1	0	0	1	0	0	1	1	0	1	0	0	1	14.892	0	7.2978	0	0	5.7	8.5	0	8.5	0	0	8.5	0	0	33563000	1.11877e+07	0	0	44465000	1.48217e+07	0	0	15816000	5272000	2.81139
Q9NUL7	Probable ATP-dependent RNA helicase DDX28	DDX28			1	9	7	1	1	6	2	3	1	2	2	7	1	1	6	2	3	1	2	2	59.58	0	57.657	20.2	3	3	17	8.1	10.2	3	7.4	5.6	2054300000	137360000	153960000	7.81873e+08	1462800000	215950000	192270000	6.23673e+08	151440000	301530000	473060000	3.08677e+08	2.02047
F5H5U2;Q8NHQ9;E7EX41	ATP-dependent RNA helicase DDX55	DDX55			3	2	2	1	0	2	2	1	1	1	0	2	1	0	2	2	1	1	1	0	65.19	0	33.477	5.4	2.5	0	5.4	5.4	2.5	2.5	2.5	0	442020000	53893000	0	1.65304e+08	271210000	120750000	0	1.30653e+08	0	52166000	0	1.73887e+07	7.51371
F5H3Y4;Q8IY37	Probable ATP-dependent RNA helicase DHX37	DHX37			2	5	2	0	2	3	1	2	1	0	0	2	0	2	3	1	2	1	0	0	110.69	0	9.5094	2.5	0	2.3	3.3	1	2	1.3	0	0	163170000	0	220290000	127820000	378350000	29376000	151580000	1.86435e+08	70024000	0	0	2.33413e+07	7.98735
F5H658;Q14562	ATP-dependent RNA helicase DHX8	DHX8			2	3	2	0	1	2	0	1	0	0	0	2	0	1	2	0	1	0	0	0	134	0	6.1825	3.1	0.8	1.4	3.1	0	0.8	0.8	0.8	0.8	146080000	0	34315000	6.01317e+07	180590000	0	0	6.01967e+07	0	0	0	0	#DIV/0!
Q6XZF7;A0A1C7CYY6;A0A1B0GTX1	Dynamin-binding protein	DNMBP			3	2	2	0	1	1	0	0	0	0	0	2	0	1	1	0	0	0	0	0	177.35	0	6.48	2.3	0	0.9	0.9	0	0	0	0	0	212890000	0	53628000	8.88393e+07	178010000	0	0	5.93367e+07	0	0	0	0	#DIV/0!
Q02413	Desmoglein-1	DSG1	GOCC:0030057,GOCC:0001533	Desmosome,Cornified envelope	1	2	0	0	1	0	0	2	0	0	0	0	0	1	0	0	2	0	0	0	113.75	0	10.038	0	0	1.5	0	0	2.9	0	0	0	0	0	68518000	2.28393e+07	0	0	292180000	9.73933e+07	0	0	0	0	#DIV/0!
P32926	Desmoglein-3	DSG3	GOCC:0030057,GOCC:0001533	Desmosome,Cornified envelope	1	6	2	0	2	4	0	3	2	0	0	2	0	2	4	0	3	2	0	0	107.53	0	28.878	3.1	0	3.1	6.4	0	5.3	3.8	0	0	165460000	0	262060000	1.42507e+08	343650000	0	272590000	2.05413e+08	104980000	0	0	3.49933e+07	5.87007
E7EUN9;Q9NX74;J3QLD5	tRNA-dihydrouridine(20) synthase [NAD(P)+]-like	DUS2			3	2	1	2	1	1	1	0	0	0	0	1	2	1	1	1	0	0	0	0	51.388	0	6.6333	2.8	6.6	2.8	2.8	3.7	0	0	0	0	90000000	187460000	61394000	1.12951e+08	247490000	57182000	0	1.01557e+08	0	0	0	0	#DIV/0!
Q5JPH6;H3BTB7	Probable glutamate--tRNA ligase, mitochondrial	EARS2			2	8	5	1	2	5	3	1	2	1	1	5	1	2	5	3	1	2	1	1	58.688	0	63.236	11.9	2.9	4.4	11.3	6.7	1.9	4.2	1.9	1.9	585370000	89311000	122480000	2.6572e+08	818610000	315420000	83280000	405770000	145610000	134120000	35576000	105102000	3.86073
J3KTF5;Q9BQ95;K7EN32	Evolutionarily conserved signaling intermediate in Toll pathway, mitochondrial	ECSIT			3	2	1	0	1	1	0	0	0	0	0	1	0	1	1	0	0	0	0	0	26.248	0	8.4721	12.1	0	12.1	4.5	0	0	0	0	0	88020000	0	74812000	5.42773e+07	69016000	0	0	2.30053e+07	0	0	0	0	#DIV/0!
Q9H8V3;C9JDB4;C9J1C4;H7C3G1	Protein ECT2	ECT2	GOCC:0043296	Apical junction complex	4	5	1	1	2	2	2	1	0	0	2	1	1	2	2	2	1	0	0	2	103.5	0	25.061	1.4	1.4	3	2.8	3.1	1.4	0	0	3	0	54604000	274740000	1.09781e+08	205590000	171000000	37165000	1.37918e+08	0	0	59389000	1.97963e+07	6.96686
X6RAC9;P47813;O14602;A6NJH9	Eukaryotic translation initiation factor 1A, X-chromosomal	EIF1AX			4	3	0	1	0	0	1	0	0	1	0	0	1	0	0	1	0	0	1	0	13.232	0.0011994	3.2901	0	8.6	0	0	11.2	0	0	10.3	0	0	96893000	0	3.22977e+07	0	42929000	0	1.43097e+07	0	0	0	0	#DIV/0!
Q5SR36;P78545	ETS-related transcription factor Elf-3	ELF3			2	2	0	1	0	0	2	0	0	0	0	0	1	0	0	2	0	0	0	0	24.763	0	5.7959	0	6.5	0	0	12.1	0	0	0	0	0	142910000	0	4.76367e+07	0	189550000	0	6.31833e+07	0	0	0	0	#DIV/0!
A0A3B3ITP0;A0A2R8Y7Y3;A0A2R8YD30;A0A2U3TZH6;P11171;A0A2R8Y6T6;A0A3B3ITC5;A0A1B0GWG0;A0A2R8Y6D0;A0A2R8Y420;A0A2R8Y7N0;A0A3B3IUD6;A0A2R8YFR9;A0A2R8Y6G5;A0A2R8YCW8;A0A2R8Y570;A0A2R8Y5G2;A0A2R8Y5Z6;A0A3B3IU06;A0A2R8Y4N6	Band 4.1	EPB41			20	3	3	0	0	3	1	0	0	0	0	3	0	0	3	1	0	0	0	0	60.539	0	12.764	10.1	2.8	2.8	10.1	5	2.8	0	2.8	2.8	394130000	0	0	1.31377e+08	335430000	28088000	0	1.21173e+08	0	0	0	0	#DIV/0!
Q8IUS5	Epoxide hydrolase 4	EPHX4			1	3	1	0	1	1	1	0	0	0	0	1	0	1	1	1	0	0	0	0	42.324	0	5.8084	2.5	0	2.5	3	3.3	0	0	0	0	131160000	0	78916000	7.00253e+07	46894000	43744000	0	3.02127e+07	0	0	0	0	#DIV/0!
Q9H201;I6L9I8;D6RBR6;D6RFG3;D6REL6;D6R907;D6RBI9;Q9Y6I3	Epsin-3	EPN3			8	4	2	2	0	2	2	0	0	2	0	2	2	0	2	2	0	0	2	0	68.221	0	67.088	5.2	5.1	0	5.2	4.9	0	0	3.6	0	487740000	135990000	0	207910000	832530000	174700000	0	3.35743e+08	0	113840000	0	3.79467e+07	8.84777
Q96RT1;B4DIP2;H0YA04;H0Y9E8;B1AKT2	Erbin	ERBIN	GOCC:0005604	Basement membrane	5	47	18	12	38	16	14	25	10	9	9	18	11	36	15	13	22	10	9	9	158.3	0	323.31	17.3	13.5	35.3	16.4	13.7	24.9	10.6	10.4	8.1	5500600000	1850800000	18420000000	8.59047e+09	4487200000	1689000000	9265600000	5.14727e+09	1613700000	1229100000	1196200000	1.34633e+09	3.82317
P30040;F8VY02	Endoplasmic reticulum resident protein 29	ERP29			2	3	3	1	0	2	0	1	0	1	0	3	1	0	2	0	1	0	1	0	28.993	0	7.3327	14.2	3.8	0	8.4	0	5.7	0	3.8	0	333980000	69364000	0	134448000	210370000	0	81922000	9.74307e+07	0	63809000	0	2.12697e+07	4.58073
K7EKI0;Q92817	Envoplakin	EVPL	GOCC:0030057,GOCC:0001533	Desmosome,Cornified envelope	2	26	19	2	5	17	6	2	4	3	1	19	2	5	17	6	2	4	3	1	233.83	0	197.34	12.3	1.2	3	11.4	4.2	1.3	2.8	2.3	0.5	3246100000	165930000	443840000	1285290000	2923700000	229280000	120180000	1.09105e+09	456610000	236080000	137270000	2.76653e+08	3.94376
Q15910;G3XAL2;A0A0A0MSY9;Q92800	Histone-lysine N-methyltransferase EZH2	EZH2			4	2	1	1	0	1	0	0	1	1	0	1	1	0	1	0	0	1	1	0	85.362	0	6.6921	2.4	2.4	0	2.4	0	0	1.7	2.4	0	713070000	151890000	0	288320000	723740000	0	0	2.41247e+08	53285000	297370000	0	116885000	2.06397
F8W881;Q9NX05	Constitutive coactivator of PPAR-gamma-like protein 2	FAM120C			2	4	1	1	0	0	3	0	1	0	0	1	1	0	0	3	0	1	0	0	99.351	0	9.1089	1.6	1.6	0	0	4.5	0	1.5	1.6	0	306940000	71126000	0	126022000	0	159390000	0	53130000	50868000	0	0	16956000	3.1334
A0A494C1T9;Q6ZRV2;J3KPS2	Protein FAM83H	FAM83H			3	7	3	0	0	5	0	1	2	0	0	3	0	0	5	0	1	2	0	0	149.06	0	28.638	3.6	0	0	6.4	0	1.3	2.3	0	0	354850000	0	0	1.18283e+08	645070000	0	0	2.15023e+08	121140000	0	0	40380000	5.325
O94887;C9JWM9;C9JVQ5	FERM, ARHGEF and pleckstrin domain-containing protein 2	FARP2			3	5	2	1	3	3	2	3	1	1	2	1	1	2	2	2	2	1	1	1	119.89	0	19.432	2.9	2	4.3	4.1	2.7	4.3	2	2	2.3	602910000	103740000	475260000	393970000	794370000	101750000	466130000	4.54083e+08	99650000	130510000	0	76720000	5.91871
Q53R41	FAST kinase domain-containing protein 1, mitochondrial	FASTKD1			1	2	1	0	0	2	0	0	0	0	0	1	0	0	2	0	0	0	0	0	97.41	0.00091743	3.5291	1.1	0	0	2.7	0	0	0	0	0	58957000	0	0	1.96523e+07	56399000	0	0	1.87997e+07	0	0	0	0	#DIV/0!
A0A0A0MTN9;J3QQX3;A0A0C4DFN8;A0A0C4DGN7;A0A0A0MSZ4;A0A0A0MT64;P22570;A0A0A0MTR6;J3QKZ8;J3QQW7	NADPH:adrenodoxin oxidoreductase, mitochondrial	FDXR			10	10	9	0	3	9	0	3	8	0	3	9	0	3	9	0	3	8	0	3	48.027	0	44.969	27.1	0	7.5	27.1	0	8.7	23.7	0	10	3585500000	0	418040000	1.33451e+09	4101100000	0	578840000	1559980000	925660000	0	195150000	3.73603e+08	4.1755
F8VY01;Q6ZV73	FYVE, RhoGEF and PH domain-containing protein 6	FGD6			2	3	2	0	0	1	0	0	0	0	1	2	0	0	1	0	0	0	0	1	135.5	0.00062402	3.8291	3	0	0	1.1	0	0	0	0	0.7	139550000	0	0	4.65167e+07	1025400000	0	0	341800000	0	0	35487000	11829000	28.8951
Q53EP0;C9JKH7	Fibronectin type III domain-containing protein 3B	FNDC3B			2	25	19	6	8	17	13	6	13	8	6	19	6	8	17	13	6	13	8	6	132.89	0	323.31	23	7.2	11.8	21	15.8	8.6	15.9	9.8	8.1	7429900000	724430000	1148400000	3100910000	6752600000	2136300000	698720000	3.19587e+09	2450500000	843090000	725420000	1339670000	2.38557
B3KVN2;P49354	Protein farnesyltransferase/geranylgeranyltransferase type-1 subunit alpha	FNTA			2	2	1	2	0	1	0	0	0	2	0	1	2	0	1	0	0	0	2	0	27.443	0	9.4145	4.4	10.1	0	4.4	0	0	0	10.1	0	62326000	84923000	0	49083000	54475000	0	0	1.81583e+07	0	0	0	0	#DIV/0!
P51116;I3L1Z2	Fragile X mental retardation syndrome-related protein 2	FXR2			2	6	2	2	2	2	1	3	1	2	1	2	2	2	2	1	3	1	2	1	74.222	0	17.322	6.7	5.5	8.8	6.7	4.6	8.6	4.5	8.8	4.6	142420000	155320000	200790000	1.66177e+08	163390000	38260000	192850000	131500000	79069000	95509000	0	5.81927e+07	2.25973
P10253	Lysosomal alpha-glucosidase	GAA			1	2	2	0	0	1	0	0	0	0	0	2	0	0	1	0	0	0	0	0	105.32	0.0086277	2.0604	2.3	0	0	1.3	0	0	0	0	0	115840000	0	0	3.86133e+07	48953000	0	0	1.63177e+07	0	0	0	0	#DIV/0!
Q8WUU5;A0A2R8Y4H1	GATA zinc finger domain-containing protein 1	GATAD1			2	2	1	1	0	1	0	0	0	0	0	1	1	0	1	0	0	0	0	0	28.69	0.00032196	4.3561	6.7	5.6	0	6.7	0	0	0	0	0	130330000	62707000	0	6.43457e+07	123530000	0	0	4.11767e+07	0	0	0	0	#DIV/0!
Q92947;K7EQ99;K7ESA6;K7EKT3	Glutaryl-CoA dehydrogenase, mitochondrial	GCDH			4	5	2	1	1	3	2	2	3	1	1	2	1	1	3	2	2	3	1	1	48.127	0	39.935	5.9	3.9	3.9	11.4	5.9	5.9	9.1	3.9	2.7	506140000	161430000	84016000	2.50529e+08	561410000	145680000	240040000	315710000	268690000	78545000	0	115745000	2.72763
A0A6I8PS19;A0A6I8PL80;Q9NVN8	Guanine nucleotide-binding protein-like 3-like protein	GNL3L			3	4	4	3	2	3	1	2	1	1	2	4	3	2	3	1	2	1	1	2	58.012	0	25.913	12.8	9.3	6.6	10.1	2.7	6.6	3.9	3.9	6.6	954150000	367060000	349790000	557000000	836030000	120140000	288740000	414970000	62871000	162090000	205450000	1.4347e+08	2.89237
P00390;A0A2R8YF59;H0YC68	Glutathione reductase, mitochondrial	GSR			3	3	1	2	0	1	0	0	0	1	0	1	2	0	1	0	0	0	1	0	56.256	0	6.1269	2.3	4.8	0	2.1	0	0	0	2.3	0	64902000	88515000	0	51139000	134490000	0	0	44830000	0	62520000	0	20840000	2.15115
H0YFF7;F5GWD3;Q13889;F5H6X0;A0A087WYD5;F5GXG6;F5GX35;F5H4K7	General transcription factor IIH subunit 3	GTF2H3			8	2	1	1	1	1	0	1	0	0	0	1	1	1	1	0	1	0	0	0	21.876	0.0028145	2.4814	4.1	3.6	4.1	4.1	0	4.1	0	0	0	102130000	0	56352000	5.28273e+07	0	0	42112000	1.40373e+07	0	0	0	0	#DIV/0!
Q92759;A0A0G2JHJ2	General transcription factor IIH subunit 4	GTF2H4			2	2	2	0	1	2	0	1	0	0	1	2	0	1	2	0	1	0	0	1	52.186	0	4.9633	5.8	0	3	5.8	0	3	0	0	3	524910000	0	0	174970000	448550000	0	0	1.49517e+08	0	0	0	0	#DIV/0!
Q9UBP9;B8ZZL1	PTB domain-containing engulfment adapter protein 1	GULP1			2	2	1	0	0	2	1	1	0	0	0	1	0	0	2	1	1	0	0	0	34.49	0.0041701	2.3243	2.6	0	0	4.9	2.6	2.6	0	0	0	97337000	0	0	3.24457e+07	101070000	103480000	111010000	1.05187e+08	0	0	0	0	#DIV/0!
O95714;A0A3B3IRP6;A0A0J9YVP0;A0A0J9YXQ8	E3 ubiquitin-protein ligase HERC2	HERC2			4	5	1	1	1	2	1	1	0	0	0	1	1	1	2	1	1	0	0	0	527.22	0	10.332	0.3	0.3	0.3	0.6	0.2	0.3	0	0	0	136870000	158830000	131180000	1.42293e+08	143100000	36611000	0	5.99037e+07	0	0	0	0	#DIV/0!
P35914;H0Y2L7	Hydroxymethylglutaryl-CoA lyase, mitochondrial	HMGCL			2	8	3	1	3	1	8	2	1	1	2	3	1	3	1	8	2	1	1	2	34.36	0	36.004	12.3	4.3	12.3	4.3	27.7	8	4.3	4.6	8	491940000	169160000	340040000	3.33713e+08	117780000	850450000	249900000	4.06043e+08	74234000	0	283560000	1.19265e+08	3.40456
D6RCD0;Q8NBQ5	Estradiol 17-beta-dehydrogenase 11	HSD17B11			2	2	1	0	2	1	0	1	0	0	1	1	0	2	1	0	1	0	0	1	28.102	0	8.2455	5.9	0	9	5.9	0	5.9	0	0	5.9	85686000	0	54565000	4.67503e+07	118750000	0	84034000	6.75947e+07	0	0	45794000	1.52647e+07	4.42818
Q3SXM5;H3BQI7;H3BT52	Inactive hydroxysteroid dehydrogenase-like protein 1	HSDL1			3	5	3	0	1	3	2	1	0	0	1	3	0	1	3	2	1	0	0	1	37.001	0	10.215	8.8	0	2.1	7.6	6.7	2.1	0	0	2.1	336730000	0	55837000	1.30856e+08	180820000	82865000	80559000	114748000	0	0	80585000	2.68617e+07	4.27181
P98160;A0A3B3IT11;A0A0U1RQT3	Basement membrane-specific heparan sulfate proteoglycan core protein	HSPG2	GOCC:0005604	Basement membrane	3	15	12	2	0	8	1	1	0	0	0	12	2	0	8	1	1	0	0	0	468.83	0	50.182	4.1	0.7	0	2.8	0.3	0.3	0	0	0	1569300000	46933000	0	5.38744e+08	965210000	53777000	135590000	384859000	0	0	0	0	#DIV/0!
Q9NV31	U3 small nucleolar ribonucleoprotein protein IMP3	IMP3			1	2	1	0	1	1	1	2	0	0	1	1	0	1	1	1	2	0	0	1	21.85	0	5.1324	8.2	0	8.2	8.2	8.2	15.2	0	0	7.1	254430000	0	621460000	2.91963e+08	184990000	69744000	322380000	1.92371e+08	0	0	63495000	21165000	9.08913
Q16352;E7EMV2;E7ESP9;P07196;P07197	Alpha-internexin; 160 kDa neurofilament protein	INA			5	2	0	1	1	1	0	1	0	0	0	0	1	1	1	0	1	0	0	0	55.39	0.0068009	2.1542	0	2.4	1.6	1.6	0	1.6	0	0	0	0	59906000	279730000	113212000	583040000	0	233670000	2.72237e+08	0	0	0	0	#DIV/0!
Q6P9B9	Integrator complex subunit 5	INTS5			1	6	2	3	3	2	4	2	2	1	2	2	3	3	2	4	2	2	1	2	107.99	0	12.909	2.5	4.1	5.9	2.5	5.4	2.5	2.5	1.6	2.5	209940000	233590000	241570000	2.28367e+08	197630000	288700000	133030000	2.06453e+08	30383000	92366000	149400000	9.07163e+07	2.27581
A0A096LNZ9;A0A096LPJ4;P05161	Ubiquitin-like protein ISG15	ISG15			3	2	1	1	1	1	2	1	0	0	0	1	1	1	1	2	1	0	0	0	15.562	0.00061824	3.7012	6.3	6.3	6.3	6.3	12.6	6.3	0	0	0	141780000	152050000	161180000	151670000	172090000	355230000	168540000	2.31953e+08	0	0	0	0	#DIV/0!
A0A087WVF7;Q9NZM3;E7EPJ2	Intersectin-2	ITSN2			3	8	6	1	4	7	3	2	2	1	2	6	1	4	7	3	2	2	1	2	191.6	0	33.522	4.6	0.9	3.2	5.7	2.6	1.9	2	0.6	1.7	1453700000	69078000	364600000	629126000	1449400000	166890000	281190000	6.32493e+08	238640000	119110000	302400000	220050000	2.87432
A0A5F9ZHW0;A0A5F9ZH07;A0A5F9ZHN8;A0A5F9ZI39;P23458	Tyrosine-protein kinase JAK1	JAK1			5	4	3	1	2	3	1	1	1	0	0	3	1	2	3	1	1	1	0	0	53.316	0	13.822	8.3	3.2	5.6	8.3	2.4	2.4	3.2	0	0	980320000	197580000	170620000	4.49507e+08	490170000	19847000	64667000	1.91561e+08	232590000	0	0	77530000	2.4708
P14923;C9JK18;C9JKY1;C9J826;C9JTX4;C9JPI2;K7ERP3	Junction plakoglobin	JUP	GOCC:0043296,GOCC:0005912,GOCC:0016342,GOCC:0005915,GOCC:0030057,GOCC:0001533,GOCC:0044291	Apical junction complex,Adherens junction,Catenin complex,Zonula adherens,Desmosome,Cornified envelope,Cell-cell contact zone	7	46	31	28	41	28	22	41	18	22	19	28	26	36	25	20	36	16	20	17	81.744	0	323.31	49.9	51.8	61.1	47.5	36.8	66.3	33.6	38.4	32.8	42325000000	20291000000	210460000000	9.10253e+10	35745000000	9844900000	115410000000	5.36666e+10	7691200000	5133800000	6837600000	6554200000	8.18813
O95251;E7EUP3;A0A6Q8PHH2	Histone acetyltransferase KAT7	KAT7			3	2	0	1	0	0	1	0	0	0	0	0	1	0	0	1	0	0	0	0	70.642	0.0020029	2.661	0	1.8	0	0	1.8	0	0	0	0	0	120040000	0	4.00133e+07	0	33885000	0	11295000	0	0	0	0	#DIV/0!
Q5T5P2;Q5T5P0;Q5T5P1;A0A0U1RRK8	Sickle tail protein homolog	KIAA1217			4	37	5	4	32	8	5	28	2	3	3	5	4	32	8	5	28	2	3	3	214.11	0	317.72	4.6	3.8	21.5	6	3.4	19.9	1.8	2.7	2.6	1336200000	396040000	9751500000	3.82791e+09	1811700000	194630000	6388900000	2798410000	95462000	222420000	263350000	193744000	14.4439
Q5VZ46	Uncharacterized protein KIAA1614	KIAA1614			1	2	1	0	1	1	2	1	0	0	1	1	0	1	1	2	1	0	0	1	126.6	0.0020444	2.9179	0.7	0	0.7	0.7	0.8	0.7	0	0	0.7	183790000	0	171380000	118390000	116160000	216500000	89962000	140874000	0	0	123270000	41090000	3.42843
Q15058	Kinesin-like protein KIF14	KIF14			1	3	2	0	0	0	1	0	0	0	0	2	0	0	0	1	0	0	0	0	186.49	0	6.2534	1.3	0	0	0	0.5	0	0	0	0	209230000	0	0	6.97433e+07	0	69565000	0	2.31883e+07	0	0	0	0	#DIV/0!
A0A087WWA3;Q4R9M9;O60333;H7C0K6;A0A3F2YNW9;A0A3B3IUA1;A0A3B3IU40;A0A3B3IT28;A0A3B3ITE5;A0A3B3ITF7;A0A3B3ITW6;Q12756	Kinesin-like protein KIF1B	KIF1B			12	3	1	0	2	1	0	0	0	1	1	1	0	1	1	0	0	0	0	0	202.01	0	7.3691	0.9	0	1.3	0.9	0	0	0	0.7	0.7	336800000	0	440620000	259140000	315090000	0	0	105030000	0	70762000	0	2.35873e+07	4.45281
O95235;D6R9E4;D6RBN1	Kinesin-like protein KIF20A	KIF20A			3	2	1	0	1	1	0	0	0	0	0	1	0	1	1	0	0	0	0	0	100.28	0	5.5414	1.8	0	1.8	1.5	0	0	0	0	0	97852000	0	0	3.26173e+07	60777000	0	0	20259000	0	0	0	0	#DIV/0!
A0A7I2V5Y5;Q02241;A0A2U3TZL8;H7BYN4	Kinesin-like protein KIF23	KIF23			4	8	4	1	0	4	1	0	2	0	2	4	1	0	4	1	0	2	0	2	111.7	0	29.397	5.1	1.3	0	6.1	1.6	0	2.1	0	2.5	400320000	0	0	133440000	838250000	17933000	0	2.85394e+08	49386000	0	68139000	39175000	7.28511
Q13887	Krueppel-like factor 5	KLF5			1	2	2	2	1	2	1	0	1	2	0	2	2	1	2	1	0	1	2	0	50.791	0	15.524	13.6	13.6	5	13.6	7	2	7	13.6	2	733210000	238910000	145780000	3.72633e+08	802370000	128150000	0	3.10173e+08	93153000	203570000	0	9.89077e+07	3.13599
A0A7P0TAI3;Q8NEZ4;A0A7P0Z448;A0A7P0TA60;H7BY37;H0Y765;H7C2V8;A0A7P0T8F0;A0A7P0T9K8	Histone-lysine N-methyltransferase 2C	KMT2C			9	3	2	0	0	1	1	0	0	0	0	2	0	0	1	1	0	0	0	0	525.03	0	27.913	0.7	0	0	0.3	0.1	0	0	0	0	61605000	0	0	20535000	201640000	149810000	0	117150000	0	0	0	0	#DIV/0!
C9JVN9;Q9H9P8;G3V5S1;G3V272	L-2-hydroxyglutarate dehydrogenase, mitochondrial	L2HGDH			4	3	1	0	0	0	1	1	0	0	0	1	0	0	0	1	1	0	0	0	48.475	0.0011969	3.2714	2.7	0	0	0	3.4	1.6	0	0	0	101020000	0	0	3.36733e+07	0	95438000	139220000	7.82193e+07	0	0	0	0	#DIV/0!
A0A0A0MTS5;A0A0A6YYF2;A0A3B3ITG1;A0A0A0MSA0;Q16787;K7EIP4	HCG1811249, isoform CRA_f	LAMA3	GOCC:0005604	Basement membrane	6	6	4	2	1	5	1	2	1	0	0	4	2	1	5	1	2	1	0	0	184.02	0	56.248	2.9	1	1	4.3	0.5	1.6	0.5	0	0	345670000	329930000	45778000	2.40459e+08	1057100000	42764000	66399000	3.88754e+08	203240000	0	0	6.77467e+07	5.73835
P11047	Laminin subunit gamma-1	LAMC1	GOCC:0005604	Basement membrane	1	3	3	0	0	1	0	0	0	0	0	3	0	0	1	0	0	0	0	0	177.6	0	7.4949	2.9	0	0	0.9	0	0	0	0	0	106130000	0	0	3.53767e+07	58531000	0	0	1.95103e+07	0	0	0	0	#DIV/0!
H0YHF4;F8VR33;H0YIV5;F8VS60;F8W1Z2;F8VP71;F8VVQ3;F8VZA2;Q6P1Q0;F8W0R0	LETM1 domain-containing protein 1	LETMD1	GOCC:0005912	Adherens junction	10	2	1	0	1	1	1	1	0	0	1	1	0	1	1	1	1	0	0	1	10.588	0.00033003	4.7811	12.2	0	12.2	12.2	13.3	12.2	0	0	12.2	85391000	0	73449000	5.29467e+07	91952000	53476000	112880000	8.61027e+07	0	0	67792000	2.25973e+07	3.8103
Q9UGP4;C9JRJ5;G3V5F5;G3V481;K7EKM1;A6NIX2	LIM domain-containing protein 1	LIMD1			6	5	0	1	3	0	1	0	0	0	0	0	1	3	0	0	0	0	0	0	72.189	0	13.305	0	1.8	7.8	0	1.2	0	0	0	0	0	90090000	256080000	115390000	0	48519000	0	16173000	0	0	0	0	#DIV/0!
A0A0M3HER1;A0A0J9YXC7;P48059;Q7Z4I7	LIM and senescent cell antigen-like-containing domain protein 1	LIMS1			4	2	1	1	1	1	1	0	1	0	0	1	1	1	1	1	0	1	0	0	24.307	0.00033036	4.816	5.7	5.3	5.7	5.7	5.7	0	5.7	0	0	606780000	72458000	407230000	362156000	534110000	135760000	0	223290000	206670000	0	0	68890000	3.24125
H0YAR1;Q9Y4K0	Lysyl oxidase homolog 2	LOXL2	GOCC:0005604	Basement membrane	2	2	1	0	0	1	0	0	0	0	0	1	0	0	1	0	0	0	0	0	22.279	0	6.9708	8.2	0	0	9.7	0	0	0	0	0	109560000	0	0	36520000	115740000	0	0	38580000	0	0	0	0	#DIV/0!
Q7L5N7;H3BU68	Lysophosphatidylcholine acyltransferase 2	LPCAT2			2	6	2	1	0	2	1	1	1	1	0	2	1	0	2	1	1	1	1	0	60.207	0	14.496	3.7	1.3	0	3.7	1.7	2.2	3.9	2.2	0	210220000	376610000	0	195610000	277730000	64538000	25443000	1.2257e+08	74532000	0	0	24844000	4.9336
Q643R3	Lysophospholipid acyltransferase LPCAT4	LPCAT4			1	2	1	0	0	0	1	0	0	0	0	1	0	0	0	1	0	0	0	0	57.218	0	11.095	2.7	0	0	0	5.2	0	0	0	0	81425000	0	0	2.71417e+07	0	131650000	0	4.38833e+07	0	0	0	0	#DIV/0!
Q93052;A0A087WZF1;C9JUT4;C9JXK9;C9JIY7;C9JT42;C9J3U9;C9J1K7;C9J5C8;C9J4E3;C9JE51;C9J2R5	Lipoma-preferred partner	LPP			12	21	3	8	16	3	7	7	1	6	2	3	8	16	3	7	7	1	6	2	65.746	0	212.46	5.1	21.9	38.1	5.1	22.4	18.8	3.9	13.7	5.6	1015200000	1592800000	5898800000	2835600000	546560000	608820000	1305300000	8.20227e+08	86706000	841730000	186910000	371782000	2.2062
Q9H9A6	Leucine-rich repeat-containing protein 40	LRRC40			1	8	3	3	4	3	0	3	1	1	0	3	3	4	3	0	3	1	1	0	68.249	0	13.211	7	5	7.8	7	0	6	1.8	1.7	0	374690000	336840000	369960000	3.60497e+08	236420000	0	161770000	132730000	0	68134000	0	2.27113e+07	5.84422
Q9BX40;Q5TBP9	Protein LSM14 homolog B	LSM14B			2	2	1	0	1	0	2	0	0	0	0	1	0	1	0	2	0	0	0	0	42.07	0	7.9905	2.9	0	2.9	0	6	0	0	0	0	182650000	0	78061000	8.69037e+07	0	116200000	0	3.87333e+07	0	0	0	0	#DIV/0!
Q9NQ29;A8MYV2;B8ZZ10;F8WBC1;F2Z322;B8ZZ08	Putative RNA-binding protein Luc7-like 1	LUC7L			6	3	1	2	2	1	1	1	1	1	0	1	2	2	1	1	1	1	1	0	43.727	0	11.501	6.2	15.9	11.3	6.2	10	13.2	3	8.9	5.9	132330000	139290000	279320000	1.83647e+08	77499000	76469000	258040000	137336000	79707000	108940000	0	6.28823e+07	2.18402
Q5H907;Q5H909;Q9UNF1	Melanoma-associated antigen D2	MAGED2			3	4	0	3	3	1	1	2	0	1	1	0	3	3	1	1	2	0	1	1	55.795	0	10.563	0	8.4	9.6	4	1.3	5.4	0	4.4	1.3	0	103690000	163020000	8.89033e+07	65011000	41686000	102380000	6.96923e+07	0	0	36739000	1.22463e+07	5.69087
P46734;J3QR49;P52564	Dual specificity mitogen-activated protein kinase kinase 3	MAP2K3			3	2	0	1	0	0	1	1	0	1	0	0	1	0	0	1	1	0	1	0	39.318	0	5.415	0	4.6	0	0	4.6	4.6	0	4.6	0	0	121930000	0	4.06433e+07	0	49107000	105020000	5.13757e+07	0	57548000	0	1.91827e+07	2.67823
Q9Y4K4	Mitogen-activated protein kinase kinase kinase kinase 5	MAP4K5			1	2	0	1	0	0	1	0	0	0	0	0	1	0	0	1	0	0	0	0	95.023	0.00063151	4.0033	0	1.9	0	0	1.7	0	0	0	0	0	44237000	0	1.47457e+07	0	60219000	0	20073000	0	0	0	0	#DIV/0!
P28482	Mitogen-activated protein kinase 1	MAPK1			1	2	0	2	0	0	1	0	0	0	0	0	2	0	0	1	0	0	0	0	41.389	0.00061406	3.5904	0	6.9	0	0	2.5	0	0	0	0	0	122190000	0	40730000	0	23767000	0	7.92233e+06	0	0	0	0	#DIV/0!
Q96RQ3;E9PHF7;F5GYT8;E9PG35;G5E9X5;F8WDI3	Methylcrotonoyl-CoA carboxylase subunit alpha, mitochondrial	MCCC1			6	39	22	17	26	24	22	37	18	17	20	22	17	26	24	22	37	18	17	20	80.472	0	323.31	44.8	36.8	47	43	41.9	53.4	31	31.7	39	21998000000	7269200000	50369000000	26545400000	26560000000	13437000000	153730000000	6.45757e+10	9050700000	6768700000	17211000000	1.10101e+10	5.86511
O60318	Germinal-center associated nuclear protein	MCM3AP			1	5	2	0	2	3	0	4	0	0	1	2	0	2	3	0	4	0	0	1	218.4	0	30.23	1.8	0	1.7	2.5	0	2.9	0	0	0.9	0	0	214720000	7.15733e+07	76708000	0	325670000	134126000	0	0	103630000	3.45433e+07	3.88283
D6RIZ4;D6RA47;D6RE79;Q14728	Major facilitator superfamily domain-containing protein 10	MFSD10			4	2	1	1	1	2	1	1	0	0	2	1	1	1	2	1	1	0	0	2	38.247	0	13.345	3.7	3.7	3.7	6.2	3.7	3.7	0	0	6.2	214030000	248270000	88135000	1.83478e+08	309860000	247060000	110330000	2.22417e+08	0	0	249550000	8.31833e+07	2.67381
G3V599;Q96PC5;G3V5K6;A4FU28;A0A5F9ZHA4;A0A2R8YE69;Q8IX95;Q96RT6;Q8IX94;Q86UF2;P0CG41;A4D2H0	Melanoma inhibitory activity protein 2	MIA2	GOCC:0070971	Endoplasmic reticulum exit site	12	10	6	1	0	6	1	0	2	1	0	6	1	0	6	1	0	2	1	0	151.72	0	87.874	6.5	1.3	0	5.8	1.5	0	2.5	0.9	0	1880200000	105160000	0	6.61787e+08	1136200000	49154000	0	395118000	288080000	57563000	0	1.15214e+08	3.42942
Q5JRA6;A0A0A0MRH6	Transport and Golgi organization protein 1 homolog	MIA3	GOCC:0070971	Endoplasmic reticulum exit site	2	21	14	4	1	13	3	1	4	3	1	14	4	1	13	3	1	4	3	1	213.7	0	110.78	10.3	2.8	0.7	9.3	2	0.7	2.5	2.1	0.7	3602400000	351560000	234670000	1396210000	3275200000	113460000	131920000	1.17353e+09	837050000	419720000	126690000	4.61153e+08	2.54476
Q8IYU8;A0A0A0MTD5	Calcium uptake protein 2, mitochondrial	MICU2			2	3	1	0	1	1	1	1	0	2	1	1	0	1	1	1	1	0	2	1	49.666	0	47.369	3.9	0	3.9	3.9	3.5	3.9	0	8.5	3.9	420820000	0	186650000	202490000	518500000	81918000	133850000	244756000	0	39287000	145950000	6.17457e+07	3.96394
Q8N4C8;A0A590UJE1;I3L2I2	Misshapen-like kinase 1	MINK1			3	6	0	0	6	1	1	2	0	0	1	0	0	6	1	1	2	0	0	1	149.82	0	77.032	2	0.5	9.7	3.5	2.4	4.2	0.5	0.5	2.3	0	0	848740000	2.82913e+08	51462000	81502000	218120000	117028000	0	0	90643000	3.02143e+07	3.87326
S4R3P5;Q96EY8;F5H4Z7	Corrinoid adenosyltransferase	MMAB			3	2	1	0	0	1	1	0	1	0	0	1	0	0	1	1	0	1	0	0	21.776	0	55.627	10.1	0	0	10.1	5.1	0	10.1	0	0	108090000	0	0	36030000	117320000	48741000	0	5.53537e+07	48821000	0	0	1.62737e+07	3.40143
P22033	Methylmalonyl-CoA mutase, mitochondrial	MMUT			1	11	4	1	6	6	2	5	3	0	3	4	1	6	6	2	5	3	0	3	83.134	0	36.646	6.3	2	9.2	9.6	2.1	8.1	6.4	0	4.5	470310000	68237000	502050000	3.46866e+08	545240000	109320000	638080000	430880000	256210000	0	248900000	168370000	2.55913
Q9Y6X9;A0A6Q8PGC6;H7C1V1	ATPase MORC2	MORC2			3	4	2	1	0	3	0	1	0	1	1	2	1	0	3	0	1	0	1	1	117.82	0	6.6253	2.3	1.5	0	3.4	0	1.5	0	0.9	1.5	235320000	76148000	0	1.03823e+08	327290000	0	74618000	1.33969e+08	0	32889000	119080000	5.06563e+07	2.64467
Q14149	MORC family CW-type zinc finger protein 3	MORC3			1	3	1	1	0	1	0	0	1	0	0	1	1	0	1	0	0	1	0	0	107.11	0	7.5811	2.1	2.2	0	2.1	0	0	1.2	0	0	94467000	0	0	31489000	88168000	0	0	2.93893e+07	25067000	0	0	8.35567e+06	3.51729
P03928	ATP synthase protein 8	MT-ATP8			1	3	2	3	2	2	2	2	1	2	1	2	3	2	2	2	2	1	2	1	7.9916	0	8.7463	29.4	32.4	29.4	29.4	29.4	29.4	16.2	29.4	16.2	881700000	464470000	493660000	6.13277e+08	1114700000	553180000	329440000	6.65773e+08	104350000	455770000	167160000	2.42427e+08	2.74629
H0YB81;H0YBI9;A0A7P0T9S8;A0A7P0TB86;A0A7P0T9I0;A0A7P0Z4R0;A0A7P0TB43;A0A7P0TBB3;A0A7P0T9Q8;A0A7P0TAU1;A0A7P0Z471;A0A7P0T957;A0A7P0TA27;Q9Y2Z2;A0A7P0T9M7;A0A7P0T9M4;A0A7P0TB93;A0A7P0TAK2;A0A7P0T8Y9;A0A7P0Z482;A0A7P0Z443;A0A7P0T8X3;E9PHR8;E5RFF7;A0A7P0Z4D4;E7EWI1;A0A7P0T851	Protein MTO1 homolog, mitochondrial	MTO1			27	4	2	0	0	2	0	2	1	0	0	2	0	0	2	0	2	1	0	0	57.566	0	6.7768	5	0	0	5.2	0	5.2	3.1	0	0	317870000	0	0	1.05957e+08	174060000	0	127760000	1.00607e+08	50933000	0	0	1.69777e+07	5.92582
A0A0G2JSA8;A0A0G2JNX3;A0A0G2JM47;A0A0G2JR84;A0A0G2JR26;E9PH32;A0A0G2JSE2;A0A0G2JRM4;A0A0G2JRI9;A0A0G2JN31;A0A0G2JRT2;C9JJE7;Q8N307	Mucin-20	MUC20			13	2	2	1	1	1	1	2	0	0	0	2	1	1	1	1	2	0	0	0	51.307	0	5.8599	7.2	3.8	3.8	3.8	3.4	7.2	0	0	0	247150000	119500000	142750000	169800000	87931000	37829000	181090000	1.02283e+08	0	0	0	0	#DIV/0!
A0A0G2JM16;A0A0G2JQK9;A0A0G2JR97;A0A0G2JS65;A0A0G2JPA4;A0A0G2JNL3;A0A0G2JN54;A0A0G2JRT1;A0A0G2JQC6;E7EWN1;A0A0G2JMX1;A0A0G2JQT8;E7ENC5;A0A0G2JNM3;A0A0G2JRA1;E9PDY6;A0A0G2JRS2;A0A0G2JR46;A0A0G2JRD8;A0A0G2JRY3;A0A0G2JRJ6;A0A0G2JQI2;Q99102;A0A0G2JRW3;A0A0G2JRE6;A0A0G2JQA9;E7EW47;A0A0G2JS42;A0A0G2JS91;A0A0G2JRW6;A0A0G2JSB4;A0A0G2JRV5;A0A0G2JSD9;E7EQG8;A0A0G2JQN9;A0A0G2JS19;E7ERK0;E7EUL9;E7EQT2;A0A0G2…	Mucin-4	MUC4			54	5	1	1	2	2	0	1	0	0	0	1	1	2	2	0	1	0	0	0	531.17	0	14.018	0.3	0.4	0.4	0.5	0	0.2	0	0	0	0	48776000	61978000	36918000	0	0	65922000	21974000	0	0	0	0	#DIV/0!
Q9Y6Q9	Nuclear receptor coactivator 3	NCOA3			1	5	5	0	0	3	0	0	0	0	0	5	0	0	3	0	0	0	0	0	155.29	0	26.125	5.2	0	0	3.3	0	0	0	0	0	367030000	0	0	1.22343e+08	283690000	0	0	9.45633e+07	0	0	0	0	#DIV/0!
O75376;A0A088AWL3;E7EVK1;E7EVU5;E7EW50;J3KS51;C9JAP0;J3KT44	Nuclear receptor corepressor 1	NCOR1			8	28	21	11	4	18	9	4	11	10	6	20	11	4	17	9	4	11	10	6	270.21	0	180	12.8	6.1	2.8	11.4	5.7	2.5	7.5	5.7	4.1	5095400000	1007000000	542660000	2215020000	5182200000	742010000	418330000	2114180000	1317000000	992530000	580790000	963440000	2.19441
C9JE98;C9J0Q5;Q9Y618;C9J7T7;A0A384DVL6;C9JQE8;C9J330;H0YGK8;H7C1J7;H7C1Y3;H7C0P3	Nuclear receptor corepressor 2	NCOR2			11	15	10	1	1	11	2	1	2	1	2	10	1	1	11	2	1	2	1	2	268.04	0	76.285	6.9	1.2	0.6	7.6	1.1	0.7	2.2	1.2	1.2	1488100000	142870000	82667000	5.71212e+08	1643400000	78616000	0	5.74005e+08	279630000	130160000	153830000	1.87873e+08	3.05528
O75306;A0A7I2YQD8;A0A7I2V4G5;A0A7I2V4X8;A0A7I2V596;A0A7I2YQG7;A0A7I2V630;A0A7I2V410;A0A7I2V4W5;A0A7I2V2B9;A0A7I2V3J6;A0A7I2V5E2;A0A7I2V5G4;A0A7I2V517;A0A7I2V5D5	NADH dehydrogenase [ubiquinone] iron-sulfur protein 2, mitochondrial; Complex I-49kD	NDUFS2			15	11	5	4	4	5	6	3	3	3	1	5	4	4	5	6	3	3	3	1	52.545	0	46.313	11.7	13.4	9.5	11	15.8	7.8	7.6	9.3	2.6	968110000	1023100000	743050000	911420000	1019400000	1832500000	283770000	1.04522e+09	394230000	777870000	92003000	4.21368e+08	2.48055
Q92692	Nectin-2	NECTIN2	GOCC:0043296,GOCC:0005912,GOCC:0005915	Apical junction complex,Adherens junction,Zonula adherens	1	3	0	0	3	0	0	1	0	0	0	0	0	3	0	0	1	0	0	0	57.741	0.00061767	3.697	0	0	5.4	0	0	1.5	0	0	0	0	0	342420000	114140000	0	0	86078000	2.86927e+07	0	0	0	0	#DIV/0!
A0A590UK73;B1AKN7;B1AKN5;A0A590UK09;B1AKN8;Q12857;S4R308;K7EMQ5;A0A590UJA3;K7ESG9;K7EKH0;K7EJB0;S4R3W2;S4R3K4;A0A590UJ82;A0A590UJU2;A0A590UK38;B1AKN6;C9JWJ8;K7EN08;B4DHW2;Q14938	Nuclear factor 1	NFIA			22	2	1	0	0	2	0	0	0	0	0	1	0	0	2	0	0	0	0	0	36.615	0.0020367	2.8518	4	0	0	8	0	0	0	0	0	18345000	0	0	6115000	105300000	0	0	35100000	0	0	0	0	#DIV/0!
Q6T4R5;A0A087WU78;A0A087WWC4	Nance-Horan syndrome protein	NHS	GOCC:0043296	Apical junction complex	3	7	0	0	7	1	0	0	0	0	0	0	0	7	1	0	0	0	0	0	179.13	0	13.689	0	0	6	0.7	0	0	0	0	0	0	0	846950000	2.82317e+08	30413000	0	0	1.01377e+07	0	0	0	0	#DIV/0!
Q9BZQ8	Protein Niban 1	NIBAN1			1	7	1	3	2	1	3	2	0	0	0	1	3	2	1	3	2	0	0	0	103.13	0	28.904	0.9	4.7	1.9	0.9	5.3	1.9	0	0	0	62800000	296110000	205740000	1.88217e+08	63064000	309860000	65457000	146127000	0	0	0	0	#DIV/0!
O15226	NF-kappa-B-repressing factor	NKRF			1	7	2	0	3	3	0	2	1	0	1	2	0	3	3	0	2	1	0	1	77.672	0	9.3388	4.9	0	6.5	6.2	0	2.6	2.9	0	2	185690000	0	277740000	1.54477e+08	303170000	0	270940000	191370000	91741000	0	49406000	47049000	4.06746
Q13423;A0A590UK15;A0A590UJM2;A0A590UK29;E9PCX7;D6RHU2;A0A590UJA4;A0A590UKC7;D6RAI5;A0A590UJI3;D6RCR6	NAD(P) transhydrogenase, mitochondrial; Proton-translocating NAD(P)(+) transhydrogenase	NNT			11	12	8	1	3	10	4	1	5	1	1	8	1	3	10	4	1	5	1	1	113.89	0	66.848	10.7	1.8	3.7	11.5	5	1.2	6.4	1.2	0.9	1903300000	133030000	360400000	798910000	2205600000	412350000	112120000	9.10023e+08	763760000	214190000	30898000	3.36283e+08	2.70613
O75052;E9PSG0;E9PIP8	Carboxyl-terminal PDZ ligand of neuronal nitric oxide synthase protein	NOS1AP			3	9	0	1	8	1	0	5	0	0	3	0	1	8	1	0	4	0	0	2	56.149	0	177.09	0	3.8	26.3	3.8	0	14.6	0	0	10.9	0	120840000	2096500000	7.39113e+08	189120000	0	1042000000	4.10373e+08	0	0	413030000	1.37677e+08	2.9807
Q04721	Neurogenic locus notch homolog protein 2	NOTCH2			1	6	3	0	1	4	1	0	2	0	0	3	0	1	4	1	0	2	0	0	265.4	0	14.616	1.5	0	0.6	2	0.4	0	1.3	0	0	336820000	0	0	1.12273e+08	452930000	31329000	0	1.6142e+08	108750000	0	0	36250000	4.45296
Q96CB9;M0R1K5	5-methylcytosine rRNA methyltransferase NSUN4	NSUN4			2	3	1	0	0	0	3	0	0	0	0	1	0	0	0	3	0	0	0	0	43.088	0	7.5458	2.9	0	0	0	11.7	0	0	0	0	276570000	0	0	92190000	0	304380000	0	101460000	0	0	0	0	#DIV/0!
Q9BZD4;E9PQC4	Kinetochore protein Nuf2	NUF2			2	3	0	2	0	0	1	0	0	0	0	0	2	0	0	1	0	0	0	0	54.303	0	6.1705	0	7.8	0	0	3	0	0	0	0	0	288000000	0	96000000	0	47551000	0	1.58503e+07	0	0	0	0	#DIV/0!
Q9UHK0	Nuclear fragile X mental retardation-interacting protein 1	NUFIP1			1	3	1	0	0	1	1	1	0	0	0	1	0	0	1	1	1	0	0	0	56.299	0.0011908	3.2004	2.2	0	0	2.2	1.4	2.2	0	0	0	75507000	0	0	25169000	57542000	0	0	1.91807e+07	0	0	0	0	#DIV/0!
Q8TEM1	Nuclear pore membrane glycoprotein 210	NUP210			1	45	9	10	34	9	16	41	15	12	13	9	10	34	9	16	41	15	12	13	205.11	0	323.31	4.8	6.9	21.2	5.6	11.9	25.8	10.4	7.5	7.4	2843000000	1706500000	37208000000	1.39192e+10	3265900000	2791500000	71121000000	2.57261e+10	3071400000	1760400000	3584600000	2.80547e+09	9.17
Q9UBU9;E9PLA7;E9PIN3;H0YDU0;B4E227	Nuclear RNA export factor 1	NXF1			5	3	1	0	1	0	0	1	0	1	0	1	0	1	0	0	1	0	1	0	70.182	0.00091241	3.459	1.1	0	1.1	0	0	2.4	0	1.8	0	53834000	0	59520000	3.77847e+07	0	0	69808000	2.32693e+07	0	32343000	0	10781000	2.15837
A0A0G2JMZ8;Q16625	Occludin	OCLN	GOCC:0043296	Apical junction complex	2	4	0	2	3	2	1	1	0	1	2	0	2	3	2	1	1	0	1	2	59.129	0	10.57	0	6.9	4.4	6.5	2.3	2.3	0	2.3	6.9	0	227660000	736180000	321280000	192220000	19565000	97132000	1.02972e+08	0	40282000	81123000	4.04683e+07	2.54452
U3KQU8;C9JLB7;Q96HP4	Oxidoreductase NAD-binding domain-containing protein 1	OXNAD1			3	5	3	1	2	4	4	1	2	0	3	3	1	2	4	4	1	2	0	3	34.725	0	12.971	11.6	3.5	8.7	15.4	16.4	2.9	9	0	12.5	480770000	131470000	203530000	2.71923e+08	618670000	192520000	0	2.70397e+08	164510000	0	215000000	1.26503e+08	2.13747
O96013;M0R1R1;M0R3G6;M0R2X4;M0R0L9	Serine/threonine-protein kinase PAK 4	PAK4			5	5	2	2	2	2	1	1	1	0	0	2	2	2	2	1	1	1	0	0	64.071	0	10.031	3.4	4.4	3.4	3.4	1.4	2	2.4	0	0	217270000	177700000	116120000	1.70363e+08	115640000	25952000	37505000	59699000	44608000	0	0	1.48693e+07	4.01491
Q7L3T8	Probable proline--tRNA ligase, mitochondrial	PARS2			1	6	3	3	2	4	0	1	1	1	1	3	3	2	4	0	1	1	1	1	53.262	0	17.341	8	6.1	5.1	10.7	0	2.9	2.3	1.5	1.5	246800000	232080000	95698000	191526000	464350000	0	94633000	1.86328e+08	0	40587000	64027000	3.48713e+07	5.34329
P11498;A0A494C016;A0A494C101;A0A494C0T2;E9PRE7;A0A494BZT5	Pyruvate carboxylase, mitochondrial	PC			6	81	49	45	64	49	58	70	43	35	51	48	45	63	48	58	69	43	35	50	129.63	0	323.31	47.5	48.9	56.1	45.9	54.9	58.4	47.1	41.4	52.2	57402000000	22371000000	218350000000	9.93743e+10	67816000000	47260000000	401980000000	172352000000	23038000000	16039000000	65085000000	3.47207e+10	4.96396
P05165;A0A1B0GU58;A0A1B0GWI4;A0A1B0GUX9;A0A1B0GWA1;A0A1B0GTR1;H0Y5U0;Q5JTW6;Q5JVH2;H0Y4B9;H0Y798	Propionyl-CoA carboxylase alpha chain, mitochondrial	PCCA			11	47	17	15	39	19	20	46	7	8	22	17	15	39	19	20	46	7	8	22	80.058	0	323.31	32.7	31.3	53.6	37.5	37.1	60.7	15.8	17.7	36.7	6695800000	3985800000	57563000000	22748200000	8896100000	7937700000	122220000000	4.63513e+10	860570000	1094200000	8373800000	3.44286e+09	13.463
E7EUY3;E9PDR0;E7EX59;P05166;E7ETT1;C9JQS9;E7ETT4;E9PEC3;F8WBI9;E7ENC1;H7C5C9;C9JVW9;C9JVY9;C9JAW3	Propionyl-CoA carboxylase beta chain, mitochondrial	PCCB			14	24	8	10	19	8	11	21	3	3	16	8	10	19	8	11	21	3	3	16	55.708	0	232.99	22.1	29.8	43.8	22.1	27.9	48.4	7.8	9.9	39.1	1422500000	1540300000	16169000000	6.37727e+09	1208800000	1692500000	12602000000	5.16777e+09	393910000	347150000	6263800000	2.33495e+09	2.21322
O94913;E9PKN0;E9PQ01;E9PNY7;E9PQF9	Pre-mRNA cleavage complex 2 protein Pcf11	PCF11			5	8	6	1	0	5	2	0	1	0	0	6	1	0	5	2	0	1	0	0	173.05	0	43.462	5.3	0.7	0	4.7	1.7	0	1	0	0	574930000	0	0	1.91643e+08	514200000	68084000	0	1.94095e+08	70365000	0	0	23455000	8.27519
Q5EBL8	PDZ domain-containing protein 11	PDZD11			1	3	1	0	3	1	0	2	0	0	0	1	0	3	1	0	2	0	0	0	16.131	0	68.874	7.1	0	30.7	17.1	0	24.3	0	0	0	127330000	0	1290400000	4.72577e+08	387350000	0	555290000	3.14213e+08	0	0	0	0	#DIV/0!
Q13608	Peroxisome assembly factor 2	PEX6			1	10	4	2	1	5	4	1	2	2	2	4	2	1	5	4	1	2	2	2	104.06	0	46.297	6.3	4.8	2.7	7.8	7.2	0.7	4.6	4.6	1.4	815180000	487260000	196100000	4.99513e+08	778730000	510360000	37201000	442097000	196820000	254970000	133760000	1.95183e+08	2.26503
Q96G03;E9PD70;E7ENQ8	Phosphoglucomutase-2	PGM2			3	5	1	2	2	0	4	2	0	1	0	1	2	2	0	4	2	0	1	0	68.283	0	20.579	2.8	6.5	6.5	0	10.6	5.2	0	2.8	0	128520000	334500000	230550000	231190000	0	411140000	160530000	1.90557e+08	0	113760000	0	37920000	5.02523
Q13492;H0YCY1;E9PJT1;E9PK13;E9PI56;E9PKP6;E9PLJ8;E5RFU0;E5RHK9;E5RFC6;E5RK51;E5RIJ5;E5RGY9;E9PDG8;O60641	Phosphatidylinositol-binding clathrin assembly protein	PICALM			15	15	10	4	4	14	4	3	6	3	3	8	4	4	10	3	3	4	3	3	70.754	0	228.06	21	11.7	12	26.8	8.9	6.6	14.7	6.6	6.6	10648000000	1175200000	1061700000	4.29497e+09	14862000000	642900000	921940000	5.47561e+09	3869500000	1086000000	726710000	1894070000	2.89092
A8MYT4;A0A1W2PS05;Q8NEB9;K7ENH3;K7EIV6;K7EKH3	Phosphatidylinositol 3-kinase catalytic subunit type 3	PIK3C3			6	2	0	0	1	0	0	1	0	1	0	0	0	1	0	0	1	0	1	0	94.399	0.00063816	4.1882	0	0	1.7	0	0	1.7	0	1.8	0	0	0	154410000	51470000	0	0	102450000	34150000	0	44736000	0	14912000	2.2901
Q99569;A0A0D9SF60;E7EST6;H0YFB1;B4DRK2;E9PHB5;E7EPC8;Q9UQB3;E9PHJ1;E7EP40;E7EMY7	Plakophilin-4	PKP4	GOCC:0005912,GOCC:0030057,GOCC:0001533	Adherens junction,Desmosome,Cornified envelope	11	24	8	3	20	10	3	14	0	3	2	8	3	20	10	3	14	0	3	2	131.87	0	168.95	10.8	3.3	25.7	12.6	3.8	19.3	0	3.7	3	791430000	226910000	3781600000	1599980000	959540000	198060000	1754500000	970700000	0	220710000	144630000	121780000	7.97093
Q9HAU0;B4DJX4;A0JP02;H0YGJ6;H0YG48;F5H1X3	Pleckstrin homology domain-containing family A member 5	PLEKHA5			6	28	7	2	24	7	0	11	0	1	0	7	2	24	7	0	11	0	1	0	127.46	0	291.97	9	2.8	27.4	9.6	0	13.1	0	1.7	0	771810000	210670000	10354000000	3.77883e+09	1157100000	0	2566900000	1.24133e+09	0	58559000	0	1.95197e+07	63.594
Q5VTI5;Q9Y2H5;A0A1B0GUN5	Pleckstrin homology domain-containing family A member 6	PLEKHA6			3	39	4	3	37	5	2	23	1	1	2	4	3	32	4	1	19	1	1	2	119.29	0	203.22	5.7	4.3	33.9	6.5	2.8	27	1	1.7	2.5	759290000	331040000	27224000000	9438110000	1085700000	117840000	12163000000	4.45551e+09	73449000	61568000	85628000	7.35483e+07	60.5794
E9PKC0;A0A1B0GTN9;Q6IQ23;H0YDE2;A0A1B0GUM1;A0A1B0GUN0	Pleckstrin homology domain-containing family A member 7	PLEKHA7	GOCC:0043296,GOCC:0005912,GOCC:0005915	Apical junction complex,Adherens junction,Zonula adherens	6	7	2	0	7	1	0	1	0	0	0	2	0	7	1	0	1	0	0	0	144.42	0	63.647	2.8	0	9.2	0.6	0	1.6	0	0	0	79498000	0	883320000	3.20939e+08	60870000	0	43193000	3.46877e+07	0	0	0	0	#DIV/0!
Q9UIW2;P51805;O75051	Plexin-A1	PLXNA1			3	5	2	0	2	1	2	1	0	1	0	2	0	1	1	2	1	0	1	0	211.06	0	33.559	2.1	0	0.9	1.6	1.5	1.1	0	0.5	0	173220000	0	94700000	8.93067e+07	86590000	87280000	37823000	7.05643e+07	0	54385000	0	1.81283e+07	3.89249
C9IZF6;P41247	Patatin-like phospholipase domain-containing protein 4	PNPLA4			2	2	2	0	0	1	0	0	0	0	0	2	0	0	1	0	0	0	0	0	20.649	0	13.92	16.8	0	0	7.9	0	0	0	0	0	176490000	0	0	58830000	157580000	0	0	5.25267e+07	0	0	0	0	#DIV/0!
A0A384DVU0;Q8IY17;M0QYF5;M0QZK5;M0R2H4;M0R2K2;A0A2R8Y7E1	Patatin-like phospholipase domain-containing protein 6	PNPLA6			7	6	5	2	1	3	0	4	1	1	0	5	2	1	3	0	4	1	1	0	149.92	0	16.977	6.2	2.4	1.2	3.4	0	4.4	1.2	1.2	0	611070000	187420000	153750000	3.17413e+08	588700000	0	327360000	3.05353e+08	122680000	111600000	0	7.80933e+07	3.91011
Q9H9Y6;H7C0D9	DNA-directed RNA polymerase I subunit RPA2	POLR1B			2	5	0	0	1	1	0	1	0	0	3	0	0	1	1	0	1	0	0	3	128.23	0	12.426	0	0	1.2	1.4	0	1.2	0	0	3.1	0	0	142530000	47510000	79632000	0	147280000	7.56373e+07	0	0	64076000	2.13587e+07	3.54129
Q8WUF5;K7EN03	RelA-associated inhibitor	PPP1R13L			2	9	2	3	8	3	0	6	1	0	4	2	3	8	3	0	6	1	0	4	89.09	0	83.111	3.1	5.1	13	5	0	10.9	1.9	0	6.6	167300000	318120000	2974600000	1153340000	1001700000	0	2540800000	1.18083e+09	105840000	0	525260000	2.10367e+08	5.61322
Q9HCU5;H7C2N7;B5MC98	Prolactin regulatory element-binding protein	PREB	GOCC:0070971	Endoplasmic reticulum exit site	3	2	0	1	0	2	0	0	0	0	0	0	1	0	2	0	0	0	0	0	45.468	0.00061709	3.6713	0	3.1	0	6	0	0	0	0	0	0	21811000	0	7.27033e+06	59916000	0	0	19972000	0	0	0	0	#DIV/0!
Q9ULL5;A0A3Q5ADB5	Proline-rich protein 12	PRR12			2	5	5	0	0	4	0	0	0	0	0	5	0	0	4	0	0	0	0	0	211.04	0	22.735	5	0	0	4	0	0	0	0	0	662120000	0	0	2.20707e+08	650950000	0	0	2.16983e+08	0	0	0	0	#DIV/0!
Q5JSZ5	Protein PRRC2B	PRRC2B			1	16	14	4	0	12	2	0	1	2	1	14	4	0	12	2	0	1	2	1	242.96	0	124.27	9.2	2.8	0	8.1	1.8	0	0.5	1.5	0.9	1924900000	349700000	0	758200000	1934500000	263960000	0	732820000	78771000	174130000	94766000	115889000	6.32346
Q9BT73	Proteasome assembly chaperone 3	PSMG3			1	2	1	0	1	0	0	1	0	0	0	1	0	1	0	0	1	0	0	0	13.104	0	6.771	19.7	0	10.7	0	0	19.7	0	0	0	125570000	0	103270000	76280000	0	0	106730000	3.55767e+07	0	0	0	0	#DIV/0!
O14684	Prostaglandin E synthase	PTGES			1	3	1	0	0	1	2	1	0	0	0	1	0	0	1	2	1	0	0	0	17.102	0.00033201	4.8836	6.6	0	0	6.6	13.2	5.3	0	0	0	240390000	0	0	80130000	189230000	311080000	303720000	268010000	0	0	0	0	#DIV/0!
Q9H3S7;C9JD91	Tyrosine-protein phosphatase non-receptor type 23	PTPN23			2	5	0	3	0	0	2	0	0	0	0	0	3	0	0	2	0	0	0	0	178.97	0	5.2173	0	2.9	0	0	2.1	0	0	0	0	0	238580000	0	7.95267e+07	0	101640000	0	33880000	0	0	0	0	#DIV/0!
Q8TB72;A0A0C4DG68;C9JW01	Pumilio homolog 2	PUM2			3	3	0	1	0	0	2	0	1	0	0	0	1	0	0	2	0	1	0	0	114.21	0.00033025	4.8088	0	2.2	1.7	0.8	2.5	0.8	1.1	0.8	1	0	61987000	0	2.06623e+07	0	1523800000	0	5.07933e+08	0	0	0	0	#DIV/0!
E9PK47;P06737	Glycogen phosphorylase, liver form	PYGL			2	8	0	7	3	1	3	0	0	1	0	0	7	3	1	3	0	0	1	0	94.069	0	28.585	0	13.9	7.6	1.6	8.4	3.5	1.5	1.5	0	0	555840000	409530000	321790000	59964000	141880000	0	6.72813e+07	0	74822000	0	2.49407e+07	2.69766
H7C207;Q15032	R3H domain-containing protein 1	R3HDM1			2	2	1	0	0	0	1	0	0	0	0	1	0	0	0	1	0	0	0	0	88.059	0.003089	2.4585	1.6	0	0	0	2.1	0	0	0	0	98251000	0	0	3.27503e+07	0	15293000	0	5.09767e+06	0	0	0	0	#DIV/0!
Q86YS6	Ras-related protein Rab-43	RAB43			1	5	2	0	1	1	4	1	0	1	0	2	0	1	1	4	1	0	1	0	23.339	0	20.716	11.8	0	5.2	5.2	21.2	5.2	0	5.2	0	227610000	0	88180000	1.05263e+08	128500000	336370000	79445000	1.81438e+08	0	51366000	0	17122000	10.5968
P51151;A0A1B0GUI0;Q9NP90	Ras-related protein Rab-9A	RAB9A			3	3	1	2	1	2	3	2	0	2	0	1	2	1	2	3	2	0	2	0	22.837	0	11.418	5.5	12.9	5.5	11.4	18.9	12.9	0	12.9	0	194020000	251490000	196820000	214110000	323170000	229840000	248230000	267080000	0	245790000	0	81930000	3.25986
Q92696;H0YLG7;H0YLH3	Geranylgeranyl transferase type-2 subunit alpha	RABGGTA			3	2	1	0	0	0	0	2	0	0	0	1	0	0	0	0	2	0	0	0	65.071	0.0020243	2.781	2.6	0	0	0	0	6.2	0	0	0	34254000	0	0	11418000	0	0	39290000	1.30967e+07	0	0	0	0	#DIV/0!
A0A5F9ZHG7;E9PCH4;Q8TEU7;D6RE77;B7Z7Y1;A0A2R8Y661;A0A2R8YGD3;Q9Y4G8	Rap guanine nucleotide exchange factor 6	RAPGEF6			8	3	0	0	2	0	0	2	0	0	0	0	0	2	0	0	2	0	0	0	141.91	0	10.897	0	0	2.7	0	0	2.5	0	0	0	0	0	123800000	4.12667e+07	0	0	90605000	3.02017e+07	0	0	0	0	#DIV/0!
Q5T160;H0Y450	Probable arginine--tRNA ligase, mitochondrial	RARS2			2	7	5	0	0	3	1	2	1	0	1	5	0	0	3	1	2	1	0	1	65.505	0	24.56	12.6	0	0	7.1	2.8	3.3	2.8	0	2.4	478770000	0	0	159590000	246390000	186990000	67464000	166948000	127600000	0	90642000	7.27473e+07	2.2949
B0QYV1;A0A0G2JRA5;O43251;I3L1D4;A0A0G2JRD1;S4R3K7;S4R469;F8VR27;F8VZY7;A0A6Q8PHA3;A0A6Q8PGE0;B0QYY4;A0A6Q8PH77;A0A087X2B1;F8VRS4;J3KNW3;A0A6Q8PFM4;B7Z1U7;F8VZG9;A0A286YEU2;Q9NWB1;B0QYY6;A0A0G2JSB3;B0QYY7;A0A3B3ITL7;J3QQZ2;J3QRF4;A6NFN3	RNA binding protein fox-1 homolog 2	RBFOX2			28	4	1	0	1	3	0	1	0	0	1	1	0	1	3	0	1	0	0	1	37.865	0	56.897	7.3	0	7.3	10.4	0	2.5	0	0	2	593060000	0	271350000	2.88137e+08	229210000	0	75469000	1.0156e+08	0	0	0	0	#DIV/0!
Q96EV2;H0Y3K4;H7C0H2;A0A0C4DFS3;H7BXM6;A8MTF7	RNA-binding protein 33	RBM33			6	10	5	1	0	6	1	0	1	0	0	5	1	0	6	1	0	1	0	0	129.98	0	73.627	8.5	0.8	0	9.9	0.8	0	1.6	0	0	575180000	99947000	0	2.25042e+08	671810000	65627000	0	2.45812e+08	206550000	0	0	68850000	3.57026
Q96I51	RCC1-like G exchanging factor-like protein	RCC1L			1	4	3	0	0	3	1	0	0	1	0	3	0	0	3	1	0	0	1	0	49.996	0	15.384	10.8	0	0	12.1	2.2	0	0	3.9	0	370920000	0	0	123640000	475860000	116470000	0	1.97443e+08	0	71372000	0	2.37907e+07	8.29919
Q8IZV5;E5RK48	Retinol dehydrogenase 10	RDH10			2	4	1	1	2	0	2	2	0	1	0	1	1	2	0	2	2	0	1	0	38.087	0	6.8562	4.7	2.3	9.1	0	7	7	0	2.3	0	88178000	29401000	155990000	9.11897e+07	0	115250000	239310000	1.18187e+08	0	20437000	0	6.81233e+06	17.3489
Q13546;A0A7I2V404;A0A7I2V5Y1	Receptor-interacting serine/threonine-protein kinase 1	RIPK1			3	5	2	0	1	1	2	1	0	0	1	2	0	1	1	2	1	0	0	1	75.93	0	7.7411	3	0	2.5	1.5	4.3	1.5	0	0	1.6	166180000	0	60746000	75642000	143930000	87765000	62439000	9.80447e+07	0	0	0	0	#DIV/0!
A0A0A0MTJ5;Q01973	Inactive tyrosine-protein kinase transmembrane receptor ROR1	ROR1			2	2	1	1	1	1	0	1	0	0	0	1	1	1	1	0	1	0	0	0	98.363	0	9.7819	1.9	0.8	1.9	1.9	0	1.9	0	0	0	53570000	45634000	116880000	72028000	37141000	0	18872000	18671000	0	0	0	0	#DIV/0!
B4DG22;B1AXG1;B7ZB17;P51812;F2Z2J1;Q15349;B1AXG2;A0A2R8YGB7;D6RA62;D6RE03	Non-specific serine/threonine protein kinase	RPS6KA3			10	3	0	1	1	0	1	0	0	0	0	0	1	1	0	1	0	0	0	0	80.583	0.00064062	4.2669	0	1.5	1.4	0	5.5	1.1	0	0	1.1	0	84559000	55015000	4.65247e+07	0	78976000	0	2.63253e+07	0	0	0	0	#DIV/0!
Q8N122	Regulatory-associated protein of mTOR	RPTOR			1	9	5	3	4	3	2	4	0	3	1	5	3	4	3	2	4	0	3	1	149.04	0	26.238	4.7	3.2	4.9	2.9	2.6	4.4	0	2.6	1	646130000	143060000	331270000	3.73487e+08	283530000	44475000	333210000	220405000	0	187380000	80145000	89175000	2.4716
Q96CM3;E9PJV3	Mitochondrial RNA pseudouridine synthase RPUSD4	RPUSD4			2	2	0	1	0	2	0	0	0	0	0	0	1	0	2	0	0	0	0	0	42.205	0.0030934	2.4746	0	5	0	9.3	0	0	0	0	0	0	40862000	0	1.36207e+07	111310000	0	0	3.71033e+07	0	0	0	0	#DIV/0!
E9PL69;P23921;E9PP77;H0YCY7	Ribonucleoside-diphosphate reductase large subunit	RRM1			4	4	2	0	3	0	0	2	0	0	0	2	0	3	0	0	2	0	0	0	64.836	0	9.2357	4.4	0	6.3	0	0	4	0	0	0	96584000	0	38779000	45121000	0	0	21944000	7.31467e+06	0	0	0	0	#DIV/0!
H3BSM7;Q96GQ5;I3L2V0;H3BTA0;H3BS97;H3BR29	RUS family member 1	RUSF1			6	2	1	0	0	1	0	0	0	0	0	1	0	0	1	0	0	0	0	0	50.783	0.0057692	2.2296	1.9	0	0	2.4	0	0	0	0	0	123070000	0	0	4.10233e+07	142420000	0	0	4.74733e+07	0	0	0	0	#DIV/0!
P31949	Protein S100-A11	S100A11			1	5	0	4	0	0	1	1	0	0	0	0	4	0	0	1	1	0	0	0	11.74	0	34.796	0	47.6	0	0	10.5	8.6	0	0	0	0	678420000	0	226140000	0	94305000	148240000	8.08483e+07	0	0	0	0	#DIV/0!
A0A0A0MTP7;F8VXG7;Q99590	Protein SCAF11	SCAF11			3	2	1	0	1	1	1	1	0	0	0	1	0	1	1	1	1	0	0	0	106.01	0.00032563	4.5734	1.5	0	1	1.5	1.5	1	0	0	0	130460000	0	39261000	5.65737e+07	32308000	69113000	57270000	52897000	0	0	0	0	#DIV/0!
O95104	SR-related and CTD-associated factor 4	SCAF4			1	3	2	1	0	1	3	0	0	2	0	0	0	0	0	1	0	0	0	0	125.87	0	8.193	1.7	1	0	0.6	2.8	0	0	1.7	0	159290000	63866000	0	7.43853e+07	63731000	85190000	0	4.96403e+07	0	44787000	0	14929000	3.32509
O95487	Protein transport protein Sec24B	SEC24B	GOCC:0070971	Endoplasmic reticulum exit site	1	11	5	5	2	4	5	1	1	2	1	4	5	2	4	4	1	1	2	1	137.42	0	31.466	5.6	6.6	2.3	5.4	4.6	1.1	1.1	3.1	1.1	521260000	685410000	209430000	4.72033e+08	580040000	208520000	136260000	3.08273e+08	103120000	235510000	54286000	130972000	2.35373
E9PC44;E9PDM8;O94855	Protein transport protein Sec24D	SEC24D	GOCC:0070971	Endoplasmic reticulum exit site	3	2	1	1	1	0	0	1	0	0	0	1	1	1	0	0	1	0	0	0	43.94	0	5.0874	3.3	3.3	3.8	0	0	3.8	0	0	0	52819000	64590000	110480000	75963000	0	0	65873000	2.19577e+07	0	0	0	0	#DIV/0!
A0A087X142;A6NMH6;A6NFQ9;F8W8I8;Q92599;C9JV02;B1AMS2;Q14141;A0A0A0MRP8;C9J4G8	Septin	SEPTIN8			10	3	0	1	1	0	1	0	0	0	0	0	1	1	0	1	0	0	0	0	49.355	0.00033167	4.8749	0	11	4	0	9.9	0	6.1	8	0	0	95480000	100460000	6.53133e+07	0	77538000	0	25846000	0	0	0	0	#DIV/0!
Q96NB2;R4GMR9;R4GN74;R4GNC2;R4GN63;A0A1B0GX61;R4GMW0;A0A0C4DGR6	Sideroflexin-2	SFXN2			8	2	1	0	0	2	0	0	0	0	0	1	0	0	2	0	0	0	0	0	36.231	0.0022656	2.562	3.7	0	0	9	0	0	0	0	0	65306000	0	0	2.17687e+07	224240000	0	0	7.47467e+07	0	0	0	0	#DIV/0!
P29353;X6R6D0;Q5T181;Q5T182;H0Y539;P98077	SHC-transforming protein 1	SHC1			6	3	1	0	2	1	1	0	1	0	0	1	0	2	1	1	0	1	0	0	62.821	0	8.0619	3.4	0	5.8	3.4	2.4	0	2.1	0	0	101530000	0	199390000	1.00307e+08	89769000	38536000	0	4.27683e+07	33850000	0	0	1.12833e+07	3.7904
M0R0S2;M0QZF4;M0R2P6;Q8TBC3;M0R204;H0Y5P8;M0QYB1;M0R0E3;M0R0S1;Q9Y597	SH3KBP1-binding protein 1	SHKBP1			10	3	1	0	3	1	0	1	0	0	1	1	0	3	1	0	1	0	0	1	29.542	0	6.3553	4	0	17	4	0	4	0	0	4	119640000	0	404630000	1.74757e+08	97788000	0	76067000	5.79517e+07	0	0	60613000	2.02043e+07	2.86828
A0A2R8Y5P9;Q8TF72	Protein Shroom3	SHROOM3	GOCC:0043296	Apical junction complex	2	2	0	0	1	0	0	1	0	0	0	0	0	1	0	0	1	0	0	0	208.05	0.0020522	2.9636	0	0	0.7	0	0	1	0	0	0	0	0	32519000	1.08397e+07	0	0	174060000	58020000	0	0	0	0	#DIV/0!
O60292;M0R2Q7	Signal-induced proliferation-associated 1-like protein 3	SIPA1L3			2	17	0	0	17	0	0	3	0	0	0	0	0	17	0	0	3	0	0	0	194.61	0	144.61	0	0	15.5	0	0	3.6	0	0	0	0	0	2500800000	833600000	0	0	304440000	101480000	0	0	0	0	#DIV/0!
E9PM75;Q9NTG7;E9PNA0;E9PK80;E9PN58	NAD-dependent protein deacetylase sirtuin-3, mitochondrial	SIRT3			5	2	2	0	0	1	0	0	0	0	0	2	0	0	1	0	0	0	0	0	37.639	0	5.9651	6.4	0	0	3.2	0	0	0	0	0	209840000	0	0	6.99467e+07	192420000	0	0	64140000	0	0	0	0	#DIV/0!
P12755	Ski oncogene	SKI			1	2	2	0	0	1	0	0	0	0	0	2	0	0	1	0	0	0	0	0	80.004	0	5.9354	5.4	0	0	3.7	0	0	0	0	0	253840000	0	0	8.46133e+07	150630000	0	0	50210000	0	0	0	0	#DIV/0!
J3QQV2;J3KTM6;O15427;J3QRP8;J3QRA0;J3QSC3;J3QQS9	Monocarboxylate transporter 4	SLC16A3	GOCC:0016328	Lateral plasma membrane	7	3	0	0	1	1	1	1	0	0	0	0	0	1	1	1	1	0	0	0	44.478	0	9.6484	0	0	3.1	4.1	5.8	3.1	0	0	0	0	0	110860000	3.69533e+07	44191000	80270000	123100000	8.25203e+07	0	0	0	0	#DIV/0!
Q08357	Sodium-dependent phosphate transporter 2	SLC20A2			1	2	0	0	0	1	1	0	0	0	0	0	0	0	1	1	0	0	0	0	70.392	0	6.2598	0	0	0	3.4	2.8	0	0	0	0	0	0	0	0	128280000	75620000	0	6.79667e+07	0	0	0	0	#DIV/0!
B0QYW5;F6RTR7;O43808;F8WE74	Peroxisomal membrane protein PMP34	SLC25A17			4	3	0	2	0	1	1	0	1	0	0	0	2	0	1	1	0	1	0	0	25.721	0	26.471	0	11.6	0	8	4	0	8	0	0	0	168210000	0	56070000	534970000	53339000	0	196103000	67547000	0	0	2.25157e+07	8.70962
Q9HC21;J3KSI7;J3QL84;J3KS44;J3QLV3;J3KRY6;J3KSB1	Mitochondrial thiamine pyrophosphate carrier	SLC25A19			7	7	2	1	2	6	2	3	3	3	2	2	1	2	6	2	3	3	3	2	35.511	0	28.684	8.8	3.1	8.8	17.8	6.2	11.9	11.9	12.8	8.8	803280000	65836000	311140000	3.93419e+08	957810000	277020000	408810000	547880000	179670000	85967000	307780000	191139000	2.8664
B5MCR8;Q6NXT4	Solute carrier family 30 (Zinc transporter), member 6, isoform CRA_b	SLC30A6			2	2	1	0	2	1	0	1	0	0	1	1	0	2	1	0	1	0	0	1	42.509	0	6.7984	4.1	0	7.2	4.1	0	4.1	0	0	4.1	143810000	0	259170000	1.34327e+08	155250000	0	151450000	1.02233e+08	0	0	140050000	4.66833e+07	2.18993
Q9HBR0;I3L0Q8;H0YF92	Putative sodium-coupled neutral amino acid transporter 10	SLC38A10			3	3	1	0	0	3	1	0	0	0	0	1	0	0	3	1	0	0	0	0	119.76	0	7.3229	1.3	0	0	5.2	2.6	0	0	0	0	112240000	0	0	3.74133e+07	273870000	76373000	0	1.16748e+08	0	0	0	0	#DIV/0!
A0A0A0MST8;E9PFN4;C9JRP1;Q9Y6M7	Anion exchange protein	SLC4A7			4	3	1	0	1	1	1	1	0	0	2	1	0	1	1	0	1	0	0	2	134.57	0	33.94	1.5	0	1.5	1.5	1.4	1.5	0	0	2.5	562210000	0	582030000	3.81413e+08	874840000	75568000	693660000	5.48023e+08	0	0	545040000	181680000	3.01642
A0A0A0MRP6;B7ZLQ5;P28370	Probable global transcription activator SNF2L1	SMARCA1			3	4	0	1	1	2	1	0	0	0	1	0	1	1	2	1	0	0	0	1	122.86	0.00063432	4.0634	5	5.2	4.4	8.5	7	2.9	5.8	3.4	7.4	0	103660000	24113000	42591000	167000000	50230000	0	72410000	0	0	53393000	1.77977e+07	4.06851
Q8NBT2;A0A0A0MSN0;K7EJH0;K7EMX1;K7ESQ2;K7ERQ7;K7EJV2	Kinetochore protein Spc24	SPC24			7	4	1	2	0	0	1	0	0	1	0	1	2	0	0	1	0	0	1	0	22.478	0	15.328	6.6	10.7	0	0	10.7	0	0	10.7	0	40478000	165270000	0	6.85827e+07	0	123180000	0	41060000	0	7379400	0	2459800	16.6924
A0A7P0T9K0;J3QS22;A0A7P0TAS3;A0A7I2V562;A0A7P0Z4I1;A0A7P0TB87;A0A7I2V451;A0A7I2YQJ3;A0A7P0TBP2;A0A7I2V416;A0A7I2V486;Q5M775	Cytospin-B	SPECC1			12	2	1	0	2	1	0	1	0	0	0	1	0	2	1	0	1	0	0	0	80.214	0	7.9065	1.8	0	3.9	1.8	0	1.8	0	0	0	0	0	164140000	5.47133e+07	116670000	0	57445000	5.80383e+07	0	0	0	0	#DIV/0!
P12931;H2E272;H7C3Z8;H7C074;Q9H3Y6;P42685;Q04912	Proto-oncogene tyrosine-protein kinase Src	SRC			7	2	2	0	2	2	0	1	1	0	0	1	0	1	1	0	0	1	0	0	59.834	0	6.055	12.5	7.8	8	11.8	7.5	9	11.4	7.8	9.9	347710000	0	215210000	187640000	357880000	0	139050000	1.65643e+08	149930000	0	0	4.99767e+07	3.31441
P19623;K7EL89;K7ESL0;K7EQ47	Spermidine synthase	SRM			4	5	1	2	1	1	2	1	1	0	2	1	2	1	1	2	1	1	0	2	33.824	0	126.15	3.3	7.6	7.9	3.3	6	3.3	3.3	0	7	277870000	53444000	68075000	1.3313e+08	230820000	162900000	246720000	213480000	0	0	202420000	6.74733e+07	3.16392
P49458;Q6P2S0;Q659G3;E9PE20	Signal recognition particle 9 kDa protein	SRP9			4	3	1	3	1	1	1	1	1	1	1	1	3	1	1	1	1	1	1	1	10.112	0	16.2	10.5	34.9	10.5	10.5	10.5	10.5	10.5	22.1	10.5	0	505960000	0	1.68653e+08	0	152610000	243420000	132010000	0	50206000	136680000	6.22953e+07	2.1191
E9PIT5;Q8TE77;A0A087WWG1	Protein phosphatase Slingshot homolog 3	SSH3			3	2	1	1	1	1	0	0	0	0	0	1	1	1	1	0	0	0	0	0	24.628	0.00063959	4.2263	5.9	5.9	5.9	5.9	0	0	0	0	0	171260000	44072000	0	7.17773e+07	141850000	0	0	4.72833e+07	0	0	0	0	#DIV/0!
O75886	Signal transducing adapter molecule 2	STAM2			1	6	5	0	1	4	2	0	1	1	0	4	0	1	3	2	0	0	0	0	58.164	0	24.562	11.4	0	1.9	9.5	5.1	0	1.7	1.9	0	712800000	0	42269000	2.5169e+08	590130000	60786000	0	216972000	38698000	252930000	0	9.72093e+07	2.23201
Q15750	TGF-beta-activated kinase 1 and MAP3K7-binding protein 1	TAB1			1	3	2	1	0	3	0	0	0	0	0	2	1	0	3	0	0	0	0	0	54.643	0	6.5002	5.6	3	0	8.3	0	0	0	0	0	111890000	51982000	0	54624000	216360000	0	0	72120000	0	0	0	0	#DIV/0!
Q16594;D6RHW1;D6RIY1;D6RGK3;D6RIV9;D6RIE8	Transcription initiation factor TFIID subunit 9	TAF9			6	2	1	0	0	1	0	0	0	0	1	1	0	0	1	0	0	0	0	0	28.974	0.00063492	4.0949	8.3	0	0	8.3	0	0	0	0	3.8	81060000	0	0	27020000	70142000	0	0	2.33807e+07	0	0	0	0	#DIV/0!
Q9H2K8;G3V1Q8;F5GWV8	Serine/threonine-protein kinase TAO3	TAOK3			3	4	0	4	0	0	1	0	0	0	0	0	4	0	0	1	0	0	0	0	105.4	0.00032992	4.7694	0	5.7	0	0	1.7	0	0	0	0	0	339350000	0	1.13117e+08	0	51765000	0	17255000	0	0	0	0	#DIV/0!
A0A087X0F1;Q9UK61	Protein TASOR	TASOR			2	4	0	0	2	0	1	1	0	1	0	0	0	2	0	1	1	0	1	0	117.31	0.00032289	4.4648	0	0	2.2	0	0.9	0.9	0	1.4	0	0	0	129940000	4.33133e+07	0	399950000	87302000	1.62417e+08	0	19500000	0	6500000	24.9873
Q9NUY8;E9PGE5;C9IZ32;C9JAM5	TBC1 domain family member 23	TBC1D23			4	3	0	1	1	1	1	1	0	1	1	0	1	1	1	1	1	0	1	1	78.321	0	12.713	0	2	2	2	1.9	2	0	2	1.4	0	60595000	115560000	5.87183e+07	102660000	84224000	109460000	9.87813e+07	0	70297000	0	2.34323e+07	4.2156
A0A2R8Y358;A0A1W2PS94;Q9BXT5	Testis-expressed protein 15	TEX15			3	2	1	0	1	1	1	0	0	1	0	1	0	1	1	1	0	0	1	0	358.79	0.0020098	2.7007	0.4	0	0.4	0.6	0.3	0	0.2	0.3	0	114170000	0	86644000	66938000	175010000	141090000	0	1.05367e+08	0	53029000	0	1.76763e+07	5.96089
Q9GZM7;F6SDV2	Tubulointerstitial nephritis antigen-like	TINAGL1			2	2	2	0	0	2	0	0	0	0	0	2	0	0	2	0	0	0	0	0	52.387	0	5.9945	5.8	0	0	5.8	0	0	0	0	0	89122000	0	0	2.97073e+07	72038000	0	0	2.40127e+07	0	0	0	0	#DIV/0!
Q9HC07;V9GY93	Transmembrane protein 165	TMEM165			2	5	3	2	2	4	3	2	1	2	2	3	2	2	4	3	2	1	2	2	34.905	0	123.53	20.4	11.7	11.7	21	17.3	11.7	6.2	11.7	11.7	1697400000	568910000	1357300000	1207870000	1709700000	484880000	845170000	1013250000	271280000	497450000	716060000	494930000	2.04726
Q5SNT2;H0Y994;H0Y4R5	Transmembrane protein 201	TMEM201			3	2	2	1	1	1	0	1	0	1	0	2	1	1	1	0	1	0	1	0	72.235	0	5.7395	3.3	1.8	1.8	1.8	0	1.8	0	1.8	0	316860000	52671000	208790000	1.92774e+08	290750000	0	124740000	1.38497e+08	0	80948000	0	2.69827e+07	5.1328
Q96JJ7;H3BPB3;B4DIE3	Protein disulfide-isomerase TMX3	TMX3			3	2	1	0	0	2	0	0	0	0	0	1	0	0	2	0	0	0	0	0	51.871	0.00063837	4.1906	3.5	0	0	5.3	0	0	0	0	0	79810000	0	0	2.66033e+07	1666600000	0	0	5.55533e+08	0	0	0	0	#DIV/0!
Q03169;H0YLC0;H0YKI8;H0YM45;H0YKR7	Tumor necrosis factor alpha-induced protein 2	TNFAIP2			5	7	0	4	1	0	3	0	0	1	0	0	4	1	0	3	0	0	1	0	72.66	0	29.048	0	9.2	2.3	0	5.8	0	0	2.1	0	0	378330000	18411000	132247000	0	141140000	0	4.70467e+07	0	70347000	0	23449000	2.00634
Q13625;H7C5L8	Apoptosis-stimulating of p53 protein 2	TP53BP2			2	4	1	0	2	3	0	0	0	0	0	1	0	2	3	0	0	0	0	0	125.61	0	7.7786	1.3	0	1.9	3.6	0	0	0	0	0	85848000	0	66694000	5.08473e+07	144820000	0	0	4.82733e+07	0	0	0	0	#DIV/0!
A2AE48;Q12899;Q5SPU2;A0A0G2JIW2	Tripartite motif-containing protein 26	TRIM26			4	3	0	2	0	0	1	0	0	0	0	0	2	0	0	1	0	0	0	0	28.666	0.00063573	4.1308	0	9.3	0	0	4.4	0	0	0	0	0	85507000	0	2.85023e+07	0	16430000	0	5.47667e+06	0	0	0	0	#DIV/0!
P14373;A0A0G2JIZ4;A0A140T9Q6;A0A140T9B9;A0A140T9N6;A0A140T9V9;H0Y551	Zinc finger protein RFP	TRIM27			7	6	4	0	0	5	0	0	2	0	0	4	0	0	5	0	0	2	0	0	58.489	0	50.058	10.3	0	0	12.5	0	0	4.9	0	0	1052800000	0	0	3.50933e+08	1164800000	0	0	3.88267e+08	75300000	0	0	25100000	15.4688
A0A0G2JJX2;Q9BZY9;A0A140T9J6	E3 ubiquitin-protein ligase TRIM31	TRIM31			3	2	0	1	2	0	1	0	0	0	0	0	1	2	0	1	0	0	0	0	48.256	0	22.929	0	2.8	7.1	0	4.2	0	0	0	0	0	150690000	141770000	9.74867e+07	0	41264000	0	1.37547e+07	0	0	0	0	#DIV/0!
Q9BVS5;H7C2E8;F8WDR2	tRNA (adenine(58)-N(1))-methyltransferase, mitochondrial	TRMT61B			3	2	0	1	1	1	0	0	0	0	0	0	1	1	1	0	0	0	0	0	52.965	0.0028169	2.4898	0	2.5	2.1	2.1	0	0	0	0	0	0	0	16383000	5461000	79091000	0	0	2.63637e+07	0	0	0	0	#DIV/0!
Q2T9J0	Peroxisomal leader peptide-processing protease	TYSND1			1	2	2	0	0	1	0	0	1	0	0	2	0	0	1	0	0	1	0	0	59.308	0.00033179	4.8762	5.5	0	0	3.2	0	0	3.2	0	0	200820000	0	0	66940000	82184000	0	0	2.73947e+07	0	0	0	0	#DIV/0!
A0A0D9SG77;A0A6Q8PHE5;A0A1B0GVL3;Q05086;A0A0D9SF91	Ubiquitin-protein ligase E3A	UBE3A			5	5	1	3	1	2	0	2	0	0	0	1	3	1	2	0	2	0	0	0	88.082	0	13.401	1.8	4.8	1.4	3.5	0	3.1	0	0	0	0	111690000	87830000	6.65067e+07	51200000	0	153850000	68350000	0	0	0	0	#DIV/0!
Q9Y5Z9	UbiA prenyltransferase domain-containing protein 1	UBIAD1			1	2	1	0	0	1	0	1	0	0	0	1	0	0	1	0	1	0	0	0	36.831	0	10.261	5.6	0	0	5.6	0	3	0	0	0	74152000	0	0	2.47173e+07	67581000	0	58543000	4.20413e+07	0	0	0	0	#DIV/0!
Q5LJA5;Q5LJA9;Q9Y5K5;Q5LJB0;H0Y6Y4;H0Y4K0;H0Y636;H0Y4E0	Ubiquitin carboxyl-terminal hydrolase	UCHL5			8	6	2	4	2	3	0	3	1	2	1	2	4	2	3	0	3	1	2	1	40.423	0	14.902	5.4	13	6.8	10.1	0	11.5	2.3	4.2	2.3	177570000	290040000	32810000	1.66807e+08	255250000	0	103250000	119500000	0	68953000	38091000	3.56813e+07	3.34909
Q92890;C9IZG3;C9J6N9;C9JNP9	Ubiquitin recognition factor in ER-associated degradation protein 1	UFD1			4	3	0	1	0	1	0	0	0	1	0	0	1	0	1	0	0	0	1	0	34.5	0	11.79	0	4.2	0	3.3	0	0	0	3.3	0	0	117780000	0	39260000	80268000	0	0	26756000	0	0	0	0	#DIV/0!
Q96PU4;B1AL33	E3 ubiquitin-protein ligase UHRF2	UHRF2			2	5	3	2	1	2	1	1	0	1	1	3	2	1	2	1	1	0	1	1	89.984	0	8.2662	6.7	4	1.5	4	1.5	1.5	1.2	1.5	1.5	148370000	279320000	19097000	148929000	108310000	0	0	3.61033e+07	0	0	0	0	#DIV/0!
B1AKV4;F6UTR7;Q9NVA1;F8WCR2;B1AKV2;B1AKV6;B1AKV3	Ubiquinol-cytochrome-c reductase complex assembly factor 1	UQCC1			7	2	1	0	1	1	1	1	0	0	1	1	0	1	1	1	1	0	0	1	24.902	0.00063918	4.2123	5.5	0	5.5	5.5	8.2	5.5	0	0	5.5	257810000	0	167850000	1.41887e+08	253480000	98747000	142860000	165029000	0	0	143470000	4.78233e+07	3.45081
A0A7P0T9K1;Q70EL1;A0A7P0T9N2;R4GN32;H7C1E9	Inactive ubiquitin carboxyl-terminal hydrolase 54	USP54			5	3	1	0	1	1	0	3	0	0	0	1	0	1	1	0	3	0	0	0	182.22	0	18.399	1.2	0	1.2	1.2	0	2.6	0	0	0	84474000	0	291930000	125468000	77300000	0	167520000	8.16067e+07	0	0	0	0	#DIV/0!
Q8TAA9	Vang-like protein 1	VANGL1			1	3	2	2	3	1	1	2	1	1	1	2	2	3	1	1	2	1	1	1	59.974	0	44.231	5.7	5.7	9	3.1	3.1	5.7	2.7	3.1	3.1	196820000	157230000	426190000	260080000	115180000	31153000	225430000	123921000	67621000	73651000	0	4.70907e+07	2.63154
A0A140TA45;A0A140TA40;A0A0A0MTG1;A0A140T8Y0;A0A0G2JIA5;A0A140TA36;A0A140TA35;Q5ST30;B7ZL25;B4E0K6;A0A0G2JL52	Valyl-tRNA synthetase	VARS2			11	4	1	1	1	2	0	1	0	1	1	1	1	1	2	0	1	0	1	1	118.3	0	9.6183	0.9	0.9	0.9	2.3	0	1.7	0	0.9	0.9	0	0	23345000	7.78167e+06	166460000	0	50551000	72337000	0	0	0	0	#DIV/0!
P18206;A0A096LPE1	Vinculin	VCL	GOCC:0043296,GOCC:0005912,GOCC:0005915,GOCC:0030057,GOCC:0044291	Apical junction complex,Adherens junction,Zonula adherens,Desmosome,Cell-cell contact zone	2	35	2	15	28	1	4	15	5	9	7	2	15	28	1	4	15	5	9	7	123.8	0	145.7	3.2	21.5	27.6	1.9	5.7	15.9	8.3	12.6	8.4	246880000	2930500000	10280000000	4.48579e+09	132180000	393190000	10429000000	3.65146e+09	492640000	1244200000	655930000	797590000	4.57811
Q69YN4;H0YBN5	Protein virilizer homolog	VIRMA			2	4	2	0	2	3	0	0	1	0	0	2	0	2	3	0	0	1	0	0	202.02	0	30.144	1.5	0	1.4	2.4	0	0	0.7	0	0	99144000	0	68305000	5.58163e+07	154700000	0	0	5.15667e+07	48216000	0	0	16072000	3.20848
Q7Z7G8;H0YB72	Vacuolar protein sorting-associated protein 13B	VPS13B			2	20	1	1	18	1	0	7	0	0	0	1	1	18	1	0	7	0	0	0	448.66	0	70.031	0.4	0.4	6.7	0.4	0	2.3	0	0	0	174160000	103850000	2696900000	9.91637e+08	153480000	0	364830000	172770000	0	0	0	0	#DIV/0!
Q15906;A0A1W2PPT2	Vacuolar protein sorting-associated protein 72 homolog	VPS72			2	2	1	0	0	1	1	0	0	0	0	1	0	0	1	1	0	0	0	0	40.594	0.0012016	3.3105	3	0	0	3	6.9	0	0	0	0	83113000	0	0	2.77043e+07	152130000	72384000	0	74838000	0	0	0	0	#DIV/0!
A3KMH1	von Willebrand factor A domain-containing protein 8	VWA8			1	10	4	3	2	3	5	2	1	1	2	4	3	2	3	5	2	1	1	2	214.82	0	23.188	2.6	1.5	1.2	1.9	3.3	1.1	0.5	0.7	1.1	361450000	114900000	140480000	205610000	398520000	337030000	91191000	2.7558e+08	50581000	89849000	124190000	8.82067e+07	3.12426
A0A0A0MRT2;A0A7P0T961;Q9BTA9;J3QTA0	WW domain-containing adapter protein with coiled-coil	WAC			4	5	3	2	0	3	0	0	0	1	0	3	2	0	3	0	0	0	1	0	53.878	0	11.638	10.7	5.1	0	10.7	0	0	0	2.4	0	449570000	110160000	0	1.86577e+08	259760000	0	0	8.65867e+07	0	47479000	0	1.58263e+07	5.47105
A0A087X256;Q2M389;F8VNZ5;F8W1W1;F8VYH7	WASH complex subunit 4	WASHC4			5	4	0	1	1	0	1	0	1	1	0	0	1	1	0	1	0	1	1	0	136.5	0	5.6548	0	1.1	1	0	1.1	0	0.7	0.7	0	0	74576000	81537000	5.20377e+07	0	88989000	0	29663000	24776000	0	0	8.25867e+06	3.59174
A0A140T9L0;A0A0G2JJL1;H0Y6G3	WD repeat-containing protein 46	WDR46			3	2	1	0	2	1	0	2	0	0	2	1	0	1	1	0	1	0	0	1	35.759	0	23.625	6.8	0	12.1	6.8	0	12.1	0	0	12.1	79227000	0	306880000	1.28702e+08	88279000	0	350940000	1.46406e+08	0	0	161050000	5.36833e+07	2.72722
E9PDU5;A0A087X295;Q9NNW5	WD repeat-containing protein 6	WDR6			3	3	2	0	1	2	0	1	0	0	1	2	0	1	2	0	1	0	0	1	116.17	0	15.084	5	0	3.2	2.7	0	0.9	0	0	0.9	280070000	0	117940000	132670000	129170000	0	29707000	52959000	0	0	64210000	2.14033e+07	2.47433
Q5T750	Skin-specific protein 32	XP32			1	2	0	0	1	0	0	2	0	0	0	0	0	1	0	0	2	0	0	0	26.238	0.000612	3.537	0	0	4.8	0	0	8	0	0	0	0	0	136370000	4.54567e+07	0	0	183650000	6.12167e+07	0	0	0	0	#DIV/0!
Q5T6H7;Q9NQW7;Q5T6H3;Q5T6H2	Xaa-Pro aminopeptidase 1	XPNPEP1			4	2	2	0	2	1	1	0	0	0	1	2	0	2	1	1	0	0	0	1	62.138	0	8.1934	5.4	0	5.4	2.9	2.5	0	0	0	2.5	436030000	0	222230000	219420000	209590000	90594000	0	1.00061e+08	0	0	98020000	3.26733e+07	3.06248
D6RGY8;D6RFI3;E7EQR8;Q9GZM5;H0Y9A1	Protein YIPF3	YIPF3			5	2	0	0	1	1	0	1	0	0	0	0	0	1	1	0	1	0	0	0	12.29	0.0022851	2.6357	0	0	8.3	24.8	0	8.3	0	0	0	0	0	77837000	2.59457e+07	66964000	0	58029000	4.16643e+07	0	0	0	0	#DIV/0!
Q8N4Q0	Prostaglandin reductase 3	ZADH2			1	2	1	0	1	1	1	1	1	0	1	1	0	1	1	1	1	1	0	1	40.14	0.00032531	4.5511	4	0	4	4	2.4	4	4	0	2.4	243140000	0	217630000	153590000	289990000	0	182170000	1.57387e+08	109820000	0	37024000	48948000	3.21539
Q9ULJ3	Zinc finger and BTB domain-containing protein 21	ZBTB21			1	3	2	0	0	3	0	0	0	0	0	2	0	0	3	0	0	0	0	0	118.87	0	6.2986	3.8	0	0	5	0	0	0	0	0	236590000	0	0	7.88633e+07	366320000	0	0	1.22107e+08	0	0	0	0	#DIV/0!
Q9C0B5;H0YEF4	Palmitoyltransferase ZDHHC5	ZDHHC5			2	6	0	1	5	1	2	2	0	1	1	0	1	5	1	2	2	0	1	1	77.544	0	29.784	0	2.2	10.5	2.2	5.2	3.5	0	2.2	2.2	0	113260000	638640000	2.50633e+08	0	191020000	328210000	1.73077e+08	0	113410000	118010000	77140000	2.24367
Q9P0L1;A6NHJ4;G3V1M0;J3KR62;A0A7P0TAN4;A0A087WVZ7;Q9H963;Q8N782;Q8NCK3;Q9Y5A6;Q9NV72;Q96NL3;Q96N58;Q0VGE8;Q9UJW7;Q8N4W9;Q96IR2;Q05481	Zinc finger protein with KRAB and SCAN domains 7	ZKSCAN7			18	2	2	0	1	2	0	0	2	1	0	0	0	0	0	0	0	0	0	0	85.032	0	32.875	7.6	1.2	4	7.6	1.2	1.2	7.6	5.2	1.2	665250000	0	50496000	238582000	1060400000	0	0	3.53467e+08	168100000	16289000	0	61463000	5.75089
P17028	Zinc finger protein 24	ZNF24			1	5	3	1	0	2	2	0	1	0	0	3	1	0	2	2	0	1	0	0	42.155	0	9.8506	8.7	4.1	0	6.2	6.8	0	3.5	0	0	301090000	100720000	0	1.33937e+08	135800000	66668000	0	6.74893e+07	74678000	0	0	2.48927e+07	2.71121
Q96PM9;H0YIX3;F8VWV6;F8VSJ1;F8VQ24;F8VRY0;H0YI55	Zinc finger protein 385A	ZNF385A			7	6	6	2	0	3	1	0	0	2	1	6	2	0	3	1	0	0	2	1	40.453	0	14.616	18.4	7.5	0	7	2.8	0	0	5.4	2.1	312820000	137630000	0	150150000	172200000	69721000	0	8.06403e+07	0	62194000	25739000	29311000	2.7512
Q9C0F3	Zinc finger protein 436	ZNF436			1	2	1	0	0	1	0	0	0	0	0	1	0	0	1	0	0	0	0	0	54.276	0.00063674	4.1532	3.2	0	0	3.2	0	0	0	0	0	26805000	0	0	8935000	48591000	0	0	16197000	0	0	0	0	#DIV/0!
Q9UEG4	Zinc finger protein 629	ZNF629			1	3	2	0	0	1	1	0	0	0	0	1	0	0	1	1	0	0	0	0	96.619	0	5.6166	6.7	4.1	0	5.6	5.6	4.1	4.1	4.1	4.1	33410000	0	0	1.11367e+07	77289000	43365000	0	40218000	0	0	0	0	#DIV/0!
Q9H582;A0A087WZL9	Zinc finger protein 644	ZNF644			2	5	4	0	2	5	0	1	2	0	1	4	0	2	5	0	1	2	0	1	149.56	0	35.812	4.4	0	2.5	5.7	0	1.4	2.5	0	1.4	528440000	0	129230000	2.19223e+08	824830000	0	109580000	311470000	0	0	60188000	2.00627e+07	15.5249
H0YEB6;O60232;E9PK41;H0YEK1;G3V1B8	Protein ZNRD2	ZNRD2			5	2	0	1	0	0	1	0	0	0	0	0	1	0	0	1	0	0	0	0	20.916	0.0091373	2.0398	0	4.1	0	0	18.7	0	0	0	0	0	90479000	0	3.01597e+07	0	95719000	0	3.19063e+07	0	0	0	0	#DIV/0!
E-cadherin-TurboID unique proteins
A0A7P0T8J7;A2A2Q9;A0A7P0TA70;Q9Y312	Protein AAR2 homolog	AAR2			4	2	1	2	0	0	0	0	0	0	0	1	2	0	0	0	0	0	0	0	37.375	0	15.746	6.1	12.2	0	0	0	0	0	0	0	148220000	243920000	0	1.30713e+08	0	0	0	0	0	0	0	0	#DIV/0!
Q96IU4;B4DQI4;F8W9U3	Protein ABHD14B	ABHD14B			3	3	1	1	1	0	2	1	0	1	0	1	1	1	0	2	1	0	1	0	22.345	0	9.413	6.2	10.5	6.2	0	12.9	6.2	0	10.5	0	67532000	188440000	0	85324000	0	68969000	0	2.29897e+07	0	123780000	0	41260000	0.55719
A0A0U1RQT1;A0A087X1H5;Q15057;H7C3K3;H7C3Q8	Arf-GAP with coiled-coil, ANK repeat and PH domain-containing protein 2	ACAP2			5	2	1	1	0	0	0	0	0	1	1	1	1	0	0	0	0	0	1	1	62.841	0.00090882	3.3869	2.4	2.4	0	0	0	0	0	2	2.4	50095000	51897000	0	3.39973e+07	0	0	0	0	0	0	49848000	16616000	0
P21399	Cytoplasmic aconitate hydratase	ACO1			1	9	2	3	5	1	4	4	1	2	3	2	3	5	1	4	4	1	2	3	98.398	0	18.888	2.5	4.6	6.5	0.9	4.6	4.7	0.9	2.5	3.9	100930000	170290000	1022700000	4.31307e+08	30853000	206510000	262760000	1.66708e+08	34867000	92838000	174460000	1.00722e+08	1.65513
A0A7I2V5A1;A0A7I2V5T4;A2A274;Q99798;A0A7I2V3U0;A0A7I2V586;A0A7I2V3F1;A0A7I2V614;A0A7I2V538;A0A7I2V6A6;A0A7I2V4I8;A0A7I2V5W7;A0A7I2V3C8;A0A7I2V3U7;A0A7I2V5U4;A0A7I2V2Y4	Aconitate hydratase, mitochondrial	ACO2			16	16	8	3	1	8	4	5	10	2	2	8	3	1	8	4	5	10	2	2	78.46	0	118.5	13.7	6.3	2.4	15.2	8.9	10.1	21.9	4.2	3.9	5584100000	312910000	82037000	1.99302e+09	2056200000	273930000	443160000	924430000	1811000000	183840000	255040000	749960000	1.23264
Q8WXI4	Acyl-coenzyme A thioesterase 11	ACOT11			1	4	1	2	1	1	2	2	1	2	1	1	2	1	1	2	2	1	2	1	68.491	0	36.994	1.6	3	1.6	1.6	3.3	3.6	3.8	3	1.6	451340000	134690000	196900000	2.60977e+08	172610000	88720000	206820000	156050000	126700000	107210000	140410000	1.24773e+08	1.25067
E7EV99;E7ENY0;P35611;H0Y9H2;A0A0A0MSR2;H0YFD8;P35612	Alpha-adducin	ADD1			7	9	3	4	5	1	1	1	0	1	4	3	4	5	1	1	1	0	1	4	70.055	0	40.534	6	8.7	11.1	2.8	2.5	2.5	0	1.9	8.5	328100000	364860000	1172100000	6.21687e+08	86580000	0	103560000	63380000	0	139640000	629650000	256430000	0.247163
P11766;D6RFE4;H0YAG8;D6RAY0;D6R9G2	Alcohol dehydrogenase class-3	ADH5			5	3	2	3	0	2	0	0	1	1	0	2	3	0	2	0	0	1	1	0	39.724	0	6.0775	7.2	14.4	0	7.2	0	0	4.5	2.7	0	394220000	555890000	0	3.16703e+08	336820000	0	0	1.12273e+08	159780000	79864000	0	7.98813e+07	1.4055
A0A087X044;A0A087X1U1;F5GXM9;E7EUN2;Q9UPQ3;C9J8Z2;A0A0U1RRF1;H7C4F1;C9J975;E7ESL9;Q96P47	Arf-GAP with GTPase, ANK repeat and PH domain-containing protein 1	AGAP1			11	4	2	0	3	1	0	0	1	0	0	2	0	3	1	0	0	1	0	0	38.134	0	29.719	9.4	0	14	6.3	0	0	4	0	0	191780000	0	183530000	1.25103e+08	66547000	0	0	2.21823e+07	186780000	0	0	62260000	0.356285
C9J069	Apical junction component 1 homolog	AJM1			1	2	2	1	0	0	0	0	1	0	0	2	1	0	0	0	0	1	0	0	106.65	0.0030847	2.4427	2.5	0.9	0	0	0	0	0.9	0	0	128400000	80799000	0	69733000	0	0	0	0	64947000	0	0	21649000	0
Q96IF1;H0YJL9	LIM domain-containing protein ajuba	AJUBA			2	2	0	0	1	0	0	1	0	0	0	0	0	1	0	0	1	0	0	0	56.933	0.0068064	2.1614	0	0	1.9	0	1.5	1.5	0	0	0	0	0	71647000	2.38823e+07	0	0	0	0	0	0	0	0	#DIV/0!
Q02040;X6RAJ1	A-kinase anchor protein 17A	AKAP17A			2	3	1	1	1	1	0	1	1	0	1	1	1	1	1	0	1	1	0	1	80.735	0	13.928	1.3	4	1.3	1.3	0	1.3	1.4	0	1.3	33937000	129010000	35962000	66303000	41105000	0	43530000	2.82117e+07	11044000	0	36358000	1.58007e+07	1.78547
A0A7P0T939;A0A7P0TAD6;A0A7P0TAX3;A0A7P0Z4Q5;A0A7P0T8N5;A0A7P0T928;A0A7P0Z4N5;A0A7P0TBI4;A0A7P0TBH8;A0A0A0MRF6;Q99996;A0A7P0T9A9;A0A7P0TAA2;A0A2R8Y590;A0A7P0TAJ1;H7BYL6;A0A7P0T9E2	A-kinase anchor protein 9	AKAP9			17	30	16	7	11	16	8	9	2	7	9	16	7	11	16	8	9	2	7	9	437.8	0	178.47	5.8	2.5	3.6	5.6	2.4	3.2	0.7	2.5	2.8	1559700000	730620000	676320000	988880000	1264300000	434060000	549410000	7.49257e+08	244530000	558710000	475030000	426090000	1.75845
J3QRD1;A0A5F9ZHI5;A0A5F9ZHN9;P51648;A0A5K1VW72;A0A5F9ZI12;A0A5F9ZGX4;J3QS00;I3L1M4;A0A5F9ZHZ9;J3QKK9;K7EN73;J3KTG1;E9PJV0;I3L0X1;C9JKT2;C9JMC5;I3L3I9;A8MYB8;E9PNN6;P48448;P30838	Aldehyde dehydrogenase family 3 member A2	ALDH3A2			22	5	1	2	0	0	1	1	2	1	0	1	2	0	0	0	1	2	1	0	44.648	0	6.037	3.1	6.4	0	0	3.1	2.3	6.6	6.4	0	57564000	277370000	0	1.11645e+08	0	70725000	97378000	5.60343e+07	27536000	136840000	0	54792000	1.02267
Q9P2R3;I3L3P8;K7EPT2	Rabankyrin-5	ANKFY1			3	12	5	7	4	6	2	4	4	5	5	5	7	4	6	2	4	4	5	5	128.4	0	137.69	5.7	10.7	3.7	7.2	1.7	4.6	6	7.9	5.6	580240000	3268200000	445450000	1.4313e+09	856310000	117820000	447440000	4.73857e+08	345680000	537220000	395130000	426010000	1.11231
Q6AI12	Ankyrin repeat domain-containing protein 40	ANKRD40			1	2	1	1	2	0	0	0	0	0	0	1	1	2	0	0	0	0	0	0	41.088	0.00032279	4.4558	5.2	3.5	8.7	0	0	0	0	0	0	63638000	54123000	71769000	6.31767e+07	0	0	0	0	0	0	0	0	#DIV/0!
P50995;H0Y6E1	Annexin A11	ANXA11			2	3	0	3	0	0	0	0	0	0	0	0	3	0	0	0	0	0	0	0	54.389	0.00091158	3.4351	0	5.3	0	0	0	0	0	0	0	0	324040000	0	1.08013e+08	0	0	0	0	0	0	0	0	#DIV/0!
Q10567;C9J1E7	AP-1 complex subunit beta-1	AP1B1			2	6	0	3	4	0	1	3	0	2	2	0	3	4	0	1	3	0	2	2	104.64	0	17.825	3.3	9.1	17.2	3.3	6.5	14.8	4.6	10	13.7	0	445210000	341850000	2.62353e+08	0	112540000	295830000	1.36123e+08	0	314560000	66727000	1.27096e+08	1.07103
A0A2R8YGH5;H7C1E4;P61966	AP-1 complex subunit sigma-1	AP1S1			3	3	1	3	0	0	0	0	0	1	0	1	3	0	0	0	0	0	1	0	18.602	0	19.547	10.2	22.3	0	0	0	0	0	10.2	0	0	185820000	0	61940000	0	0	0	0	0	0	0	0	#DIV/0!
Q9Y2T2;E5RJ52;P53677;H0YBM0;H0YBA0;E7ER80	AP-3 complex subunit mu-1	AP3M1			6	9	3	7	5	3	3	3	3	4	2	3	7	5	3	3	3	3	4	2	46.939	0	58.948	10.3	23.7	13.4	10.3	7.7	8.1	10.3	12.7	4.8	318350000	679890000	989360000	6.62533e+08	266170000	228230000	409270000	3.01223e+08	245990000	455330000	203560000	3.01627e+08	0.998663
Q68EM7;C9IZD3;I3L4P0;I3L4P6;I3L1S9	Rho GTPase-activating protein 17	ARHGAP17			5	4	0	1	0	0	1	0	0	2	0	0	1	0	0	1	0	0	2	0	95.436	0.00091296	3.4631	0	2.8	0	0	0.8	0	0	2	0	0	141330000	0	47110000	0	5049600	0	1683200	0	58036000	0	1.93453e+07	0.0870081
Q5VV41	Rho guanine nucleotide exchange factor 16	ARHGEF16			1	3	1	0	2	1	0	0	0	0	1	1	0	2	1	0	0	0	0	1	80.104	0.00033146	4.8648	1.3	0	3.9	1.3	0	0	0	0	2	63766000	0	113640000	5.91353e+07	54003000	0	0	18001000	0	0	51099000	17033000	1.05683
H3BNB9;Q9Y4X5;H3BSK4	E3 ubiquitin-protein ligase ARIH1	ARIH1			3	2	1	0	1	0	0	0	0	0	1	1	0	1	0	0	0	0	0	1	22.216	0	5.5567	4.9	0	6.9	0	0	0	0	0	6.9	81360000	0	105880000	6.24133e+07	0	0	0	0	0	0	59762000	1.99207e+07	0
F5GYV5;H7BZV4;A0A0C4DG62;F8WCT1;Q66PJ3;F8WEP2;A0A0C4DH18;F5H7X4	ADP-ribosylation factor-like protein 6-interacting protein 4	ARL6IP4			8	3	0	2	1	0	1	1	0	1	1	0	2	1	0	1	1	0	1	1	23.687	0	33.348	0	15.6	7.6	0	7.6	7.6	0	7.1	7.6	0	174560000	116070000	9.68767e+07	0	29952000	81091000	3.70143e+07	0	47077000	38017000	2.83647e+07	1.30495
Q9H993;F5GZY1	Damage-control phosphatase ARMT1	ARMT1			2	3	0	1	2	0	0	0	0	1	0	0	1	2	0	0	0	0	1	0	51.172	0.0022844	2.6356	0	3.9	5.9	0	0	0	0	3.9	0	0	189520000	115540000	1.01687e+08	0	0	0	0	0	84498000	0	28166000	0
P59998;F8WCF6;F8WDD7;A0A0A6YYG9;H7C0A3;F8WE39;R4GN08;F8WDW3	Actin-related protein 2/3 complex subunit 4	ARPC4			8	6	4	2	3	4	0	2	0	3	2	4	2	3	4	0	2	0	3	2	19.667	0	9.15	22	11.3	16.1	16.1	0	11.3	0	16.7	11.3	629170000	306490000	567430000	501030000	501430000	0	246670000	2.49367e+08	0	369570000	363500000	2.44357e+08	1.0205
E7EVC7;Q676U5;C9J8C6;C9J1B2	Autophagy-related protein 16-1	ATG16L1			4	3	0	1	0	0	1	0	0	1	0	0	1	0	0	1	0	0	1	0	70.01	0.00062676	3.8772	0	2.1	0	0	1.3	0	0	3	0	0	289110000	0	96370000	0	15588000	0	5196000	0	53391000	0	17797000	0.291959
Q9NT62;F8WDI0	Ubiquitin-like-conjugating enzyme ATG3	ATG3			2	2	0	1	1	1	0	0	0	1	1	0	1	1	1	0	0	0	1	1	35.864	0.0041713	2.3288	0	4.1	4.1	4.1	0	0	0	4.1	2.2	0	101090000	112770000	7.12867e+07	25738000	0	0	8.57933e+06	0	69065000	22874000	3.06463e+07	0.279946
E9PIN0;A0A6Q8PH76;Q13315;H0YDU7	Serine-protein kinase ATM	ATM			4	2	0	1	0	1	0	0	0	0	0	0	1	0	1	0	0	0	0	0	176.91	0.0030916	2.4632	0	0.5	0	0.5	0	0	0	0	0	0	21773000	0	7.25767e+06	0	0	0	0	0	0	0	0	#DIV/0!
B1AKY9;P50993	Sodium/potassium-transporting ATPase subunit alpha-2	ATP1A2			2	2	1	1	0	0	1	0	0	1	0	1	1	0	0	1	0	0	1	0	110.86	0.00061387	3.5869	15.3	13.6	14.4	16.7	15.3	16.7	15.1	14.5	14.4	843510000	137530000	0	3.27013e+08	0	63087000	0	21029000	0	91639000	0	3.05463e+07	0.68843
Q9Y6H3	Mitochondrial inner membrane protease ATP23 homolog	ATP23			1	2	1	1	0	0	0	0	0	0	0	1	1	0	0	0	0	0	0	0	28.08	0	5.0475	6.5	4.5	0	0	0	0	0	0	0	57699000	349780000	0	1.35826e+08	0	0	0	0	0	0	0	0	#DIV/0!
P56134;C9JU26	ATP synthase subunit f, mitochondrial	ATP5MF			2	3	2	2	2	2	2	2	2	3	2	2	2	2	2	2	2	2	3	2	10.918	0	33.743	42.6	28.7	30.9	42.6	42.6	42.6	42.6	52.1	42.6	1548300000	274250000	351720000	7.24757e+08	539150000	36708000	375470000	3.17109e+08	396580000	416220000	236980000	3.49927e+08	0.906217
P21281;H0YC04;C9JL73;P15313;E5RGH6;C9JNS9;H0YAT8	V-type proton ATPase subunit B, brain isoform	ATP6V1B2			7	11	5	6	4	5	5	2	2	4	1	5	6	4	5	5	2	2	4	1	56.5	0	42.738	14.3	17.4	11.9	15.9	13.3	4.7	5.3	12.5	2.7	970030000	1009400000	568640000	8.49357e+08	1001300000	312420000	79305000	4.64342e+08	134520000	740490000	101390000	3.25467e+08	1.4267
Q04656	Copper-transporting ATPase 1	ATP7A			1	2	0	0	1	0	0	0	1	0	0	0	0	1	0	0	0	1	0	0	163.37	0.0068325	2.1909	0	0	0.9	0	0	0	0.7	0	0	0	0	359820000	119940000	0	0	0	0	0	0	0	0	#DIV/0!
Q9UBB4;A0A1W2PQD2;B1AHE4;B1AHE3	Ataxin-10	ATXN10			4	14	3	11	7	2	7	5	1	2	6	3	11	7	2	7	5	1	2	6	53.488	0	142.09	8.6	34.3	19.6	5.1	18.7	14.9	1.5	5.1	17.5	279930000	2924700000	1127200000	1.44394e+09	183080000	606420000	982360000	590620000	28522000	75459000	994710000	3.6623e+08	1.6127
H0YH87;F8W0B5;A0A2R8Y7P6;A0A2R8YDM9;A0A5F9ZHH4;F8VQP2;F8WB06;V9GY86;A0A5F9ZI57;A0A2R8Y7E6;A0A2R8Y5A6;A0A5F9ZHX3;A0A5F9ZHW5;Q99700;F8VRK6;A0A5F9ZH85	Ataxin-2	ATXN2			16	6	3	6	1	2	4	1	2	3	0	3	6	1	2	4	1	2	3	0	90.166	0	94.651	5.1	10.4	2	3.8	7.2	2	3.4	5.4	0	216820000	967610000	36800000	4.07077e+08	221280000	249690000	20958000	163976000	209700000	390260000	0	1.99987e+08	0.819935
P61769;H0YLF3;F5H6I0	Beta-2-microglobulin	B2M			3	2	0	2	1	1	2	0	0	1	1	0	2	1	1	2	0	0	1	1	13.714	0	9.6964	0	26.9	8.4	8.4	26.9	0	0	18.5	8.4	0	493370000	412940000	3.02103e+08	330850000	294670000	0	2.08507e+08	0	124620000	292860000	139160000	1.49832
I3L4C2;Q9UQB8;I3L1C8;I3L2M4;B4DWA1;I3L4A3;I3L125;I3L327;I3L2J6;I3L113;I3L526;I3L0Y9;I3L0M4;I3L3J7;I3L3C6	Brain-specific angiogenesis inhibitor 1-associated protein 2	BAIAP2			15	4	0	4	0	0	1	0	0	2	1	0	4	0	0	1	0	0	2	1	61.381	0	8.6825	0	10.7	0	0	1.3	0	0	3.6	1.3	0	533300000	0	1.77767e+08	0	62326000	0	2.07753e+07	0	219150000	36915000	85355000	0.243399
H0Y542;G3XAF7;O75363;H7C1E7	Breast carcinoma-amplified sequence 1	BCAS1			4	3	0	0	3	0	0	0	0	0	0	0	0	3	0	0	0	0	0	0	51.104	0	8.5852	0	0	8.6	0	0	0	0	0	0	0	0	154400000	5.14667e+07	0	0	0	0	0	0	0	0	#DIV/0!
P55957	BH3-interacting domain death agonist	BID			1	2	0	2	0	0	0	0	0	0	0	0	2	0	0	0	0	0	0	0	21.994	0.0003308	4.8364	0	20	0	0	0	0	0	0	0	0	91120000	0	3.03733e+07	0	0	0	0	0	0	0	0	#DIV/0!
A0A0A0MTH9;O14981	TATA-binding protein-associated factor 172	BTAF1			2	4	0	2	2	0	1	0	0	1	0	0	2	2	0	1	0	0	1	0	206.93	0	8.6329	0	1.2	1.5	0	0.9	0	0	0.4	0	0	114080000	111340000	75140000	0	67445000	0	2.24817e+07	0	47940000	0	15980000	1.40686
P20290;A0A7I2YQL2;A0A7I2V3T6;A0A7I2V5Y3;H0Y9Y1;D6RDG3	Transcription factor BTF3	BTF3			6	4	0	4	0	0	0	0	0	1	0	0	4	0	0	0	0	0	1	0	22.168	0	41.135	0	48.5	0	0	0	0	0	11.2	0	0	588770000	0	1.96257e+08	0	0	0	0	0	108000000	0	36000000	0
Q9UNZ5;K7ESE5;A0A0A0MQS3	Leydig cell tumor 10 kDa protein homolog	C19orf53			3	2	0	2	0	0	0	0	0	0	0	0	2	0	0	0	0	0	0	0	10.576	0.0012063	3.3544	0	18.2	0	0	0	0	0	0	0	0	236130000	0	78710000	0	0	0	0	0	0	0	0	#DIV/0!
P01024;M0QXZ3;M0QYC8	Complement C3	C3			3	15	11	3	2	4	5	1	2	2	0	10	3	2	4	5	1	2	2	0	187.15	0	58.963	9	3.1	1.9	3.1	3.1	0.8	1.8	1.9	0	1648100000	404870000	64005000	7.05658e+08	546730000	298950000	49319000	298333000	174830000	292250000	0	1.55693e+08	1.91616
Q9Y6W3;F8WCZ1;F8WDQ3;H7C0F1;H7C1B7	Calpain-7	CAPN7			5	9	2	6	2	1	1	3	1	3	2	2	6	2	1	1	3	1	3	2	92.651	0	34.996	3	9.2	2.5	1.4	2	5.2	1.1	4.3	3	571350000	703220000	238080000	5.04217e+08	47836000	67568000	174730000	9.67113e+07	46686000	362770000	105330000	1.71595e+08	0.563601
Q5RIB5;Q5JTY2;A0A087WTC0;Q6NVZ8;F8WEG4;A0A0B4J2E3;A0A087WZQ3;F8WEU0;E7EUZ7;A0A087WYD2;F2Z2T4;A0A087X140;A0A087WWG3;A0A0A6YYH9;Q5RIB0;H0Y5V3;C9J3G2;A0A0A0MRU4;Q9BRT8;Q8IUF1;Q5RIA9;Q5JTY5;Q4V339;A0A0B4J1T6;A0A087X1C0;A0A0B4J2F1	COBW domain-containing protein 3	CBWD3			26	2	0	2	0	0	0	0	0	0	0	0	2	0	0	0	0	0	0	0	12.139	0.00062539	3.8452	0	25.7	0	0	0	0	0	0	0	0	727410000	0	242470000	0	0	0	0	0	0	0	0	#DIV/0!
Q9HC52;C9JM54;C9J6K3	Chromobox protein homolog 8	CBX8			3	5	5	1	3	3	2	2	3	1	1	5	1	3	3	2	2	3	1	1	43.395	0	78.306	18.8	4.9	10.8	9.5	7.2	10.5	12.9	4.9	4.9	1063600000	98296000	284780000	4.82225e+08	802550000	139920000	139030000	360500000	295430000	128650000	140570000	1.88217e+08	1.91535
O60826	Coiled-coil domain-containing protein 22	CCDC22			1	3	0	2	1	0	1	0	0	1	0	0	2	1	0	1	0	0	1	0	70.755	0	12.643	0	5.1	3.3	0	2.1	0	0	3.3	0	0	235120000	171470000	135530000	0	27856000	0	9.28533e+06	0	52626000	0	17542000	0.52932
Q8IVM0	Coiled-coil domain-containing protein 50	CCDC50			1	2	2	1	1	2	0	0	1	1	0	2	1	1	2	0	0	1	1	0	35.822	0	10.476	8.5	4.6	3.9	8.5	0	0	4.6	4.6	0	173640000	81099000	49229000	1.01323e+08	157680000	0	0	52560000	47173000	101900000	0	49691000	1.05774
Q9H6F5	Coiled-coil domain-containing protein 86	CCDC86			1	2	0	2	0	0	0	0	0	1	0	0	2	0	0	0	0	0	1	0	40.235	0.00063291	4.0418	0	5.8	0	0	0	0	0	3.3	0	0	167100000	0	55700000	0	0	0	0	0	70367000	0	2.34557e+07	0
Q9UJX2	Cell division cycle protein 23 homolog	CDC23			1	6	2	2	0	1	1	1	1	0	2	2	2	0	1	1	1	1	0	2	68.833	0	21.382	6.7	6.2	0	4.9	2.8	2	1.3	0	3.7	156200000	352050000	0	1.69417e+08	183140000	81271000	39133000	1.01181e+08	161000000	0	31570000	64190000	1.57628
Q9H3Q1;J3QQS6;J3KRZ9;J3QR93	Cdc42 effector protein 4	CDC42EP4			4	3	0	1	1	0	2	0	0	0	1	0	1	1	0	2	0	0	0	1	37.979	0	9.0646	0	8.1	3.9	0	11	0	0	0	3.9	0	186650000	154550000	1.13733e+08	0	135370000	0	4.51233e+07	0	0	127630000	4.25433e+07	1.06064
D6REX9;A0A6Q8PF83;A0A6Q8PH95;A0A6Q8PGD1;Q8N960	Centrosomal protein of 120 kDa	CEP120			5	2	1	0	1	0	0	0	0	0	1	1	0	1	0	0	0	0	0	1	95.929	0.0057899	2.2545	0.9	0	0.8	0	0	0	0	0	0.8	271030000	0	325310000	198780000	0	0	0	0	0	0	0	0	#DIV/0!
I3L2J8;Q9UPN4;I3L2X7;I3L316;I3L4M5	Centrosomal protein of 131 kDa	CEP131			5	4	2	1	2	3	1	0	2	1	1	2	1	2	3	1	0	2	1	1	117.7	0	40.107	3.2	1.5	2.8	4.3	1.7	0	2.6	1.5	1.7	426660000	68195000	171160000	222005000	481370000	0	0	1.60457e+08	147290000	60313000	90146000	9.92497e+07	1.6167
Q53EZ4;H0Y432	Centrosomal protein of 55 kDa	CEP55			2	3	1	3	0	0	0	0	0	0	0	1	3	0	0	0	0	0	0	0	54.178	0	13.819	3.2	9.7	0	0	0	0	0	0	0	86004000	294300000	0	126768000	0	0	0	0	0	0	0	0	#DIV/0!
Q6P2H3;H7BZW2	Centrosomal protein of 85 kDa	CEP85			2	2	1	0	0	0	0	0	0	1	0	1	0	0	0	0	0	0	1	0	85.638	0	15.608	3.1	0	0	0	0	0	0	2.1	0	90438000	0	0	30146000	0	0	0	0	0	31807000	0	1.06023e+07	0
C9J0A7;Q9UQN3;A0A087WW88	Charged multivesicular body protein 2b	CHMP2B			3	2	1	1	0	0	0	0	0	0	0	1	1	0	0	0	0	0	0	0	20.772	0.003351	2.3917	6	4.4	0	0	0	0	0	0	0	154330000	32594000	0	62308000	0	0	0	0	0	0	0	0	#DIV/0!
O76071	Probable cytosolic iron-sulfur protein assembly protein CIAO1	CIAO1			1	5	2	2	3	3	2	1	1	1	1	2	2	3	3	2	1	1	1	1	37.84	0	23.731	6.2	8.6	13.9	11.8	6.2	3.5	2.7	5.9	3.5	130140000	114300000	286420000	1.76953e+08	211110000	107760000	56059000	1.24976e+08	39296000	78564000	69971000	6.26103e+07	1.9961
H0Y5T1;F8WA11;Q7Z460	CLIP-associating protein 1	CLASP1			3	2	0	1	0	0	0	0	0	1	0	0	1	0	0	0	0	0	1	0	139.93	0	10.186	2.4	3.5	0	2.4	2.4	1.5	0	3.6	2.4	0	480510000	0	160170000	0	0	0	0	0	13670000	0	4.55667e+06	0
E9PL17;Q92989;E9PKV5;E9PJM4	Polyribonucleotide 5-hydroxyl-kinase Clp1	CLP1			4	6	1	2	1	2	0	1	1	1	0	1	2	1	2	0	1	1	1	0	48.939	0	23.127	5.3	6	1.8	6	0	1.8	1.8	1.8	0	112360000	398320000	70543000	193741000	383140000	0	0	1.27713e+08	109700000	118900000	0	76200000	1.67603
A0A494C0R8;K7EIG1;I3L2B0;O75153;I3L318;I3L4B5;Q9Y5I4	Clustered mitochondria protein homolog	CLUH			7	25	5	14	10	3	6	5	4	11	8	5	14	10	3	6	5	4	11	8	150.46	0	147.88	4.8	15.8	9.7	2.3	5.7	4.2	4.4	11.7	7.6	664700000	3872500000	1279100000	1.93877e+09	389270000	475510000	699910000	5.21563e+08	435480000	1408600000	954410000	932830000	0.559119
Q96KP4;J3QQN6;J3QR27;J3QLU1;J3QKQ0;J3QRD0;J3QL02;J3KSV5;A0A087WYZ1;J3QKT2;J3KSS4;J3KRD5;J3QRP4;A0A087WVS2;J3QRA8	Cytosolic non-specific dipeptidase	CNDP2			15	3	2	0	1	1	0	0	1	0	1	2	0	1	1	0	0	1	0	1	52.878	0.00032776	4.6731	5.3	0	1.7	3.6	0	0	3.8	0	1.7	260010000	0	42794000	1.00935e+08	120330000	0	0	40110000	69029000	0	62720000	4.39163e+07	0.913328
Q9UIV1;H0YBT3;H0YAV9	CCR4-NOT transcription complex subunit 7	CNOT7			3	3	0	2	1	0	1	0	0	1	0	0	2	1	0	1	0	0	1	0	32.745	0	23.152	0	13	3.5	0	7	0	0	6	0	0	348060000	47620000	1.31893e+08	0	101670000	0	33890000	0	65541000	0	21847000	1.55124
A0A0X1KG75;A0A0D9SG04;Q53SF7;A0A0B4J1Z0	Cordon-bleu protein-like 1	COBLL1			4	3	1	1	1	0	0	0	0	1	0	1	1	1	0	0	0	0	1	0	128.61	0.00032123	4.3239	1	1.2	1	0	0	0	0	0.9	0	20264000	127000000	20726000	5.59967e+07	0	0	0	0	0	7167200	0	2.38907e+06	0
Q96JB2	Conserved oligomeric Golgi complex subunit 3	COG3			1	2	0	2	0	0	0	0	0	0	0	0	2	0	0	0	0	0	0	0	94.095	0.0076004	2.1417	0	3.1	0	0	0	0	0	0	0	0	114950000	0	3.83167e+07	0	0	0	0	0	0	0	0	#DIV/0!
D6RAX7;D6RFN0;Q9BT78;D6RD63	COP9 signalosome complex subunit 4	COPS4			4	4	0	3	0	0	1	1	0	1	1	0	3	0	0	1	1	0	1	1	47.726	0	7.4239	0	9.8	0	0	2.4	3.8	0	2.4	3.8	0	170310000	0	56770000	0	42391000	64204000	3.55317e+07	0	27994000	50275000	2.60897e+07	1.36191
Q9UKF6;G5E9W3;C9JZH6	Cleavage and polyadenylation specificity factor subunit 3	CPSF3			3	9	2	0	3	2	1	2	5	1	4	2	0	3	2	1	2	5	1	4	77.485	0	18.799	5	0	6.3	4.8	1.5	3.1	10.7	3.5	5.6	689790000	0	1456700000	7.15497e+08	960520000	0	169390000	3.76637e+08	367390000	108820000	374180000	2.83463e+08	1.3287
H7BYT1;P48730;H0Y2N6;J3QQI9;B0QY36;H0Y645;B0QY35;B0QY34;A0A669KBC0;P49674	Casein kinase I isoform delta	CSNK1D			10	2	0	2	0	0	1	0	0	1	0	0	2	0	0	1	0	0	1	0	49.064	0.0014815	3.0855	0	5.9	0	0	3.3	0	0	2.6	0	0	659090000	0	2.19697e+08	0	20421000	0	6807000	0	115010000	0	3.83367e+07	0.177558
P56545;A0A087WYL1;Q13363;H0Y9M9;E7ESU7;H0Y8U5;D6RAX2;E7EPF8;H0Y8W7	C-terminal-binding protein 2	CTBP2			9	7	4	2	3	3	2	3	4	2	2	4	2	3	3	2	3	4	2	2	48.944	0	20.612	11.5	6.7	10.1	9	4.7	10.1	9.2	4.7	4.3	614980000	292500000	321920000	409800000	709690000	96584000	371380000	3.92551e+08	462590000	16627000	118890000	199369000	1.96897
A0A7I2YQT5;A0A7I2V6E3;A0A7I2V466;A0A7I2V2Q8;P53634;A0A7I2V5C5;H0YCY8	Cathepsin C	CTSC			7	2	1	0	0	1	0	0	0	0	0	1	0	0	1	0	0	0	0	0	38.535	0.00061218	3.5373	3.5	0	0	5.8	0	0	0	0	0	64513000	0	0	2.15043e+07	129710000	0	0	4.32367e+07	0	0	0	0	#DIV/0!
A0A0A0MTN0;Q13617;Q5T2B5	Cullin-2	CUL2			3	2	0	1	0	0	1	0	0	1	0	0	1	0	0	1	0	0	1	0	88.505	0.00064041	4.2668	0	1.3	0	0	1.3	0	0	1.7	0	0	23769000	0	7923000	0	0	0	0	0	0	0	0	#DIV/0!
J3KRR7;Q9NQC7;H3BS09	Deubiquitinating enzyme CYLD	CYLD			3	3	0	0	3	0	0	0	0	0	0	0	0	3	0	0	0	0	0	0	101.9	0	6.8275	0	0	3.8	0	0	0	0	0	0	0	0	340780000	1.13593e+08	0	0	0	0	0	0	0	0	#DIV/0!
E7ET49;Q8NCG7	Diacylglycerol lipase-beta	DAGLB			2	4	2	0	2	0	1	1	0	0	1	2	0	2	0	1	1	0	0	1	68.951	0	8.0025	4.4	0	4.3	0	2.9	2.9	0	0	2.9	130570000	0	170490000	1.00353e+08	0	55681000	55687000	3.71227e+07	0	0	57287000	1.90957e+07	1.94404
D6RCP9;D6RFG8;P27707;D6RG38	Deoxycytidine kinase	DCK			4	4	2	2	2	2	1	1	2	2	0	2	2	2	2	1	1	2	2	0	22.891	0	13.108	11.6	11.6	14.1	11.6	6.5	4	11.6	11.6	0	192470000	245360000	274820000	237550000	163720000	33850000	101070000	9.95467e+07	165690000	182680000	0	1.16123e+08	0.857249
A8K8J9;F8W1I6;A0A7I2V4Y9;A0A7I2V4H4;Q13561;H0YHL1;H0YI98;F8VW18;A0A7I2V390	Dynactin subunit 2	DCTN2			9	2	0	0	2	0	0	0	1	0	1	0	0	2	0	0	0	1	0	1	34.486	0	7.6199	0	0	10.8	0	0	0	4.8	0	4.8	0	0	80729000	2.69097e+07	0	0	0	0	0	0	0	0	#DIV/0!
Q9BTE1;H3BUD2;H3BS05;H3BR94	Dynactin subunit 5	DCTN5			4	2	1	0	2	0	0	0	0	0	1	1	0	2	0	0	0	0	0	1	20.126	0.00062073	3.7719	3.8	0	12.1	0	0	0	0	0	3.8	22138000	0	221750000	81296000	0	0	0	0	0	0	21512000	7.17067e+06	0
G3V529;Q9GZR7;A0A1W2PRR2;F5GYL3;A0A087WXU8	ATP-dependent RNA helicase DDX24	DDX24			5	3	2	0	1	0	0	0	1	0	0	2	0	1	0	0	0	1	0	0	91.48	0	7.7365	4.4	0	2.1	0	0	0	1.6	0	0	122230000	0	40274000	54168000	0	0	0	0	47894000	0	0	1.59647e+07	0
P23743;G3V4E1;F8VWX8;G3V4I3;F8VNZ9;G3V312;G3V327;C9JM35;F8W1M3;F8W1H7;H0YJH4	Diacylglycerol kinase alpha	DGKA			11	5	2	2	3	0	0	1	0	1	3	2	2	3	0	0	1	0	1	3	82.629	0	10.077	3	3.8	4.2	0	0	1.2	0	2	4.6	265270000	546590000	241990000	3.51283e+08	0	0	25696000	8.56533e+06	0	53039000	332960000	1.28666e+08	0.0665701
O60231;A0A140T947;A2AB15;Q5SQH5;A0A140T8Y5;A0A140T9T4	Pre-mRNA-splicing factor ATP-dependent RNA helicase DHX16	DHX16			6	7	1	4	2	3	2	0	2	1	1	1	4	2	3	2	0	2	1	1	119.26	0	14.668	1.9	6.8	2.3	4.1	2.3	0	3.3	1.9	1.9	54406000	417900000	109470000	1.93925e+08	134870000	252830000	0	1.29233e+08	141580000	81505000	0	7.43617e+07	1.7379
Q6P158;H7C109;A0A087WZ11	Putative ATP-dependent RNA helicase DHX57	DHX57			3	3	2	0	1	0	2	0	0	1	0	2	0	1	0	2	0	0	1	0	155.6	0	10.185	2.3	0	1	0.6	1.9	0	0.6	0.9	0	154630000	0	104840000	86490000	0	91043000	0	3.03477e+07	0	98981000	0	3.29937e+07	0.919803
H0YJZ6;A0A7I2YBM0;Q9UPY3;A0A6Q8PH99;A0A6Q8PHG6	Endoribonuclease Dicer	DICER1			5	2	1	1	1	0	1	0	0	1	0	1	1	1	0	1	0	0	1	0	195.09	0.00032373	4.4952	0.6	0.7	0.6	0	0.7	0	0	0.7	0	34799000	57583000	34273000	4.22183e+07	0	19103000	0	6.36767e+06	0	52164000	0	17388000	0.36621
Q9Y2L1;G3V1J5;F2Z2C0	Exosome complex exonuclease RRP44	DIS3			3	17	6	10	7	7	5	4	5	5	4	6	10	7	7	5	4	5	5	4	109	0	116.54	9	13.8	9.4	10.6	8.6	5.5	6.9	7.1	5.4	877930000	1233600000	1286400000	1.13264e+09	792530000	394600000	655400000	6.14177e+08	408070000	621560000	465790000	4.98473e+08	1.23212
E7EQD7;A0A590UJ64;A0A590UJS9;A0A590UJ68;A0A590UJ18;A0A590UJ08;A0A590UJR5;A0A590UJC5;A0A590UKA8;A0A0C4DFT3;A0A590UJD9;Q12959;A0A590UJ95;B4E2H8;C9JUA9;A0A590UJ25;A0A590UJL2;A0A590UK70;A0A590UK02;A0A590UJ29;A0A590UK81;A0A590UJR4;A0A590UK48;A0A590UJX2;A0A590UJ81;C9JCP6;A8MUT6;C9JN61;H7C166;C9J110;F2Z2L0;A0A590UJE6;C9IYP1;A0A590UJ86;A0A590UK52;A0A590UJZ4	Disks large homolog 1	DLG1			36	5	0	0	3	0	2	1	0	0	1	0	0	3	0	2	1	0	0	1	71.856	0	16.578	0	0	10.5	0	3.2	2	0	0	2	0	0	451920000	150640000	0	72707000	89288000	5.39983e+07	0	0	145400000	4.84667e+07	1.11413
Q8TDM6;A0A0A0MSL1;A0A0J9YYG8	Disks large homolog 5	DLG5			3	5	3	0	3	1	0	0	1	1	1	3	0	3	1	0	0	1	1	1	213.87	0	10.46	1.7	0	1.9	0.5	0	0	0.6	0.6	0.5	181140000	0	187370000	1.22837e+08	52500000	0	0	17500000	13097000	7065700	89675000	3.66126e+07	0.477978
M0R080;A0A7I2V3K7;P25685;M0QXK0;M0R1D6;M0QZD0;M0QYT3;M0R128;A0A1B0GX60	DnaJ homolog subfamily B member 1	DNAJB1			9	5	2	3	1	1	0	0	2	1	0	1	3	1	1	0	0	1	1	0	20.497	0	15.266	15.3	22.4	8.7	8.7	0	0	16.4	8.7	0	231760000	541090000	55041000	2.75964e+08	122030000	0	0	4.06767e+07	143970000	137150000	0	9.37067e+07	0.434085
Q5TDG9;Q5TDH4;Q9Y2G8	DnaJ homolog subfamily C member 16	DNAJC16			3	3	1	1	1	1	1	0	1	1	0	1	1	1	1	1	0	1	1	0	69.312	0	25.672	3	3	3	3	2.2	0	1.7	3	0	183120000	0	120880000	1.01333e+08	208180000	37588000	0	8.19227e+07	35463000	94915000	0	4.34593e+07	1.88504
Q96HP0;K7ESB7;K7EP20	Dedicator of cytokinesis protein 6	DOCK6			3	5	2	1	2	2	0	2	0	0	3	2	1	2	2	0	2	0	0	3	229.56	0	14.236	1.7	0.9	1.2	2	0	1.6	0.5	0	2.1	696270000	55551000	264390000	338737000	215930000	0	158950000	124960000	0	0	274270000	9.14233e+07	1.36683
A0A3B3ISU0;Q02487;J3QRL9;Q14574	Desmocollin-2	DSC2			4	2	0	0	1	0	0	0	0	1	0	0	0	1	0	0	0	0	1	0	83.816	0	25.349	0	0	2.4	0	0	0	0	1.6	0	0	0	113670000	37890000	0	0	0	0	0	39938000	0	1.33127e+07	0
H0YMM5;H0YNJ9;H0YNW5;H0YKC5;H0YKI0;P33316;A0A0C4DGL3;H0YMP1	Deoxyuridine 5-triphosphate nucleotidohydrolase	DUT			8	3	1	1	0	0	0	0	1	0	0	1	1	0	0	0	0	1	0	0	14.306	0.00032478	4.5241	10.5	9	0	0	0	0	7.5	0	0	111310000	59330000	0	56880000	0	0	0	0	23654000	0	0	7.88467e+06	0
Q92997;F8WCF1;A0A3B3ISG4;A0A3B3ITC6;I3L0M7;I3L2W9;I3L2N2;O14641	Segment polarity protein dishevelled homolog DVL-3	DVL3			8	3	1	1	1	1	0	1	0	0	1	1	1	1	1	0	1	0	0	1	78.054	0	5.6296	1.7	1.4	1.7	1	0	1.7	0	0	1.7	12358000	120060000	22325000	51581000	43627000	0	23757000	2.24613e+07	0	0	34296000	11432000	1.96478
J3KRI4;O43237;J3KRZ2	Cytoplasmic dynein 1 light intermediate chain 2	DYNC1LI2			3	3	0	2	1	0	0	0	1	0	1	0	2	1	0	0	0	1	0	1	17.778	0	7.2059	0	16.8	7.2	0	0	0	7.2	0	9	0	283230000	108760000	1.30663e+08	0	0	0	0	95185000	0	36026000	43737000	0
P63172	Dynein light chain Tctex-type 1	DYNLT1			1	2	1	0	1	0	0	0	0	0	0	1	0	1	0	0	0	0	0	0	12.452	0	13.864	15.9	0	14.2	0	0	0	0	0	0	93834000	0	41528000	4.51207e+07	0	0	0	0	0	0	0	0	#DIV/0!
P24534;F8WF65;F2Z2G2;C9JZW3	Elongation factor 1-beta	EEF1B2			4	4	1	3	1	0	0	0	1	1	0	1	3	1	0	0	0	1	1	0	24.763	0	12.483	4.4	20.9	6.7	0	0	0	4.4	4.4	0	62279000	791300000	77369000	310316000	0	0	0	0	129130000	275690000	0	134940000	0
P98172	Ephrin-B1	EFNB1			1	3	0	0	1	0	0	1	0	0	2	0	0	1	0	0	1	0	0	2	38.006	0	8.1717	0	0	5.2	0	0	5.2	0	0	9	0	0	173560000	5.78533e+07	0	0	60866000	2.02887e+07	0	0	46694000	1.55647e+07	1.30351
A0A1B0GUZ7;Q14156	Protein EFR3 homolog A	EFR3A			2	2	0	0	2	0	0	0	0	0	1	0	0	2	0	0	0	0	0	1	96.13	0	9.7979	0	0	4.5	0	0	0	0	0	1.5	0	0	190380000	63460000	0	0	0	0	0	0	49877000	1.66257e+07	0
Q08426	Peroxisomal bifunctional enzyme	EHHADH			1	8	2	3	1	1	5	0	4	2	0	2	3	1	1	5	0	4	2	0	79.494	0	18.21	3.9	5.8	1.8	1.8	8.9	0	9.7	4.4	0	427570000	283960000	45043000	252191000	220850000	300890000	0	1.73913e+08	214600000	136810000	0	1.17137e+08	1.4847
A0A0U1RQK7;A0A0A0MSA7;O43432	Eukaryotic translation initiation factor 4 gamma 3	EIF4G3			3	5	2	4	0	0	1	0	0	2	0	2	4	0	0	1	0	0	2	0	195.3	0	13.917	3.9	6.1	1.1	1.4	4	0.7	3.3	4.8	2	166470000	273980000	0	1.46817e+08	0	52516000	0	1.75053e+07	0	199740000	0	66580000	0.262922
E7ES68;G5E9D5;Q9BQ52;H7C2I4;V9GYS7	Zinc phosphodiesterase ELAC protein 2	ELAC2			5	6	3	1	2	4	0	0	1	1	1	3	1	2	4	0	0	1	1	1	70.106	0	19.585	6.9	2.4	5	9.7	0	0	2.4	2.4	2.4	500190000	103320000	126330000	243280000	507570000	0	0	169190000	133100000	103990000	93378000	110156000	1.53591
Q9P0I2;S4R3U9;C9JLM9	ER membrane protein complex subunit 3	EMC3			3	4	3	0	2	2	3	1	0	1	2	3	0	2	2	3	1	0	1	2	29.952	0	54.816	18.8	0	11.9	12.3	15.7	5.4	0	5.4	11.9	522790000	0	160410000	2.27733e+08	297490000	80091000	99312000	1.58964e+08	0	89207000	235170000	1.08126e+08	1.47018
Q9H4G0;X6RC15	Band 4.1-like protein 1	EPB41L1			2	31	17	17	18	13	19	13	12	15	12	1	1	1	0	0	1	1	1	1	98.502	0	262.4	23.3	28.7	27.2	19.9	27.2	21.7	22.5	28	19.3	11278000000	8357700000	10363000000	9.99957e+09	8767200000	5902100000	3996000000	6.22177e+09	4484200000	4935500000	3006800000	4.14217e+09	1.50206
Q9UBC2;M0R165;M0R2S2;K7EJR2;M0R330;M0QX30;M0R1V5;M0R3I1	Epidermal growth factor receptor substrate 15-like 1	EPS15L1			8	13	8	8	8	7	1	7	1	4	5	8	8	8	7	1	7	1	4	5	94.254	0	136.49	15.2	14.9	13.4	10.8	4.2	9.6	1.9	6.1	8.4	1278500000	798030000	924220000	1000250000	1241200000	113780000	515300000	6.23427e+08	144140000	396030000	628650000	3.89607e+08	1.60014
A0A3B3ISQ4;Q9H6S3;A0A087WX39;E9PN68;E9PLN2;E9PNT0;E9PLH1;H0YD62;H0YF37	Epidermal growth factor receptor kinase substrate 8-like protein 2	EPS8L2			9	12	3	5	7	2	1	3	2	3	1	3	5	7	2	1	3	2	3	1	88.063	0	45.926	4.2	8.1	10	3.2	2.3	4.3	3.9	5.6	2.3	229000000	481960000	728290000	479750000	133240000	19029000	265590000	1.39286e+08	152280000	271900000	79107000	1.67762e+08	0.83026
P04626;J3QLU9;B4DTR1;F5H1T4;J3KTI5;J3QRX1	Receptor tyrosine-protein kinase erbB-2	ERBB2			6	14	1	0	12	1	0	8	0	1	6	0	0	11	1	0	7	0	1	5	137.91	0	44.44	1.6	1.7	13.3	2.2	1	8.6	1.7	3	7.3	171460000	0	1619600000	597020000	94032000	0	800400000	298144000	0	93358000	648170000	247176000	1.2062
P41212;H0YG25	Transcription factor ETV6; Transcription factor ETV6	ETV6			2	7	3	4	2	4	3	2	3	3	1	3	4	2	4	3	2	3	3	1	52.999	0	23.837	6.2	11.3	3.3	8.2	9.1	4.4	6.4	6.4	1.5	1050200000	447670000	156600000	551490000	700190000	509510000	67061000	425587000	386010000	271520000	56896000	238142000	1.78711
Q6P587	Acylpyruvase FAHD1, mitochondrial	FAHD1			1	2	0	0	2	0	0	0	0	0	0	0	0	2	0	0	0	0	0	0	24.843	0.00090964	3.412	0	0	9.8	0	0	0	0	0	0	0	0	199520000	6.65067e+07	0	0	0	0	0	0	0	0	#DIV/0!
Q96GK7;Q6P2I3;C9J5B6;C9JGM0	Fumarylacetoacetate hydrolase domain-containing protein 2A	FAHD2A			4	3	1	2	1	1	1	1	1	1	1	1	2	1	1	1	1	1	1	1	34.596	0	17.667	4.8	10.2	4.8	4.8	9.9	4.8	4.8	4.8	4.8	287700000	119710000	223230000	2.10213e+08	258040000	96547000	116160000	1.56916e+08	124880000	0	123180000	8.26867e+07	1.89771
Q96PZ2;A0A6Q8PF34;E9PNQ0;A0A6Q8PHI8;E9PR18	Serine protease FAM111A	FAM111A			5	4	4	0	0	1	0	0	1	0	0	4	0	0	1	0	0	1	0	0	70.195	0	6.7892	8.7	0	0	2.6	0	0	2.6	0	0	277440000	0	0	92480000	121490000	0	0	4.04967e+07	135290000	0	0	4.50967e+07	0.897997
Q5T0W9	Protein FAM83B	FAM83B			1	6	2	1	5	2	0	1	1	1	0	2	1	5	2	0	1	1	1	0	114.8	0	21.04	3.3	1.4	6.9	2.7	0	1	1.4	1.4	0	306550000	58479000	338170000	2.344e+08	0	0	60005000	2.00017e+07	96386000	57683000	0	5.13563e+07	0.389468
E9PH82;Q8NCA5;C9J3G8	Protein FAM98A	FAM98A			3	4	2	3	2	3	2	2	1	3	1	2	3	2	3	2	2	1	3	1	34.431	0	15.26	8.7	11.5	8.7	13.1	7.1	8.7	3.2	11.9	3.8	191770000	722030000	152940000	355580000	365270000	187530000	104000000	2.18933e+08	75850000	307290000	49476000	1.44205e+08	1.51821
G3V2M5;G3V5S9;G3V1S4;Q9Y324	rRNA-processing protein FCF1 homolog	FCF1			4	2	1	0	0	0	0	0	0	0	1	1	0	0	0	0	0	0	0	1	7.0253	0.0017626	2.9874	18	0	0	0	0	0	0	0	24.6	120050000	0	0	4.00167e+07	0	0	0	0	0	0	14982000	4994000	0
Q9BQL6;G3V1L6	Fermitin family homolog 1	FERMT1			2	3	0	2	0	0	1	0	1	0	0	0	2	0	0	1	0	1	0	0	77.436	0	21.168	0	4.6	0	0	1.8	0	2.4	0	0	0	198500000	0	6.61667e+07	0	0	0	0	58843000	0	0	1.96143e+07	0
E9PSD3;O43427;E9PJW6	Acidic fibroblast growth factor intracellular-binding protein	FIBP			3	2	1	1	0	0	1	0	0	0	0	1	1	0	0	1	0	0	0	0	39.313	0.0006152	3.6138	2	2	0	0	4.6	0	0	0	0	99630000	42309000	0	47313000	0	0	0	0	0	0	0	0	#DIV/0!
Q96PY5;C9IZY8;F8W1F5;Q8IVF7;F8VYL1	Formin-like protein 2	FMNL2			5	4	0	2	1	0	2	0	0	1	0	0	2	1	0	2	0	0	1	0	123.32	0	11.483	0	2.6	1	0	1.7	0	0	0.9	0	0	262640000	38754000	1.00465e+08	0	129120000	0	43040000	0	65962000	0	2.19873e+07	1.95749
Q5VW36;S4R400	Focadhesin	FOCAD			2	2	1	0	2	0	0	1	0	1	1	1	0	2	0	0	1	0	1	1	200.07	0.0011926	3.2157	0.6	0	1	0	0	0.6	0	0.6	0.6	60872000	0	271650000	1.10841e+08	0	0	56139000	18713000	0	61482000	79113000	46865000	0.399296
E9PS62;Q9BZ67;E9PRP1;Q9BZ68	FERM domain-containing protein 8	FRMD8			4	4	1	1	1	1	2	0	1	1	0	1	1	1	1	2	0	1	1	0	20.539	0	16.991	9.2	4.3	7.1	9.2	9.2	0	4.3	4.3	0	99560000	60085000	125600000	9.50817e+07	88829000	22594000	0	37141000	42554000	44263000	0	28939000	1.28342
A0A7I2YQ65;A0A7I2V2L5;A0A7I2YQM2;A0A7I2V452;A0A7P0RGV0;A0A669KB10;A0A669KBG8;Q92538;A0A7I2V529;A0A7I2V514;A0A7I2V2L4;A0A7I2V3Y5;A0A7I2V4K2;A0A7I2V4F9;A0A7I2YQN3;A0A7I2V3H2;A0A7I2V329;A0A7I2V2I0;A0A7I2V4H1;A0A7I2YQA6;A0A7I2V5C9;A0A7I2V3S0;A0A7I2V350;A0A7I2V3E5;A0A7I2V342;A0A7I2V3Q4	Golgi-specific brefeldin A-resistance guanine nucleotide exchange factor 1	GBF1			26	7	2	3	3	2	1	1	0	1	2	2	3	3	2	1	1	0	1	2	194.17	0	53.896	2.2	2.3	3	2.2	0.6	1	0	1	2.2	168670000	142630000	177460000	162920000	210720000	41673000	85771000	1.12721e+08	0	24391000	153210000	5.92003e+07	1.90407
Q7L5L3	Lysophospholipase D GDPD3	GDPD3			1	2	2	0	1	1	0	0	0	0	1	2	0	1	1	0	0	0	0	1	36.596	0	8.7193	8.2	0	4.4	3.8	0	0	0	0	3.8	307610000	0	53073000	1.20228e+08	95145000	0	0	31715000	0	0	81576000	27192000	1.16634
Q96IJ6;A0A0U1RRC2;A0A087WUI8	Mannose-1-phosphate guanyltransferase alpha	GMPPA			3	2	1	1	1	1	0	1	1	1	1	1	1	1	1	0	1	1	1	1	46.291	0	5.2355	2.6	2.6	2.6	2.6	0	2.6	2.6	2.6	3.6	53199000	63838000	54107000	57048000	36724000	0	0	1.22413e+07	34172000	48064000	0	27412000	0.446568
Q9Y223;A0A7I2SU25	Bifunctional UDP-N-acetylglucosamine 2-epimerase/N-acetylmannosamine kinase	GNE			2	5	0	2	2	0	0	3	0	1	1	0	2	2	0	0	3	0	1	1	79.274	0	14.165	0	4.6	3.3	0	0	4.4	0	2.5	1.2	0	293100000	462450000	251850000	0	0	181740000	60580000	0	36168000	85866000	40678000	1.48926
Q13439;H0Y6I0;C9JHJ5;E7EVX2;Q86W71;A0A087WTW2	Golgin subfamily A member 4	GOLGA4			6	26	8	3	15	7	1	4	5	3	8	8	3	15	7	1	4	5	3	8	261.14	0	73.818	4.4	1.9	7.6	3.9	0.4	2.1	3.1	1.6	4.1	694490000	188030000	1742300000	874940000	570490000	26689000	350720000	3.15966e+08	423050000	194360000	604490000	407300000	0.775758
Q14789;E7EU81;H0Y867;H7C5I7	Golgin subfamily B member 1	GOLGB1			4	38	21	10	18	17	4	10	12	6	12	21	10	18	17	4	10	12	6	12	376.01	0	323.31	10.7	4.6	7.9	8.3	1.9	5.1	5.6	3	5.9	3510900000	848410000	5720800000	3.36004e+09	2901000000	391060000	1159300000	1.48379e+09	1991900000	667170000	2267200000	1642090000	0.903596
Q9UKJ3;K7EKU0	G patch domain-containing protein 8	GPATCH8			2	9	7	0	0	4	0	1	2	1	1	7	0	0	4	0	1	2	1	1	164.2	0	29.781	9.6	0	0	3.4	0	1.1	1.7	1.1	0.6	639900000	0	0	213300000	463130000	0	0	1.54377e+08	23168000	70941000	151140000	8.17497e+07	1.88841
Q7Z2K8	G protein-regulated inducer of neurite outgrowth 1	GPRIN1			1	3	0	0	2	0	1	0	0	0	1	0	0	2	0	1	0	0	0	1	102.4	0	4.9543	0	0	3.5	0	0.9	0	0	0	0.9	0	0	136900000	4.56333e+07	0	43971000	0	14657000	0	0	28499000	9.49967e+06	1.5429
Q14451	Growth factor receptor-bound protein 7	GRB7			1	2	1	2	0	1	0	0	0	1	0	1	2	0	1	0	0	0	1	0	59.68	0.0006217	3.7772	1.5	5.6	0	1.5	0	0	0	1.5	0	36502000	119030000	0	51844000	37772000	0	0	1.25907e+07	0	60183000	0	20061000	0.627619
P35626;P25098;Q8N433;E9PRV7	Beta-adrenergic receptor kinase 2	GRK3			4	2	0	1	0	0	0	0	1	0	0	0	1	0	0	0	0	1	0	0	79.709	0	5.8172	0	1.3	0	0	0	0	2.6	0	0	0	117600000	0	39200000	0	0	0	0	4200600	0	0	1400200	0
A0A3B3ITW1;A0A7I2YQK0;P49841;A0A7I2V3J4;A0A7I2V606;A0A7I2V2I5;A0A7I2YQB0;A0A7I2V2K7;A0A7I2YQU1;A0A7I2V3G9;A0A7I2V4X3;A0A7I2V3Z5;A0A7I2V4X2;A0A7I2V3T3;A0A7I2V5G5;A0A7I2V5K9;A0A7I2V3D8;A0A7I2V2V4;A0A7I2V441;A0A7I2V4F3	Glycogen synthase kinase-3 beta	GSK3B			20	3	1	1	3	0	0	1	0	1	1	1	1	3	0	0	1	0	1	1	43.479	0	15.598	6.2	6.2	12.9	0	0	6.2	0	6.2	6.2	66724000	69477000	277580000	137927000	0	0	0	0	0	48754000	56316000	3.50233e+07	0
P29084;E5RH41	Transcription initiation factor IIE subunit beta	GTF2E2			2	5	1	5	0	0	0	0	0	2	0	1	5	0	0	0	0	0	2	0	33.043	0	24.918	2.7	22.3	0	0	0	0	0	8.9	0	22087000	818160000	0	2.80082e+08	0	0	0	0	0	343450000	0	1.14483e+08	0
P35269;M0QXD6;M0R0R9;M0R0Z3	General transcription factor IIF subunit 1	GTF2F1			4	7	0	7	0	0	0	0	0	3	0	0	7	0	0	0	0	0	3	0	58.24	0	38.706	0	21.5	0	0	0	0	0	9.5	0	0	999490000	0	3.33163e+08	0	0	0	0	0	319000000	0	1.06333e+08	0
Q7Z4V5;A0A087WT54;A0A087WZ99;M0R0J3;K7ERA4	Hepatoma-derived growth factor-related protein 2	HDGFL2			5	5	0	4	0	0	3	0	0	4	0	0	4	0	0	3	0	0	4	0	74.316	0	25.343	0	7.5	0	0	6	0	0	7.5	0	0	417930000	0	139310000	0	149650000	0	4.98833e+07	0	188340000	0	62780000	0.794574
Q9P2D3	HEAT repeat-containing protein 5B	HEATR5B			1	2	0	1	0	0	1	0	0	0	0	0	1	0	0	1	0	0	0	0	224.3	0	10.956	0	0.8	0	0	0.6	0	0	0	0	0	64212000	0	21404000	0	0	0	0	0	0	0	0	#DIV/0!
Q15751	Probable E3 ubiquitin-protein ligase HERC1	HERC1			1	2	0	2	0	0	0	0	0	0	0	0	2	0	0	0	0	0	0	0	532.22	0.0012037	3.33	0	0.5	0	0	0	0	0	0	0	0	21203000	0	7.06767e+06	0	0	0	0	0	0	0	0	#DIV/0!
Q5GLZ8	Probable E3 ubiquitin-protein ligase HERC4	HERC4			1	5	0	2	3	0	1	1	0	0	2	0	2	3	0	1	1	0	0	2	118.56	0	14.097	0	2.6	3.2	0	1.8	1.1	0	0	3.1	0	200990000	448270000	216420000	0	123290000	215530000	112940000	0	0	190150000	6.33833e+07	1.78186
P26583;D6R9A6	High mobility group protein B2	HMGB2			2	8	0	7	0	0	0	0	5	1	0	0	6	0	0	0	0	4	1	0	24.033	0	34.517	0	32.1	0	0	0	0	18.7	6.2	0	0	3688200000	0	1229400000	0	0	0	0	1228500000	51758000	0	4.26753e+08	0
Q96ED9;K7ENU5	Protein Hook homolog 2	HOOK2			2	5	1	3	1	1	2	1	0	2	1	1	3	1	1	2	1	0	2	1	83.206	0	11.74	1.4	8.3	1.4	1.4	2.5	1.4	0	3.9	1.4	91370000	303250000	136200000	176940000	78918000	218490000	66734000	1.21381e+08	0	118150000	89062000	6.90707e+07	1.75734
Q0VDF9	Heat shock 70 kDa protein 14	HSPA14			1	2	0	2	0	0	0	0	0	0	0	0	2	0	0	0	0	0	0	0	54.794	0.0083648	2.0701	0	7.1	0	0	0	0	0	0	0	0	224370000	0	74790000	0	0	0	0	0	0	0	0	#DIV/0!
P09914	Interferon-induced protein with tetratricopeptide repeats 1	IFIT1			1	4	0	1	2	0	1	1	0	0	1	0	1	2	0	1	1	0	0	1	55.36	0	11.586	0	2.1	7.7	0	2.7	3.3	0	0	3.3	0	0	168720000	56240000	0	0	82439000	2.74797e+07	0	0	48878000	1.62927e+07	1.68663
P09913;A0A7P0T8R6;A0A087X279;A0A7P0TAT2;A0A7P0T8B3	Interferon-induced protein with tetratricopeptide repeats 2	IFIT2			5	2	1	1	1	0	0	0	0	0	0	1	1	1	0	0	0	0	0	0	54.632	0	5.3344	2.3	2.8	2.3	0	0	0	0	0	0	69133000	74893000	105180000	8.30687e+07	0	0	0	0	0	0	0	0	#DIV/0!
A0A3B3ITR9;A0A3B3ISI3;A0A3B3ITL0;A0A3B3IRJ9;Q9Y2H2;A0A3B3ISJ5	Phosphatidylinositide phosphatase SAC2	INPP5F			6	2	0	1	0	0	0	0	0	2	0	0	1	0	0	0	0	0	2	0	75.177	0	5.0092	0	2	0	0	0	0	0	3.3	0	0	69029000	0	2.30097e+07	0	0	0	0	0	21760000	0	7.25333e+06	0
A0A087WXN4;Q96CB8;E9PGI3;A0A1B0GX90;C9JDP3;C9J0M6;D6R9W3	Integrator complex subunit 12	INTS12			7	4	1	0	1	1	0	0	0	0	1	1	0	1	1	0	0	0	0	1	46.666	0	6.4086	3.6	0	3.8	2	0	0	0	0	2	168680000	0	69601000	79427000	0	0	0	0	0	0	117270000	39090000	0
Q6DN90;A0A2R8Y7T6;A0A3B3IRZ4;A0A3B3IU98;A0A0C4DGT3;A0A2R8Y695;A0A1W2PRJ5;A0A1W2PR28;A0A6Q8PFR7;Q5JU85;A0A1W2PPU7;A0A0G2JLG2;Q9UPP2	IQ motif and SEC7 domain-containing protein 1	IQSEC1			13	16	6	7	10	7	5	7	1	5	3	6	7	10	7	5	7	1	5	3	108.31	0	83.773	8.3	11	12.5	8.8	6.4	9	1.3	7.5	4.2	1608500000	1169200000	2185100000	1.65427e+09	1304400000	482690000	950400000	9.12497e+08	115760000	892010000	479400000	4.95723e+08	1.84074
Q8IU81	Interferon regulatory factor 2-binding protein 1	IRF2BP1			1	2	1	0	1	0	1	0	0	0	0	1	0	1	0	1	0	0	0	0	61.687	0.0020225	2.7662	3.3	0	3.3	0	3.6	0	0	0	0	44325000	0	51021000	31782000	0	0	0	0	0	0	0	0	#DIV/0!
P06756	Integrin alpha-V	ITGAV			1	4	2	0	0	1	1	0	0	0	2	2	0	0	1	1	0	0	0	2	116.04	0	12.78	3.1	0	0	1	1	0	0	0	2.8	360520000	0	0	1.20173e+08	101120000	44304000	0	4.84747e+07	0	0	139820000	4.66067e+07	1.04008
Q63ZY3;K7ERU2;K7EIU4	KN motif and ankyrin repeat domain-containing protein 2	KANK2			3	5	2	1	3	0	0	0	1	0	0	2	1	3	0	0	0	1	0	0	91.173	0	12.53	3.6	2	6.8	0	0	0	2	0	0	104930000	58199000	238410000	1.33846e+08	0	0	0	0	47451000	0	0	15817000	0
A0A1B0GV47;Q7Z4S6;H0YIM7;H0YHT2;O75037	Kinesin-like protein KIF21A	KIF21A			5	4	0	2	1	1	1	0	0	2	0	0	2	1	1	1	0	0	2	0	184.71	0	5.2277	0	1.5	0.7	0.9	0.9	0	0	2.2	0	0	104770000	1869900000	6.58223e+08	50955000	57345000	0	36100000	0	257760000	0	85920000	0.420158
A0A6Q8PGG2;A0A6Q8PHL8;A0A6Q8PH45;A0A1B0GUA3;Q96EK5;A0A1B0GUH6	KIF-binding protein	KIFBP			6	2	1	1	2	1	0	2	0	1	1	1	1	2	1	0	2	0	1	1	52.619	0	39.102	4.2	4.2	8.9	4.2	0	8.9	0	4.2	4.2	127150000	112660000	217100000	1.52303e+08	139700000	0	179490000	1.06397e+08	0	101070000	116340000	72470000	1.46815
P52294;C9JYI4;C9J352;C9JWD9;F2Z3G4;C9J4U1	Importin subunit alpha-5	KPNA1			6	5	2	2	3	1	1	2	0	3	2	2	2	3	1	1	2	0	3	2	60.221	0	34.301	4.1	16	8.7	5.9	10.4	12.6	7.2	15.4	10.8	280710000	241750000	538260000	3.53573e+08	60401000	121950000	294550000	158967000	0	394820000	114240000	1.69687e+08	0.936827
Q08380;K7EP36;K7ESM3;K7EKQ5;K7ERZ6;K7EJD3;K7ES75;K7EN99;K7EJY8;K7EQT9	Galectin-3-binding protein	LGALS3BP			10	15	8	11	8	10	7	9	7	11	8	8	11	8	10	7	9	7	11	8	65.33	0	323.31	18.5	29.1	18.5	24.4	15	20.7	17.9	29.4	17.6	12148000000	4137500000	3624100000	6.63653e+09	10558000000	3067200000	3683600000	5769600000	1749500000	3778100000	3596200000	3.04127e+09	1.8971
Q9UIQ6	Leucyl-cystinyl aminopeptidase	LNPEP			1	4	1	1	0	0	1	0	0	0	1	1	1	0	0	1	0	0	0	1	117.35	0	6.3813	1.4	1.3	0	0	1.1	0	0	0	0.9	139320000	303160000	0	1.47493e+08	0	29673000	0	9891000	0	0	21737000	7.24567e+06	1.36509
Q7L5N7;H3BU68	Lysophosphatidylcholine acyltransferase 2	LPCAT2			2	6	2	1	0	2	1	1	1	1	0	2	1	0	2	1	1	1	1	0	60.207	0	14.496	3.7	1.3	0	3.7	1.7	2.2	3.9	2.2	0	210220000	376610000	0	195610000	277730000	64538000	25443000	1.2257e+08	74532000	0	0	24844000	4.9336
Q96II8;E9PD99;H7C1G3;H7C0J8;F8WFB5	DISP complex protein LRCH3	LRCH3			5	7	0	1	3	0	1	2	0	0	2	0	1	2	0	1	2	0	0	1	86.082	0	10.588	0	2.3	4.8	0	1.5	3.1	0	0	2.4	0	109780000	341480000	150420000	0	47178000	127040000	5.80727e+07	0	0	180030000	60010000	0.967716
Q07954	Prolow-density lipoprotein receptor-related protein 1	LRP1			1	3	1	0	2	1	0	1	0	0	2	1	0	2	1	0	1	0	0	2	504.6	0	6.6939	0.2	0	0.4	0.2	0	0.2	0	0	0.5	79530000	0	315990000	131840000	73904000	0	66684000	4.68627e+07	0	0	138400000	4.61333e+07	1.01581
A0A0B4J2G4;Q15345;A0A0C4DH00;A0A087X0S7;A0A087WTU1;A0A087WTI9	Leucine-rich repeat-containing protein 41	LRRC41			6	4	0	1	2	0	1	0	0	0	0	0	1	2	0	1	0	0	0	0	86.238	0	9.8325	0	2.5	3.9	0	1.8	0	0	0	0	0	67479000	156730000	7.47363e+07	0	0	0	0	0	0	0	0	#DIV/0!
S4R3V8;Q86X29;M0R1W9;M0QZL9	Lipolysis-stimulated lipoprotein receptor	LSR			4	8	2	3	5	2	2	3	2	0	3	2	3	5	2	2	3	2	0	3	66.175	0	51.259	9.7	7.8	11.5	7.8	6.3	7.8	4.3	0	6.7	353140000	324550000	745890000	4.74527e+08	203210000	130390000	409120000	2.47573e+08	194030000	0	215000000	1.36343e+08	1.81581
A0A087X1K9;O75608;B4DP64;E5RGR0	Acyl-protein thioesterase 1	LYPLA1			4	3	2	0	3	1	1	2	1	0	1	2	0	3	1	1	2	1	0	1	17.981	0	5.1197	14.5	0	21.1	6.6	6.6	14.5	6.6	0	6.6	388040000	0	379920000	2.55987e+08	191360000	93253000	122870000	1.35828e+08	201480000	0	74209000	9.18963e+07	1.47805
Q6ZN28	Metastasis-associated in colon cancer protein 1	MACC1			1	2	0	0	2	1	0	0	0	0	1	0	0	2	1	0	0	0	0	1	96.638	0.001194	3.2313	0	0	2.5	1.1	0	0	0	0	1.4	0	0	315180000	105060000	57255000	0	0	19085000	0	0	65914000	2.19713e+07	0.868632
O60476	Mannosyl-oligosaccharide 1,2-alpha-mannosidase IB	MAN1A2			1	2	1	2	1	1	0	0	1	1	0	1	2	1	1	0	0	1	1	0	73.003	0.0020319	2.8211	1.2	3.9	1.2	1.2	0	0	1.2	1.2	0	315860000	290290000	285540000	297230000	307910000	0	0	1.02637e+08	229440000	185030000	0	1.38157e+08	0.742901
E7ENQ1;G3XAA2;H7C360;G5E948;A0A0D9SEY1;O95819;E7EN19;E7EX83;A0A0D9SG62;C9J840;H7C0P6;H7C3Z6;E7ETN6;I3L203	Mitogen-activated protein kinase kinase kinase kinase 4	MAP4K4			14	22	12	6	10	8	4	4	3	4	4	9	5	6	4	3	2	2	3	2	132.16	0	94.326	12.7	6.7	10.7	8.3	5.9	5.1	4.4	5.5	5.4	1707400000	775290000	1160100000	1.21426e+09	1554700000	168970000	166370000	6.30013e+08	394350000	519320000	395160000	4.36277e+08	1.44407
A0A7I2YQR3;A0A0A0MRU9;E7ETY4;E9PC69;Q7KZI7;A0A7I2V3R3;F5H6N2;F5H4F6;F5H4J8;A0A7I2YQF3	Non-specific serine/threonine protein kinase	MARK2			10	7	3	1	3	0	5	0	1	2	1	3	1	3	0	5	0	1	2	1	80.575	0	42.271	6.5	2.4	5.4	0	11.6	0	2.4	4.6	2.2	361470000	95683000	206050000	2.21068e+08	0	266730000	0	88910000	96053000	149050000	0	81701000	1.08824
P31153;Q00266	S-adenosylmethionine synthase isoform type-2	MAT2A			2	4	0	1	3	0	0	1	1	1	0	0	1	3	0	0	1	1	1	0	43.66	0	10.021	0	3.8	9.4	0	0	1.8	2.8	3.8	0	0	171730000	409250000	193660000	0	0	0	0	52441000	131870000	0	61437000	0
Q7Z434	Mitochondrial antiviral-signaling protein	MAVS			1	2	1	0	2	0	0	0	0	1	0	1	0	2	0	0	0	0	1	0	56.527	0.0020558	2.9798	2.6	0	5	0	0	0	0	2.6	0	82777000	0	155710000	7.94957e+07	0	0	0	0	0	87815000	0	2.92717e+07	0
O95243	Methyl-CpG-binding domain protein 4	MBD4			1	3	2	0	1	2	2	0	1	1	1	2	0	1	2	2	0	1	1	1	66.05	0	33.919	4.3	0	1.4	4.3	5.2	0	1.4	2.9	2.2	317210000	0	0	1.05737e+08	108680000	33063000	0	4.72477e+07	47286000	32922000	32854000	3.76873e+07	1.25367
Q15648;J3KSD7;J3QKZ7	Mediator of RNA polymerase II transcription subunit 1	MED1			3	7	1	2	0	3	4	0	3	1	1	1	2	0	3	4	0	3	1	1	168.48	0	22.512	0.9	1.6	0	2.5	3.4	0	2.6	0.9	0.9	236170000	83108000	0	106426000	60974000	153090000	0	7.13547e+07	107190000	0	0	35730000	1.99705
Q6P2C8;A0A494C0P0;A0A494C0K7	Mediator of RNA polymerase II transcription subunit 27	MED27			3	2	1	1	1	0	0	0	0	1	1	1	1	1	0	0	0	0	1	1	35.431	0	8.6721	6.1	3.5	6.1	0	0	0	0	3.5	6.1	86736000	43779000	27769000	5.27613e+07	0	0	0	0	0	32512000	0	1.08373e+07	0
P08581	Hepatocyte growth factor receptor	MET			1	4	3	0	2	0	0	0	1	0	1	3	0	2	0	0	0	1	0	1	155.54	0	8.5357	4.5	0	3.2	0.6	0	0.6	1.2	0	1.7	188250000	0	107010000	98420000	0	0	0	0	91544000	0	44016000	4.51867e+07	0
Q5QPE8;Q9BQP7;Q5QPE7	Mitochondrial genome maintenance exonuclease 1	MGME1			3	4	3	1	1	1	0	0	2	1	0	3	1	1	1	0	0	2	1	0	30.014	0	14.148	16.7	4.5	8	8	0	0	14.8	6.8	0	323720000	41177000	95826000	1.53574e+08	196150000	0	0	6.53833e+07	164700000	50739000	0	71813000	0.910467
Q8N4V1	ER membrane protein complex subunit 5	MMGT1			1	2	1	2	1	1	0	1	1	1	0	1	2	1	1	0	1	1	1	0	14.686	0	7.4899	18.3	26.7	18.3	18.3	0	18.3	18.3	18.3	0	227410000	317350000	125830000	223530000	238350000	0	142270000	1.26873e+08	153160000	125600000	0	92920000	1.3654
Q9BU76	Multiple myeloma tumor-associated protein 2	MMTAG2			1	2	1	0	0	0	0	0	1	0	0	1	0	0	0	0	0	1	0	0	29.411	0.0098719	1.9658	5.3	0	0	0	0	0	5.3	0	0	22060000	0	0	7.35333e+06	0	0	0	0	4177300	0	0	1.39243e+06	0
Q9H8S9;Q7L9L4;D6RCK3	MOB kinase activator 1A	MOB1A			3	5	3	4	3	3	3	2	2	3	2	3	4	3	3	3	2	2	3	2	25.079	0	18.195	11.6	21.3	13.9	13.9	16.2	10.6	12.5	16.2	8.3	334690000	906420000	559680000	6.00263e+08	487730000	211750000	195250000	2.98243e+08	201770000	298990000	287070000	262610000	1.13569
A0A286YFF8;Q7Z3U7;F8VZV1	Protein MON2 homolog	MON2			3	6	1	2	4	1	0	1	0	0	2	1	2	4	1	0	1	0	0	2	190.48	0	11.11	0.6	1.3	2.1	0.6	0	0.5	0	0	1	92801000	123970000	340250000	1.85674e+08	80964000	0	62849000	4.79377e+07	0	0	249230000	8.30767e+07	0.577029
P42345;B1AKP8;B1AKQ2	Serine/threonine-protein kinase mTOR	MTOR			3	4	0	4	1	1	0	0	0	1	0	0	4	1	1	0	0	0	1	0	288.89	0	10.174	0	2.9	0.5	0.7	0	0	0	0.7	0	0	376090000	161070000	1.79053e+08	120060000	0	0	40020000	0	109910000	0	3.66367e+07	1.09235
A0A499FJI4;O75592;H7C3U4;A0A0C4DGY7	E3 ubiquitin-protein ligase MYCBP2	MYCBP2			4	6	0	3	3	0	1	1	0	0	2	0	3	3	0	1	1	0	0	2	510.08	0	15.24	0	0.9	0.9	0	0.3	0.3	0	0	0.7	0	135010000	145670000	93560000	0	57961000	0	1.93203e+07	0	0	87277000	2.90923e+07	0.664104
Q7Z406;A1L2Z2;A0A0C4DFM8	Myosin-14	MYH14			3	63	21	44	21	18	38	19	3	25	27	10	26	10	9	18	11	0	15	16	227.87	0	323.31	16.7	30	15.9	15	26.4	14	3.5	21.4	20.2	5031300000	9604200000	6531900000	7055800000	4332900000	6465700000	3256900000	4.68517e+09	488940000	3884100000	6026000000	3.46635e+09	1.35162
A0A0A0MRM8;A0A0D9SGC1;A0A590UJ75;A0A590UKB0;A0A590UK22;A0A590UK86;A0A5F9ZI03;A0A590UJY4;A0A590UK71;A0A590UJW9	Unconventional myosin-6	MYO6			10	70	6	8	68	4	3	48	2	4	47	0	0	1	0	0	1	0	0	1	145.01	0	323.31	7.1	9.3	51.5	4.9	3.5	41.3	2.7	4.5	43.3	1052500000	846290000	95473000000	3.24573e+10	778840000	144770000	45670000000	1.55312e+10	258390000	405270000	40183000000	1.36156e+10	1.1407
M0R300;M0R0P8;Q13459;M0R2J3;H3BMM1;H3BRD5;B2RTY4	Unconventional myosin-Ixb	MYO9B			7	4	2	2	2	1	1	1	0	2	1	2	2	2	1	1	1	0	2	1	234.07	0	9.5486	1.5	2	1.5	0.8	0.8	0.8	0	1.2	0.8	143550000	173610000	200910000	172690000	130980000	70075000	68979000	9.00113e+07	0	96681000	110290000	6.89903e+07	1.30469
Q96I59;H0YE96	Probable asparagine--tRNA ligase, mitochondrial	NARS2			2	2	1	1	0	0	0	0	0	0	0	1	1	0	0	0	0	0	0	0	54.089	0	21.786	3.6	4	0	0	0	0	0	0	0	48490000	106530000	0	5.16733e+07	0	0	0	0	0	0	0	0	#DIV/0!
A0A494C1V1;Q6ZNJ1;H0Y764	Neurobeachin-like protein 2	NBEAL2			3	2	0	1	1	0	0	0	0	0	0	0	1	1	0	0	0	0	0	0	298.4	0	12.671	0	1	1.1	0	0	0	0	0	0	0	35434000	94795000	4.34097e+07	0	0	0	0	0	0	0	0	#DIV/0!
E7EWM1;Q15596	Nuclear receptor coactivator 2	NCOA2			2	4	1	1	0	1	1	0	0	1	0	1	1	0	1	1	0	0	1	0	102.73	0.00032927	4.7216	0.8	1.6	0	0.8	1.1	0	0	0.7	0	74616000	121830000	0	65482000	79778000	31668000	0	3.71487e+07	0	58424000	0	1.94747e+07	1.90754
O14777;I3L4G3;V9GYM9	Kinetochore protein NDC80 homolog	NDC80			3	5	0	4	1	1	0	0	0	1	0	0	4	1	1	0	0	0	1	0	73.912	0	9.2453	0	8.9	1.6	1.6	0	0	0	2.8	0	0	200600000	35568000	7.87227e+07	65847000	0	0	21949000	0	68008000	0	2.26693e+07	0.968224
Q92859;Q59FP8	Neogenin	NEO1			2	2	0	0	2	0	0	0	0	0	0	0	0	2	0	0	0	0	0	0	160.01	0.00062383	3.8273	0	0	1.9	0	0	0	0	0	0	0	0	328200000	109400000	0	0	0	0	0	0	0	0	#DIV/0!
Q8NBF2	NHL repeat-containing protein 2	NHLRC2			1	3	1	3	0	0	1	0	0	2	0	1	3	0	0	1	0	0	2	0	79.443	0	7.6122	2.1	4.8	0	0	2.1	0	0	3.3	0	226280000	227620000	0	151300000	0	0	0	0	0	154250000	0	5.14167e+07	0
H7C579;Q9NQR4;F8WF70	Omega-amidase NIT2	NIT2			3	2	2	1	2	2	1	1	1	1	1	2	1	2	2	1	1	1	1	1	28.633	0	6.1196	12.1	5.7	12.1	12.1	6.4	5.7	6.4	6.4	6.4	275090000	55642000	156940000	1.62557e+08	252990000	0	82773000	111921000	76738000	57483000	57571000	6.39307e+07	1.75066
P49116;C9JKS0;H7C3L1	Nuclear receptor subfamily 2 group C member 2	NR2C2			3	4	3	0	0	1	1	0	1	1	0	3	0	0	1	1	0	1	1	0	65.414	0	8.7653	6.2	0	0	3	2	0	2	2	0	211060000	0	0	7.03533e+07	0	36856000	0	1.22853e+07	65088000	0	0	21696000	0.566249
Q5TFE4;Q5QPD0	5-nucleotidase domain-containing protein 1	NT5DC1			2	3	0	0	2	1	0	1	1	0	0	0	0	2	1	0	1	1	0	0	51.844	0	11.582	0	0	7.3	2.9	0	2.9	2.9	0	0	0	0	204610000	6.82033e+07	0	0	0	0	0	0	0	0	#DIV/0!
Q5TDF0;Q9BSD7	Cancer-related nucleoside-triphosphatase	NTPCR			2	5	2	2	1	0	2	1	0	1	1	2	2	1	0	2	1	0	1	1	25.072	0	7.6324	12.3	12.7	7.9	0	13.2	7.9	0	7.9	5.3	234290000	304900000	397490000	3.12227e+08	0	206630000	463860000	2.23497e+08	0	371650000	72459000	1.48036e+08	1.50974
Q96E22	Dehydrodolichyl diphosphate synthase complex subunit NUS1	NUS1			1	2	2	0	0	0	0	0	0	0	0	2	0	0	0	0	0	0	0	0	33.224	0.00784	2.0966	9.2	0	0	0	0	0	0	0	0	51958000	0	0	1.73193e+07	0	0	0	0	0	0	0	0	#DIV/0!
O15381	Nuclear valosin-containing protein-like	NVL			1	2	0	1	1	0	0	0	0	0	0	0	1	1	0	0	0	0	0	0	95.05	0.0012103	3.3799	0	2.5	2.3	0	0	0	0	0	0	0	313860000	27402000	113754000	0	0	0	0	0	0	0	0	#DIV/0!
Q15646;A0A7P0T9H8;A0A7P0TB39;A0A7P0TBF4;H0YGP3	2-5-oligoadenylate synthase-like protein	OASL			5	12	6	8	8	6	7	8	4	7	5	6	8	8	6	7	8	4	7	5	59.225	0	129.9	18.5	23.2	23.2	18.5	22.4	23	12.5	19.8	16.5	1361500000	1649700000	2527800000	1.84633e+09	1883600000	1085500000	1772200000	1.58043e+09	360810000	1145100000	1210400000	9.05437e+08	1.74549
Q5W0B1	ORC ubiquitin ligase 1	OBI1			1	2	0	2	0	0	0	0	0	0	0	0	2	0	0	0	0	0	0	0	81.116	0.009618	1.9816	0	4.3	0	0	0	0	0	0	0	0	187940000	0	6.26467e+07	0	0	0	0	0	0	0	0	#DIV/0!
Q504Q3	PAN2-PAN3 deadenylation complex catalytic subunit PAN2	PAN2			1	2	1	1	0	0	0	0	0	1	0	1	1	0	0	0	0	0	1	0	135.37	0.0022766	2.6085	2.2	1.2	0	0	0	0	0	1.2	0	80850000	64300000	0	4.83833e+07	0	0	0	0	0	46324000	0	1.54413e+07	0
Q5VWU8	Partitioning defective 3 homolog	PARD3			1	9	2	2	8	3	2	1	2	3	0	0	0	0	0	0	0	0	0	0	110	0	20.056	2.7	2.8	9.5	3.4	3.2	1.2	2.4	3.4	0	237850000	162460000	1319500000	573270000	318550000	155370000	66387000	1.80102e+08	192600000	175400000	0	1.22667e+08	1.46823
Q15154;A0A4W8VX11;E7EV93;E5RGQ4;E9PGW9;H0YBA1	Pericentriolar material 1 protein	PCM1			6	23	15	7	10	10	5	4	2	4	8	1	0	0	0	0	0	0	0	0	228.54	0	188.71	10.5	4.7	6.6	6.3	3.3	2.1	1.2	2.3	4.9	2434200000	1157800000	1809400000	1.80047e+09	1889900000	335400000	379530000	8.68277e+08	105390000	362660000	927610000	465220000	1.86638
Q53EL6;Q5VZS7	Programmed cell death protein 4	PDCD4			2	5	0	4	1	0	1	1	0	2	0	0	4	1	0	1	1	0	2	0	51.735	0	20.79	0	16.4	2.3	0	3.6	2.3	0	8.1	0	0	535540000	155290000	2.30277e+08	0	33706000	76756000	3.68207e+07	0	262890000	0	87630000	0.420183
E9PQG4;A0A087WX83;A0A075B749;Q5VU43;H0YCH7	Myomegalin	PDE4DIP			5	4	2	2	2	1	1	0	1	1	1	2	2	2	1	1	0	1	1	1	85.353	0	16.133	3.8	3.8	3.6	1.6	2	0	1.6	1.6	2	231270000	587490000	250820000	3.56527e+08	66127000	0	0	2.20423e+07	57613000	224510000	121190000	1.34438e+08	0.16396
Q14554;C9JY10	Protein disulfide-isomerase A5	PDIA5			2	4	1	4	0	1	2	0	2	4	0	1	4	0	1	2	0	2	4	0	59.594	0	9.4908	1.9	8.9	0	1.9	3.9	0	3.9	8.9	0	86544000	374680000	0	1.53741e+08	83142000	101640000	0	61594000	36683000	163930000	0	66871000	0.921087
Q9NR12	PDZ and LIM domain protein 7	PDLIM7			1	4	2	3	1	1	2	0	2	0	0	2	3	1	1	2	0	2	0	0	49.844	0	8.6634	5.3	7.9	2.4	2.8	11.2	0	5.3	0	0	262840000	344260000	119880000	2.42327e+08	129760000	61420000	0	6.37267e+07	226450000	0	0	7.54833e+07	0.844248
Q8NCN5;A8MT40;H3BQG3;H3BUH3;B7ZAR9	Pyruvate dehydrogenase phosphatase regulatory subunit, mitochondrial	PDPR			5	8	4	0	1	6	3	1	3	1	0	4	0	1	6	3	1	3	1	0	99.363	0	25.761	6.3	0	1.5	8.4	4.2	0.8	4.4	1.5	0	821800000	0	88709000	303503000	2879100000	209820000	62930000	1.05062e+09	335290000	84462000	0	1.39917e+08	7.50884
H3BND4;Q6P996;Q86XE2;Q6XYB5;Q6P474;J3KNK7;H3BNL6	Pyridoxal-dependent decarboxylase domain-containing protein 1	PDXDC1			7	14	1	9	8	1	1	3	0	3	1	1	9	8	1	1	3	0	3	1	88.761	0	61.467	2	20.2	12.2	1.6	1.6	4	0	4.8	1.6	66572000	1450700000	844920000	7.87397e+08	131670000	121520000	421140000	2.24777e+08	0	621680000	228360000	2.83347e+08	0.793292
O15067;J3KTQ5;J3QSG0;J3QSH6;H0YGH1	Phosphoribosylformylglycinamidine synthase	PFAS			5	3	1	1	1	1	0	0	1	0	0	1	1	1	1	0	0	1	0	0	144.73	0	5.5049	1.2	1.2	0.7	1.2	0	0	0.9	0	0	102590000	57469000	54747000	71602000	62379000	0	0	20793000	32404000	0	0	1.08013e+07	1.92504
A0A3B3ITK7;P36871	Phosphoglucomutase-1	PGM1			2	9	6	3	3	3	0	3	2	2	3	6	3	3	3	0	3	2	2	3	63.957	0	51.201	12.3	8.9	7.4	7.4	0	7.4	4.6	4.6	7.2	672030000	317950000	204770000	398250000	424080000	0	214420000	2.12833e+08	290740000	138230000	78184000	1.69051e+08	1.25899
Q93100;I3L3F2;H3BV13;I3NHZ9;I3L213;H3BQ89	Phosphorylase b kinase regulatory subunit beta	PHKB			6	3	0	2	1	1	0	0	0	0	1	0	2	1	1	0	0	0	0	1	124.88	0	12.562	0	3.8	1.6	0.8	0	0	0	0	1.6	0	165610000	54119000	73243000	0	0	0	0	0	0	47323000	1.57743e+07	0
O00443;A0A0C4DGF9;E9PPP3	Phosphatidylinositol 4-phosphate 3-kinase C2 domain-containing subunit alpha	PIK3C2A			3	14	6	2	7	7	3	3	1	4	6	6	2	7	7	3	3	1	4	6	190.68	0	38.384	5	2.1	5.8	6.2	2.3	2.6	0.8	3.4	3.9	878590000	244140000	813930000	6.45553e+08	1255300000	121830000	168920000	515350000	113770000	367440000	479110000	3.20107e+08	1.60993
Q13835	Plakophilin-1	PKP1			1	5	1	0	3	1	0	4	0	0	3	1	0	3	1	0	4	0	0	3	82.86	0	44.782	2	0	5.6	2	0	6.6	0	0	5.5	145010000	0	507840000	2.17617e+08	124300000	0	329190000	1.51163e+08	0	0	286310000	9.54367e+07	1.58391
O14939;I3L381	Phospholipase D2	PLD2			2	3	1	1	1	0	0	1	0	1	0	1	1	1	0	0	1	0	1	0	105.99	0.00091213	3.4427	0.8	0.8	1.5	0	0	1.5	0	0.8	0	2078900000	42210000	67914000	7.29675e+08	0	0	40670000	1.35567e+07	0	27762000	0	9254000	1.46495
Q8TCS8	Polyribonucleotide nucleotidyltransferase 1, mitochondrial	PNPT1			1	3	0	3	0	0	1	0	0	1	0	0	3	0	0	1	0	0	1	0	85.95	0.0014775	3.0614	0	3.8	0	0	0.9	0	0	0.9	0	0	242000000	0	8.06667e+07	0	16911000	0	5637000	0	31821000	0	10607000	0.531442
Q15054;E9PM91;E9PNC0;E9PRK3	DNA polymerase delta subunit 3	POLD3			4	3	2	1	3	2	0	2	1	2	1	2	1	3	2	0	2	1	2	1	51.4	0	13.505	5.8	2.8	8.4	5.8	0	5.8	2.8	5.4	2.8	243050000	95625000	692060000	3.43578e+08	174630000	0	104590000	9.30733e+07	112880000	108720000	86417000	1.02672e+08	0.906508
Q9H9Y6;H7C0D9	DNA-directed RNA polymerase I subunit RPA2	POLR1B			2	5	0	0	1	1	0	1	0	0	3	0	0	1	1	0	1	0	0	3	128.23	0	12.426	0	0	1.2	1.4	0	1.2	0	0	3.1	0	0	142530000	47510000	79632000	0	147280000	7.56373e+07	0	0	64076000	2.13587e+07	3.54129
Q9Y570	Protein phosphatase methylesterase 1	PPME1			1	9	1	6	4	1	3	3	1	2	3	1	6	4	1	3	3	1	2	3	42.315	0	35.926	2.8	25.9	16.1	2.8	9.1	8.3	3.6	9.6	8.3	197980000	854340000	394570000	4.82297e+08	155100000	205380000	255180000	205220000	43966000	167740000	466060000	225922000	0.908367
A0A3B3ISJ2;Q96KQ4;H0YJL1	Apoptosis-stimulating of p53 protein 1	PPP1R13B			3	2	0	0	2	0	0	0	0	0	0	0	0	2	0	0	0	0	0	0	117.81	0.00032415	4.5082	0	0	2.8	0	0	0	0	0	0	0	0	67195000	2.23983e+07	0	0	0	0	0	0	0	0	#DIV/0!
E9PFR3;Q14738;H0Y8C4;H7C5Q9;Q96B13;H0YJ75;Q13362;H0YJ35;H0YN84;Q16537;Q15173	Serine/threonine-protein phosphatase 2A 56 kDa regulatory subunit delta isoform	PPP2R5D			11	10	2	5	4	0	4	1	3	2	3	2	5	4	0	4	1	3	2	3	69.116	0	47.405	6.7	11.8	10.6	0	11.4	1.2	6.6	6.2	7.9	248510000	851030000	645720000	5.81753e+08	0	398490000	0	132830000	245790000	302140000	324110000	290680000	0.456963
Q9BZL6;M0QXC6;H0Y5M6;A0A5H1ZRP5;C9JDA4;A0A1B0GTX4;J3KNE8;E7ET86;A0A096LNR9;A0A1B0GUM4;F8WBA3;A0A669KBC2;Q00532;Q92772;Q8IVW4;O94806;Q15139;O76039;Q9NRP7	Serine/threonine-protein kinase D2	PRKD2			19	6	4	4	1	2	1	0	2	3	1	4	4	1	2	1	0	2	3	1	96.721	0	45.918	7.4	6.8	2.4	3.5	1.7	0	3.5	4.4	1.8	384890000	449610000	91332000	3.08611e+08	148640000	169140000	0	1.05927e+08	90869000	221370000	109250000	1.40496e+08	0.753946
P11908;D3YTJ7;A6NMS2	Ribose-phosphate pyrophosphokinase 2	PRPS2			3	3	1	2	1	1	1	1	0	1	0	0	2	0	0	1	0	0	1	0	34.769	0	19.42	11.3	29.9	13.5	8.2	20.8	11.3	3.8	21.1	6.9	100420000	232910000	245970000	193100000	72985000	103040000	0	58675000	0	97030000	0	3.23433e+07	1.81413
P28066	Proteasome subunit alpha type-5	PSMA5			1	6	2	4	2	3	2	1	4	3	2	2	4	2	3	2	1	4	3	2	26.411	0	22.681	8.3	22	8.3	13.3	7.1	2.9	19.5	14.1	7.9	456910000	1390400000	506540000	7.84617e+08	558520000	166770000	140960000	288750000	594720000	349100000	220170000	3.87997e+08	0.744207
J3KN29;O00233;F5H169;F5H5V4;F5GX23	26S proteasome non-ATPase regulatory subunit 9	PSMD9			5	3	1	3	0	0	1	0	0	2	0	1	3	0	0	1	0	0	2	0	24.553	0	5.283	5.4	16.2	0	0	5.4	0	0	10.8	0	61001000	405550000	0	155517000	0	70486000	0	2.34953e+07	0	167470000	0	5.58233e+07	0.420887
Q12923	Tyrosine-protein phosphatase non-receptor type 13	PTPN13			1	3	1	0	2	0	0	0	0	0	0	1	0	2	0	0	0	0	0	0	276.9	0.00032248	4.3833	0.5	0	1.3	0	0	0	0	0	0	138790000	0	208400000	115730000	0	0	0	0	0	0	0	0	#DIV/0!
A0A0A0MQS1;Q53H96;B5MD87	Pyrroline-5-carboxylate reductase 3	PYCR3			3	4	4	2	1	2	1	1	1	1	2	4	2	1	2	1	1	1	1	2	29.892	0	17.626	20.6	12.2	3.8	8.4	4.5	3.8	4.5	4.5	10.1	916380000	159600000	375320000	4.83767e+08	581350000	69222000	207080000	285884000	147310000	138820000	305990000	1.97373e+08	1.44844
Q6ZRP7;H0Y430	Sulfhydryl oxidase 2	QSOX2			2	2	2	0	0	0	0	0	0	0	0	2	0	0	0	0	0	0	0	0	77.528	0	6.2859	3.4	0	0	0	0	0	0	0	0	203660000	0	0	6.78867e+07	0	0	0	0	0	0	0	0	#DIV/0!
Q13637;P57729;H0YEA4	Ras-related protein Rab-32	RAB32			3	4	2	2	1	1	1	2	0	1	1	1	1	0	1	0	1	0	0	0	24.997	0	12.214	14.2	16.4	4.9	9.3	4.9	9.3	0	4.9	4.9	107280000	172250000	54579000	1.1137e+08	61253000	0	161480000	7.42443e+07	0	0	123320000	4.11067e+07	1.80614
Q9UJF2;H0Y638	Ras GTPase-activating protein nGAP	RASAL2			2	3	2	1	2	0	1	0	0	1	1	2	1	2	0	1	0	0	1	1	128.56	0	10.063	2.3	1.4	2.3	0	1.1	0	0	1.1	1.1	128670000	87864000	188720000	1.35085e+08	0	0	0	0	0	40082000	33976000	24686000	0
Q9HCJ3;E9PE10	Ribonucleoprotein PTB-binding 2	RAVER2			2	2	0	1	0	0	1	0	0	2	0	0	1	0	0	1	0	0	2	0	74.338	0	5.3344	0	3.3	0	0	3.3	0	0	4.9	0	0	277710000	0	92570000	0	198220000	0	6.60733e+07	0	122260000	0	4.07533e+07	1.6213
P22670	MHC class II regulatory factor RFX1	RFX1			1	2	1	0	2	2	0	1	0	0	2	1	0	2	2	0	1	0	0	2	104.76	0	13.657	1.3	0	4.2	4.2	0	1.3	0	0	4.2	400230000	0	325030000	2.41753e+08	120010000	0	0	4.00033e+07	0	0	224370000	74790000	0.534875
Q6R327	Rapamycin-insensitive companion of mTOR	RICTOR			1	8	6	2	2	2	1	0	2	3	0	6	2	2	2	1	0	2	3	0	192.22	0	33.684	5.2	1.6	1.6	1.3	1.3	0	1.9	1.8	0	559360000	99668000	143000000	2.67343e+08	198520000	35544000	0	7.80213e+07	148340000	191870000	0	1.13403e+08	0.687999
A0A096LNV3;A0A096LP02;Q9Y508;A0A096LNT1;A0A096LNN8;A0A096LPF9	E3 ubiquitin-protein ligase RNF114	RNF114			6	2	1	1	2	1	0	1	0	0	1	1	1	2	1	0	1	0	0	1	20.885	0	16.45	10.6	10.6	17.6	10.6	0	10.6	0	0	10.6	91566000	0	169700000	8.70887e+07	82105000	0	69576000	5.05603e+07	0	0	79511000	2.65037e+07	1.90767
H0YKX0;Q96EP0;H0YKI4;A0A0B4J293;H0YMG4	E3 ubiquitin-protein ligase RNF31	RNF31			5	2	0	0	2	0	0	0	0	0	0	0	0	2	0	0	0	0	0	0	102.29	0	31.509	0	0	3.7	0	0	0	0	0	0	0	0	172060000	5.73533e+07	0	0	0	0	0	0	0	0	#DIV/0!
Q5JYR7;Q5JYR4;F2Z3K5	Dolichyl-diphosphooligosaccharide--protein glycosyltransferase subunit 2	RPN2			3	2	0	0	1	1	0	0	0	0	0	0	0	1	1	0	0	0	0	0	37.109	0.0086091	2.0545	9.9	32.3	10.2	12.5	25.3	21.5	23.3	32.3	9.9	0	0	74417000	2.48057e+07	0	0	0	0	0	0	0	0	#DIV/0!
Q9BST9	Rhotekin	RTKN			1	5	3	1	2	1	1	1	1	1	2	3	1	2	1	1	1	1	1	2	62.667	0	58.213	10.3	3.2	7.6	3.2	1.2	1.4	3.2	3.2	7.6	357180000	63066000	426230000	2.82159e+08	194420000	77517000	128810000	1.33582e+08	102090000	104310000	138370000	1.14923e+08	1.16236
P26447	Protein S100-A4	S100A4			1	4	1	2	2	0	1	1	0	0	1	1	2	2	0	1	1	0	0	1	11.728	0	6.3791	7.9	19.8	8.9	0	8.9	7.9	0	0	7.9	0	206060000	190540000	132200000	0	24865000	137770000	5.42117e+07	0	0	96042000	32014000	1.69337
A0A0G2JPP5;A0A669KAX5	Protein scribble homolog	SCRIB			2	66	22	23	56	23	19	48	21	19	30	0	0	2	0	0	0	0	0	0	177.72	0	323.31	18.6	19	42.3	19.2	16.3	39	17.5	17.6	25.9	5117400000	5689800000	32380000000	1.43957e+10	6536200000	6951000000	17750000000	10412400000	5006500000	4585800000	9251500000	6.28127e+09	1.65769
Q12765	Secernin-1	SCRN1			1	2	0	2	0	0	0	0	0	0	0	0	2	0	0	0	0	0	0	0	46.382	0.00033113	4.8583	0	7.2	0	0	0	0	0	0	0	0	124300000	0	4.14333e+07	0	0	0	0	0	0	0	0	#DIV/0!
F8VSC5;A0A0U1RQQ9;Q6P3W7;H0YIK6	SCY1-like protein 2	SCYL2			4	3	1	0	2	0	0	0	0	1	0	1	0	2	0	0	0	0	1	0	77.053	0	5.5637	2.3	0	4.3	0	0	0	0	2.3	0	99724000	0	133510000	7.77447e+07	0	0	0	0	0	110680000	0	3.68933e+07	0
P21912;A0A087WXX8;A0A087WWT1	Succinate dehydrogenase [ubiquinone] iron-sulfur subunit, mitochondrial	SDHB			3	3	2	3	2	3	1	2	3	0	1	2	3	2	3	1	2	3	0	1	31.629	0	8.812	7.1	12.1	7.1	12.1	5	7.1	12.1	0	3.9	307090000	423930000	198330000	3.09783e+08	221240000	0	119710000	113650000	358380000	0	75662000	1.44681e+08	0.785523
O95486;H0Y9J6	Protein transport protein Sec24A	SEC24A			2	7	4	2	1	4	3	0	2	2	1	4	2	1	4	3	0	2	2	1	119.75	0	21.259	5.6	2.8	0.7	4.7	4.9	0	2.9	2.9	1.4	781720000	147020000	50514000	326418000	507620000	27411000	0	1.78344e+08	120260000	361100000	0	1.60453e+08	1.1115
D6REX3;O94979;H7BXG7;D6RHZ5;H0Y8W8;H0YAB3;H0Y9T9;H0Y8V7;H0Y9K1;H0YAF5;D6RBT0;D6RHE8;D6RE64;D6RCQ9	Protein transport protein Sec31A	SEC31A			14	19	9	8	2	7	6	1	1	7	4	9	8	2	7	6	1	1	7	4	136.22	0	118.47	9.5	8.2	2.2	8.3	5	1.1	1.1	7.1	4.3	1655800000	847120000	281280000	9.28067e+08	1485500000	313890000	62767000	620719000	101740000	1036700000	128790000	422410000	1.46947
Q9H4L4;A0A087WV50;J3QL36;A0A087X0R7;J3KSF5;J3QRE4	Sentrin-specific protease 3	SENP3			6	4	1	0	4	0	0	2	0	0	1	1	0	4	0	0	2	0	0	1	65.009	0	16.783	2.8	0	7.8	0	0	5.9	0	0	3.5	26780000	0	295070000	1.07283e+08	0	0	36720000	12240000	0	0	76538000	2.55127e+07	0.479762
P30740	Leukocyte elastase inhibitor	SERPINB1			1	5	2	4	1	2	2	2	1	1	1	2	4	1	2	2	2	1	1	1	42.741	0	24.631	6.6	15.3	2.9	5.8	6.6	6.6	2.9	2.9	2.9	796690000	869820000	228120000	6.31543e+08	394060000	442840000	241880000	3.59593e+08	162800000	314310000	171720000	2.16277e+08	1.66265
O15047	Histone-lysine N-methyltransferase SETD1A	SETD1A			1	8	4	1	2	3	1	0	3	0	2	4	1	2	3	1	0	3	0	2	186.03	0	29.376	4	0.8	1.8	2.4	0.8	0	2.5	0	1.8	429870000	60631000	150050000	213517000	314810000	87292000	0	134034000	176870000	0	138350000	1.05073e+08	1.27562
Q15427;Q5SZ64	Splicing factor 3B subunit 4	SF3B4			2	2	1	2	0	1	1	0	0	1	0	1	2	0	1	1	0	0	1	0	44.385	0	7.4399	3.3	9	0	3.3	3.3	0	0	3.3	0	74696000	201400000	0	92032000	94247000	54058000	0	49435000	0	90779000	0	3.02597e+07	1.63369
Q9P0V3	SH3 domain-binding protein 4	SH3BP4			1	9	5	0	5	5	0	4	1	1	3	5	0	5	5	0	4	1	1	3	107.49	0	34.316	8.3	0	7.1	7.7	0	6.2	2	2	4.9	426130000	0	1939100000	788410000	811640000	0	575100000	4.62247e+08	139750000	151090000	417680000	2.36173e+08	1.95723
Q15477;F8WDE8;H7C5N0;H7C4L3;B4E0B4	Helicase SKI2W	SKIV2L			5	6	2	4	2	1	1	1	0	1	3	2	4	2	1	1	1	0	1	3	137.75	0	9.3512	2.2	4.1	2.2	1	1.1	1	0	1	3.3	405620000	238240000	168210000	270690000	74817000	100790000	127440000	1.01016e+08	0	64326000	284500000	1.16275e+08	0.868763
Q92504;A2AAT0	Zinc transporter SLC39A7	SLC39A7			2	2	2	1	1	2	1	2	1	1	1	2	1	1	2	1	2	1	1	1	50.117	0	53.232	5.8	3	3	5.8	3	5.8	3	3	3	857460000	471590000	329120000	5.52723e+08	910020000	143280000	142300000	3.98533e+08	258440000	209590000	293080000	2.53703e+08	1.57086
Q9H2G2	STE20-like serine/threonine-protein kinase	SLK			1	9	4	7	1	3	1	0	2	5	1	4	7	1	3	1	0	2	5	1	142.69	0	37.17	4.4	6.7	1.1	2.9	1.1	0.7	2.8	6.2	1.1	440870000	1403400000	338210000	7.27493e+08	359870000	62250000	0	1.40707e+08	291440000	511500000	60415000	287785000	0.48893
M0QYR1;P08621;M0QX04	U1 small nuclear ribonucleoprotein 70 kDa	SNRNP70			3	3	0	3	1	0	0	0	0	1	0	0	3	1	0	0	0	0	1	0	11.476	0.00032873	4.7064	0	30.9	10.6	0	0	0	0	10.6	0	0	357270000	44973000	134081000	0	0	0	0	0	84884000	0	2.82947e+07	0
Q9BX66;S4R406;S4R303	Sorbin and SH3 domain-containing protein 1	SORBS1			3	6	0	0	6	0	0	1	0	0	0	0	0	5	0	0	1	0	0	0	142.51	0	27.57	0	0	6.5	0	0	1.1	0	0	0	0	0	767820000	255940000	0	0	0	0	0	0	0	0	#DIV/0!
Q53LP3	Ankyrin repeat domain-containing protein SOWAHC	SOWAHC			1	2	1	2	1	0	0	0	0	1	1	1	2	1	0	0	0	0	1	1	55.671	0.00091019	3.4189	3.2	5.7	3.2	0	0	0	0	3.2	3.2	0	152400000	18313000	5.69043e+07	0	0	0	0	0	16149000	22209000	12786000	0
O60248	Protein SOX-15	SOX15			1	5	1	2	0	3	0	0	0	1	0	1	2	0	3	0	0	0	1	0	25.251	0	27.811	6.4	18.9	0	19.3	0	0	0	6.4	0	75549000	211440000	0	95663000	130070000	0	0	4.33567e+07	0	82411000	0	2.74703e+07	1.57831
Q9UM82	Spermatogenesis-associated protein 2	SPATA2			1	2	0	0	2	0	0	0	0	0	0	0	0	2	0	0	0	0	0	0	58.427	0	6.0333	0	0	5.2	0	0	0	0	0	0	0	0	125350000	4.17833e+07	0	0	0	0	0	0	0	0	#DIV/0!
C9J0K6;P30626;B4DHQ6	Sorcin	SRI			3	3	0	2	1	0	0	2	0	0	1	0	2	1	0	0	2	0	0	1	17.605	0	5.2037	0	12.9	7.7	0	0	12.9	0	0	7.7	0	224890000	40936000	8.86087e+07	0	0	99069000	33023000	0	0	59397000	19799000	1.66791
Q08170;A0A0D9SEM4	Serine/arginine-rich splicing factor 4	SRSF4			2	4	1	1	1	1	1	0	1	0	0	1	1	1	1	1	0	1	0	0	56.678	0	12.186	6.3	4	5.1	4.7	4	1.8	4	1.8	0	63906000	55666000	68688000	6.27533e+07	0	82700000	0	2.75667e+07	50502000	0	0	16834000	1.63756
C9JK83;O95630	STAM-binding protein	STAMBP			2	2	1	1	1	0	1	0	0	0	1	1	1	1	0	1	0	0	0	1	36.156	0.0020208	2.7638	4.7	6.3	4.7	0	4.7	0	0	0	4.7	130450000	100830000	0	7.70933e+07	0	0	0	0	0	0	0	0	#DIV/0!
B4DR80;H0Y630;Q9Y6E0;C9JDH9;C9J6L2;C9JCC0;C9J232;H7C279;O00506	Serine/threonine-protein kinase 24	STK24			9	2	0	2	1	0	2	1	0	0	1	0	2	1	0	2	1	0	0	1	45.835	0	9.8399	1.7	16.7	8	1.7	15	8.3	4.4	8.5	5.6	0	566300000	144070000	236790000	0	398760000	194920000	1.97893e+08	0	0	336250000	1.12083e+08	1.76559
Q13188;E5RFQ9;A0A087WZ06	Serine/threonine-protein kinase 3	STK3			3	6	1	4	1	2	0	0	0	1	1	1	1	1	1	0	0	0	0	1	56.3	0	17.115	2	13.2	2	5.1	0	0	0	3.5	2.4	176400000	234600000	78696000	163232000	254260000	0	0	8.47533e+07	0	67666000	73155000	4.69403e+07	1.80555
A0A6I8PIX7;O95425	Supervillin	SVIL			2	2	0	0	1	0	0	1	0	0	1	0	0	1	0	0	1	0	0	1	213.63	0	11.355	0	0	0.9	0	0	0.9	0	0	0.9	0	0	118350000	39450000	0	0	69574000	2.31913e+07	0	0	56676000	18892000	1.22757
Q96C24	Synaptotagmin-like protein 4	SYTL4			1	22	3	4	15	3	1	13	4	4	10	3	4	15	3	1	13	4	4	10	76.023	0	146.4	6.4	5.5	24.4	6.7	1.2	25	7.6	5.8	19.1	547930000	389640000	7467800000	2801790000	629050000	35549000	2744900000	1.1365e+09	266740000	357810000	3260700000	1.29508e+09	0.877549
Q9BSH4	Translational activator of cytochrome c oxidase 1	TACO1			1	4	1	3	0	0	2	1	1	2	0	1	3	0	0	2	1	1	2	0	32.477	0	9.5124	6.7	17.5	0	0	10.8	4	6.1	10.1	0	177190000	481390000	0	2.19527e+08	0	348730000	76484000	141738000	148490000	175900000	0	108130000	1.31081
Q9C0D5	Protein TANC1	TANC1			1	25	10	5	23	7	3	10	0	2	12	10	5	23	7	3	10	0	2	12	202.22	0	67.75	7.6	3.8	17.2	5.3	1.9	7.1	0	1.3	9.4	1007500000	748190000	4163600000	1.9731e+09	491660000	103890000	781720000	459090000	0	267470000	1158200000	4.75223e+08	0.966051
Q9HCD6;J3QQY7;J3KTM5;J3KRP9	Protein TANC2	TANC2			4	8	2	0	6	1	1	1	0	1	0	2	0	6	1	1	1	0	1	0	219.65	0	46.049	1.4	0	3.9	0.7	0.7	0.7	0	0.7	0	175000000	0	431580000	2.02193e+08	0	0	85704000	28568000	0	42908000	0	1.43027e+07	1.99739
Q9UL54	Serine/threonine-protein kinase TAO2	TAOK2			1	3	0	2	0	0	1	0	1	1	0	0	2	0	0	1	0	1	1	0	138.25	0.00032787	4.6731	0	1.8	0	0	1.1	0	0.9	0.9	0	0	246580000	0	8.21933e+07	0	28818000	0	9606000	66491000	44271000	0	3.69207e+07	0.260179
A0A0A0MRY0;Q8WUA7;F8WDP1;B0QYI1	TBC1 domain family member 22A	TBC1D22A			4	2	0	2	1	1	1	0	0	1	0	0	2	1	1	1	0	0	1	0	55.804	0	6.837	0	7	4.5	4.5	4.5	0	0	4.5	0	0	228520000	0	7.61733e+07	69345000	38993000	0	3.61127e+07	0	81894000	0	27298000	1.32291
H3BRS3;Q9Y4R8	Telomere length regulation protein TEL2 homolog	TELO2			2	3	1	1	0	0	0	0	0	1	0	1	1	0	0	0	0	0	1	0	47.38	0	8.6185	2.6	4.9	0	0	0	0	0	2.6	0	37298000	109410000	0	4.89027e+07	0	0	0	0	0	33507000	0	11169000	0
Q9Y5L4;K7EIT2	Mitochondrial import inner membrane translocase subunit Tim13	TIMM13			2	2	1	2	0	2	0	0	2	0	0	1	2	0	2	0	0	2	0	0	10.5	0.00032362	4.4939	16.8	31.6	0	31.6	0	0	31.6	0	0	39912000	268510000	0	1.02807e+08	263920000	0	0	8.79733e+07	153300000	0	0	51100000	1.72159
O95049	Tight junction protein ZO-3	TJP3			1	5	5	3	4	2	0	1	0	2	0	5	3	4	2	0	1	0	2	0	101.4	0	15.164	6.6	4.5	5.3	2.9	0	1.5	0	2.8	0	280950000	234310000	275450000	263570000	149060000	0	27164000	5.87413e+07	0	109250000	0	3.64167e+07	1.61303
Q8WUH6	Transmembrane protein 263	TMEM263			1	3	3	3	3	2	0	2	0	2	1	3	3	3	2	0	2	0	2	1	11.748	0	11.16	44	44	44	21.6	0	31	0	35.3	8.6	637880000	738820000	782330000	7.19677e+08	465520000	0	200520000	2.22013e+08	0	405330000	102200000	1.69177e+08	1.31232
Q13470;U3KPR9;I3L334	Non-receptor tyrosine-protein kinase TNK1	TNK1			3	10	0	0	9	0	0	2	0	0	3	0	0	9	0	0	2	0	0	3	72.467	0	23.957	0	0	16.4	0	0	2.6	0	0	3.8	0	0	2391200000	7.97067e+08	0	0	231110000	7.70367e+07	0	0	541760000	1.80587e+08	0.426591
Q68CZ2;E9PCX8;C9JWN9;C9JTD0;C9JHU5;H0Y4U1;F8VV64;A0A087WWW7;E9PGF5;E9PF55;A0A494C067;A0A2R8Y4T1;Q63HR2;Q9HBL0	Tensin-3	TNS3			14	9	3	8	3	2	4	1	0	5	1	3	8	3	2	4	1	0	5	1	155.26	0	58.127	3.9	10.6	3.3	2.4	5.2	1	0	6.2	1	353910000	1035300000	388190000	5.92467e+08	165940000	279350000	96952000	1.80747e+08	0	470280000	0	156760000	1.15302
Q15785	Mitochondrial import receptor subunit TOM34	TOMM34			1	4	1	4	0	1	0	1	0	2	0	1	4	0	1	0	1	0	2	0	34.559	0	20.751	5.8	19.1	0	5.8	0	5.8	0	10.7	0	49124000	448960000	0	166028000	57798000	0	79634000	4.58107e+07	0	233870000	0	7.79567e+07	0.587643
Q5W0H4;A0A0B4J2C3;P13693;J3KPG2;E9PJF7;Q9HAU6;Q56UQ5;H0YCX0	Translationally-controlled tumor protein	TPT1			8	7	6	4	2	3	1	0	5	2	1	6	4	2	3	1	0	5	2	1	21.525	0	32.151	26.6	23.4	11.2	19.1	3.7	0	27.1	14.4	6.9	4906300000	874040000	2478000000	2752780000	930300000	43246000	0	3.24515e+08	1385600000	264360000	83635000	577865000	0.561576
Q12933;B1AMX8;B1AMY1;B1AMX7	TNF receptor-associated factor 2	TRAF2			4	4	3	1	2	0	1	0	1	2	0	3	1	2	0	1	0	1	2	0	55.859	0	29.309	8	2	6	0	2.6	0	2	3.6	0	267110000	110140000	233420000	2.03557e+08	0	0	0	0	76708000	145000000	0	7.39027e+07	0
H3BR17;Q6Q0C0;A0A087WUB0	E3 ubiquitin-protein ligase TRAF7	TRAF7			3	2	1	0	2	1	0	0	0	0	1	1	0	2	1	0	0	0	0	1	15.87	0	44.475	16.3	0	28.6	16.3	0	0	0	0	16.3	67887000	0	279190000	1.15692e+08	178430000	0	0	5.94767e+07	0	0	92055000	30685000	1.9383
O14545;F8VNX8;F8VVF3;F8VWK2	TRAF-type zinc finger domain-containing protein 1	TRAFD1			4	6	2	5	3	1	3	1	2	3	1	2	5	3	1	3	1	2	3	1	64.84	0	17.614	5.2	11.5	7.4	2.1	5.7	2.1	5.2	7	2.1	211260000	539630000	626480000	4.59123e+08	54400000	104790000	94820000	84670000	107100000	220530000	69991000	1.3254e+08	0.638824
Q96LD4	E3 ubiquitin-protein ligase TRIM47	TRIM47			1	3	0	3	0	1	0	0	1	1	0	0	3	0	1	0	0	1	1	0	69.531	0	7.3549	0	6.3	0	2.4	0	0	2.4	1.9	0	0	272890000	0	9.09633e+07	0	0	0	0	0	43158000	0	14386000	0
F5GX77;Q9UI30;F5GYQ2	Multifunctional methyltransferase subunit TRM112-like protein	TRMT112			3	3	1	3	1	0	1	0	1	1	0	1	3	1	0	1	0	1	1	0	11.972	0	9.6481	12.3	36.8	12.3	0	11.3	0	11.3	13.2	0	0	572790000	0	190930000	0	61715000	0	2.05717e+07	50184000	207330000	0	85838000	0.239657
O95801	Tetratricopeptide repeat protein 4	TTC4			1	2	0	1	1	0	0	0	0	1	0	0	1	1	0	0	0	0	1	0	44.678	0.0078484	2.111	0	2.8	2.8	0	0	0	0	2.8	0	0	35102000	51043000	28715000	0	0	0	0	0	40417000	0	1.34723e+07	0
G5E9G4;Q9ULT0;H0Y3V7;H7C055	Tetratricopeptide repeat domain 7A	TTC7A			4	2	0	2	0	0	1	0	0	1	0	0	2	0	0	1	0	0	1	0	92.739	0	6.2126	0	2.4	0	0	1.3	0	0	1.1	0	0	103190000	0	3.43967e+07	0	31775000	0	1.05917e+07	0	16164000	0	5388000	1.96579
F2Z2B9;Q9BSJ2;R4GMM4	Gamma-tubulin complex component 2	TUBGCP2			3	7	1	3	3	2	0	4	0	2	2	1	3	3	2	0	4	0	2	2	82.603	0	66.365	2.5	5.5	5.4	4.4	0	6.9	0	4	3.7	82342000	370300000	491180000	3.14607e+08	202570000	0	322720000	1.75097e+08	0	197140000	197640000	1.31593e+08	1.33059
P40222	Alpha-taxilin	TXLNA			1	8	0	6	0	0	1	0	1	5	0	0	6	0	0	1	0	1	5	0	61.89	0	18.675	0	14.7	0	0	2.9	0	2.9	11.7	0	0	1599400000	0	5.33133e+08	0	119150000	0	3.97167e+07	144790000	575710000	0	2.40167e+08	0.165371
P68036;A0A1B0GUS4	Ubiquitin-conjugating enzyme E2 L3	UBE2L3			2	6	2	3	3	1	0	3	1	1	0	2	3	3	1	0	3	1	1	0	17.861	0	28.849	11	39	20.8	5.8	0	26.6	17.5	9.7	0	169060000	1135000000	578310000	6.27457e+08	134900000	0	479200000	204700000	243970000	115120000	0	1.19697e+08	1.71016
P61088;F8VQQ8;F8VSD4;F8VV71;F8VZ29;Q5JXB2	Ubiquitin-conjugating enzyme E2 N	UBE2N			6	4	1	3	0	1	2	1	2	2	0	1	3	0	1	2	1	2	2	0	17.138	0	11.505	4.6	25.7	0	4.6	18.4	4.6	11.8	19.7	0	93435000	820580000	0	3.04672e+08	72060000	131770000	45938000	83256000	156720000	297630000	0	151450000	0.549726
Q9H832;I3L4C5;D6RB11	Ubiquitin-conjugating enzyme E2 Z	UBE2Z			3	4	0	2	1	0	1	1	0	0	1	0	2	1	0	1	1	0	0	1	38.21	0	5.6814	0	6.5	2	0	4.5	2	0	0	2	0	179790000	56813000	7.88677e+07	0	40698000	46284000	28994000	0	0	90281000	3.00937e+07	0.963459
Q15386	Ubiquitin-protein ligase E3C	UBE3C			1	3	0	1	3	0	0	1	0	0	2	0	1	3	0	0	1	0	0	2	123.92	0	25.855	0	1	4.2	0	0	2.1	0	0	3.1	0	90182000	352090000	147424000	0	0	63330000	21110000	0	0	143730000	47910000	0.440618
O95155;K7EP75	Ubiquitin conjugation factor E4 B	UBE4B			2	4	0	2	1	0	2	0	0	1	0	0	2	1	0	2	0	0	1	0	146.18	0	10.514	0	1.8	1.5	0	2.3	0	0	0.6	0	0	91529000	237930000	1.0982e+08	0	61626000	0	20542000	0	33118000	0	1.10393e+07	1.8608
Q8IWV7	E3 ubiquitin-protein ligase UBR1	UBR1			1	3	2	0	1	1	0	0	1	0	0	2	0	1	1	0	0	1	0	0	200.21	0	5.4684	1.9	0	0.9	0.9	0	0	1.2	0	0	98565000	0	135130000	7.78983e+07	62633000	0	0	2.08777e+07	75157000	0	0	2.50523e+07	0.833362
Q8IWV8	E3 ubiquitin-protein ligase UBR2	UBR2			1	3	1	2	1	0	0	0	0	1	1	1	2	1	0	0	0	0	1	1	200.54	0	10.913	0.5	2.3	0.5	0	0	0	0	0.5	0.5	29707000	200530000	32093000	8.74433e+07	0	0	0	0	0	23859000	39331000	2.10633e+07	0
O94888;C9JAT7	UBX domain-containing protein 7	UBXN7			2	4	1	1	3	0	0	3	2	1	2	1	1	3	0	0	3	2	1	2	54.862	0	30.033	3.7	2.7	9.2	0	0	9.2	6.1	2.7	6.3	56427000	197180000	300750000	1.84786e+08	0	0	224990000	7.49967e+07	15713000	0	224950000	80221000	0.934876
A0A7I2YQ74;A0A087WYS1;E7EUC7;Q16851;C9JNZ1;A0A7I2V676;C9JVG3;C9JQU9;A0A7I2V4T0;C9JWG0;C9JTZ5;C9JUW1;A0A7I2V2Q3;F2Z3H1;C9J6Q0	UTP--glucose-1-phosphate uridylyltransferase	UGP2			15	9	5	7	2	5	0	0	4	3	0	5	7	2	5	0	0	4	3	0	51.695	0	96.272	14.3	22.4	5	16.1	0	0	12.2	9.6	0	1127500000	1765700000	189760000	1.02765e+09	865070000	0	0	2.88357e+08	708830000	472880000	0	3.93903e+08	0.732049
Q8IZJ1	Netrin receptor UNC5B	UNC5B			1	2	0	0	2	0	0	0	0	0	0	0	0	2	0	0	0	0	0	0	103.64	0	6.0035	0	0	3.9	0	0	0	0	0	0	0	0	75145000	2.50483e+07	0	0	0	0	0	0	0	0	#DIV/0!
K7EKZ1;Q8NFA0;K7EKK3;K7EII4;K7EQL6	Ubiquitin carboxyl-terminal hydrolase 32	USP32			5	2	0	0	2	0	0	0	0	0	0	0	0	2	0	0	0	0	0	0	96.903	0.0068231	2.1829	0	0	2.2	0	0	0	0	0	0	0	0	72604000	2.42013e+07	0	0	0	0	0	0	0	0	#DIV/0!
X6RAB3;Q92738	USP6 N-terminal-like protein	USP6NL			2	2	0	0	2	0	0	0	0	0	0	0	0	2	0	0	0	0	0	0	96.665	0	5.1399	0	0	3.4	0	0	0	0	0	0	0	0	254270000	8.47567e+07	0	0	0	0	0	0	0	0	#DIV/0!
Q93008;O00507;H7C2M9	Probable ubiquitin carboxyl-terminal hydrolase FAF-X	USP9X			3	12	1	8	6	0	4	2	0	2	3	1	8	6	0	4	2	0	2	3	290.46	0	61.584	0.5	3.9	2.9	0	2	0.8	0	0.9	1.2	0	911780000	526680000	4.79487e+08	0	146040000	129820000	9.19533e+07	0	41849000	149490000	6.37797e+07	1.44173
A0A087WXL6;Q9H270;A0A0G2JS92;B7Z879	Vacuolar protein sorting-associated protein 11 homolog	VPS11			4	3	0	1	2	0	0	0	0	0	1	0	1	2	0	0	0	0	0	1	107.81	0.00032552	4.5597	0	1.2	2.3	0	0	0	0	0	0.7	0	53869000	184330000	7.93997e+07	0	0	0	0	0	0	25675000	8.55833e+06	0
H3BV68;C9J7I2;F5H7K1;E7EWW0;Q7Z3J2	VPS35 endosomal protein-sorting factor-like	VPS35L			5	2	1	1	1	0	0	1	0	1	0	1	1	1	0	0	1	0	1	0	81.58	0.00063351	4.0522	1.5	1.4	1.5	0	0	1.5	0	1.4	0	44719000	38645000	83376000	55580000	0	0	49502000	1.65007e+07	0	30092000	0	1.00307e+07	1.64502
Q9UID3;H0YEE1	Vacuolar protein sorting-associated protein 51 homolog	VPS51			2	2	1	0	1	0	0	0	0	0	0	1	0	1	0	0	0	0	0	0	86.041	0	5.5091	1.9	0	1.2	0	0	0	0	0	0	79733000	0	24531000	3.47547e+07	0	0	0	0	0	0	0	0	#DIV/0!
Q8N1B4;A0A0G2JIG2	Vacuolar protein sorting-associated protein 52 homolog	VPS52			2	4	2	1	2	1	0	2	0	0	2	2	1	2	1	0	2	0	0	2	82.22	0	9.3398	4.6	2.9	4.6	2.9	0	5.4	0	0	4.4	293920000	164140000	352030000	270030000	275400000	0	250970000	1.75457e+08	0	0	354460000	1.18153e+08	1.48499
A0A7P0TAE0;A0A7P0Z400;A0A7P0T9B2;Q5VIR6;A0A7P0T8A5;A0A7P0TBK3;A0A7P0TA53;E7EVT8;A0A7P0T8V1;A0A7P0TA79;F6VX93;A0A7P0Z4K0;A0A7P0TAK4;A0A7P0Z461;A0A7P0T9V8;A0A7P0T874;A0A7P0T8P7	Vacuolar protein sorting-associated protein 53 homolog	VPS53			17	2	1	1	0	0	0	0	0	1	0	1	1	0	0	0	0	0	1	0	73.746	0.0068362	2.1925	2.3	2.3	0	0	0	0	0	2.3	0	88091000	65175000	0	5.10887e+07	0	0	0	0	0	49993000	0	1.66643e+07	0
Q6PJI9;H3BMH3;H3BV71;H3BR95;H3BNY4;B7Z7V6	GATOR complex protein WDR59	WDR59			6	4	2	0	1	2	1	0	1	1	0	2	0	1	2	1	0	1	1	0	109.79	0	11.626	3.2	0	1.4	3.2	1.2	0	1.2	1.2	0	166710000	0	94833000	87181000	104080000	33297000	0	4.57923e+07	27010000	47064000	0	2.46913e+07	1.85459
Q9Y4P8	WD repeat domain phosphoinositide-interacting protein 2	WIPI2			1	4	1	1	1	0	0	0	0	0	1	1	1	1	0	0	0	0	0	1	49.408	0	15.259	7	1.8	2.2	0	0	0	0	0	2	275860000	550160000	91609000	3.05876e+08	0	0	0	0	0	0	91447000	3.04823e+07	0
A0A6Q8PFM0;F5GWT4;Q9H4A3;H0YH68	Serine/threonine-protein kinase WNK1	WNK1			4	2	1	2	0	0	0	0	0	0	0	1	2	0	0	0	0	0	0	0	159	0.00091075	3.4269	1	1.6	0	0	0	0	0	0	0	87986000	147120000	0	7.83687e+07	0	0	0	0	0	0	0	0	#DIV/0!
Q9HAV4;H0Y3Q8;H0Y9I3;H0Y3W3	Exportin-5	XPO5			4	6	0	4	1	0	1	2	0	2	0	0	4	1	0	1	2	0	2	0	136.31	0	27.595	0	5.9	1.2	0	1.7	2.4	0	3	0	0	573300000	64362000	212554000	0	69476000	135020000	6.81653e+07	0	313400000	0	1.04467e+08	0.652508
Q86Y38	Xylosyltransferase 1	XYLT1			1	2	2	0	0	0	0	0	0	0	0	2	0	0	0	0	0	0	0	0	107.57	0.0060406	2.2212	2.2	0	0	0	0	0	0	0	0	120980000	0	0	4.03267e+07	0	0	0	0	0	0	0	0	#DIV/0!
A0A087X0Q1;Q7Z739;A0A024R7W5;A0A087WY31;Q9BYJ9;A0A087X0C3;S4R373	YTH domain-containing family protein 3	YTHDF3			7	3	0	3	0	0	1	0	0	2	0	0	3	0	0	1	0	0	2	0	63.674	0	8.1264	0	7.9	0	0	4.8	0	0	6	0	0	418760000	0	1.39587e+08	0	38129000	0	1.27097e+07	0	199480000	0	6.64933e+07	0.191142
Q9C0B5;H0YEF4	Palmitoyltransferase ZDHHC5	ZDHHC5			2	6	0	1	5	1	2	2	0	1	1	0	1	5	1	2	2	0	1	1	77.544	0	29.784	0	2.2	10.5	2.2	5.2	3.5	0	2.2	2.2	0	113260000	638640000	2.50633e+08	0	191020000	328210000	1.73077e+08	0	113410000	118010000	77140000	2.24367
Q9P0L1;A6NHJ4;G3V1M0;J3KR62;A0A7P0TAN4;A0A087WVZ7;Q9H963;Q8N782;Q8NCK3;Q9Y5A6;Q9NV72;Q96NL3;Q96N58;Q0VGE8;Q9UJW7;Q8N4W9;Q96IR2;Q05481	Zinc finger protein with KRAB and SCAN domains 7	ZKSCAN7			18	2	2	0	1	2	0	0	2	1	0	0	0	0	0	0	0	0	0	0	85.032	0	32.875	7.6	1.2	4	7.6	1.2	1.2	7.6	5.2	1.2	665250000	0	50496000	238582000	1060400000	0	0	3.53467e+08	168100000	16289000	0	61463000	5.75089
P17028	Zinc finger protein 24	ZNF24			1	5	3	1	0	2	2	0	1	0	0	3	1	0	2	2	0	1	0	0	42.155	0	9.8506	8.7	4.1	0	6.2	6.8	0	3.5	0	0	301090000	100720000	0	1.33937e+08	135800000	66668000	0	6.74893e+07	74678000	0	0	2.48927e+07	2.71121
A6NFI3	Zinc finger protein 316	ZNF316			1	5	1	1	0	2	1	0	2	0	0	1	1	0	2	1	0	2	0	0	108.44	0	15.366	2.3	0.9	0	5.5	2.1	0	3.3	0	0	297410000	292980000	0	1.96797e+08	294910000	0	0	9.83033e+07	180030000	0	0	60010000	1.63812
Q96PM9;H0YIX3;F8VWV6;F8VSJ1;F8VQ24;F8VRY0;H0YI55	Zinc finger protein 385A	ZNF385A			7	6	6	2	0	3	1	0	0	2	1	6	2	0	3	1	0	0	2	1	40.453	0	14.616	18.4	7.5	0	7	2.8	0	0	5.4	2.1	312820000	137630000	0	150150000	172200000	69721000	0	8.06403e+07	0	62194000	25739000	29311000	2.7512
Q9C0F3	Zinc finger protein 436	ZNF436			1	2	1	0	0	1	0	0	0	0	0	1	0	0	1	0	0	0	0	0	54.276	0.00063674	4.1532	3.2	0	0	3.2	0	0	0	0	0	26805000	0	0	8935000	48591000	0	0	16197000	0	0	0	0	#DIV/0!
H3BPG6;Q86UK7;H3BQQ2	E3 ubiquitin-protein ligase ZNF598	ZNF598			3	3	3	2	1	2	0	0	1	1	0	3	2	1	2	0	0	1	1	0	98.786	0	22.955	5.1	3	1.3	3.4	0	0	1.3	1.3	0	233380000	131680000	0	1.21687e+08	96567000	0	0	32189000	29418000	48716000	0	2.60447e+07	1.23592
	Note: T = A431D cells expressing TurboID alone+Biotin; E = A431D cells expressing E-cadherin-TurboID+Biotin; P = A431D cells expressing P-cadherin-TurboID+Biotin
[truncated: 6 more columns]
